# Supplementary material
Source: publisher site journal article supplement (http://static.cambridge.org/content/id/urn:cambridge.org:id:article:S0022143016000083/resource/name/S0022143016000083supp001.xls)
Supplement: Supplementary file 1 [file S0022143016000083supp001.xls]

## Sheet: Element ratio
Series	Sample	AR	Circlarity	3-D diameter	Mineral Type	Na	Mg	Al	Si	K	Ca	Ti	Fe	O	Cl	S	C	Mn	P	Zn	Pt	F	La	Ce	Nd	Pd	Y	Ba	Zr
1	DD-001	1.41853	1.71756	4.13794	Muscovite	0.37	0.35	18.93	24.15	8.88			0.55	46.77
2	DD-002	1.59091	1.77259	3.72076	Chlorite		8.47	12.42	15.7	0.44			19.84	43.13
3	DD-003	1.277	2.36892	2.95486	Illite	0.67	3.2	14.1	24.4	5.74			5.62	46.27
4	DD-004	1.15592	1.97113	8.24496	Feldspar	6.05	0.1	9.6	34.38					49.87
5	DD-005	1.4783	1.58466	3.97906	Smectite	0.17	2.6	12.83	31.61		1.26		1.26	50.24						0.03
6	DD-006	1.42605	2.48759	2.46738	I/M Mix	0.51	1.65	10.21	28.59	7.5			4.97	46.58
7	DD-007	2.36385	2.20442	3.83338	Quartz	0.2	0.64	2.01	43.29	0.8			0.9	52.15
8	DD-008	2.86305	1.95254	3.7126	Illite	0.13	2.57	13.82	25.07	7.85		0.35	4.04	46.17
9	DD-009	1.62236	2.2093	4.74171	Quartz	0.31	0.1	0.51	46.02					53.06
10	DD-010	1.12619	1.31357	4.17272	I/M Mix	0.59	1.61	15.9	25.31	6.43		0.48	2.66	47.02
11	DD-011	1.59617	1.4644	5.45008	Quartz	0.36	0.93	7.29	36.13	3.16			2.16	49.96
12	DD-012	2.73051	1.77015	2.05974	Chlorite	0.36	8.54	3.12	25.89	0.5	6.47		10.09	45.03
13	DD-013	2.06833	1.5281	2.84262	Quartz	0.06	0.41	0.5	45.95					53.08
14	DD-014	1.79066	1.38265	4.35531	Illite		2.18	12.47	25.67	6.8		0.49	6.25	46.16
15	DD-015	1.77947	1.34311	2.23421	I/S Mix	0.52	2.21	9.05	33.65	2.83			2.2	49.54
16	DD-016	1.61416	1.48783	2.25421	Quartz	0.14	0.29	1.44	44.95	0.39				52.8
17	DD-017	1.68362	1.458	1.91997	Chlorite	0.94	1.55	5.46	21.36	1.13	0.42		26.72	42.42
18	DD-018	1.26506	1.54382	1.96619	Chlorite	0.7	3.54	8.13	28.96	2.01	1.73	1.94	5.45	47.54
19	DD-019	2.27913	2.03318	1.6084	I/M Mix	3.05	2.64	9.41	29.74	5.96	0.44		1.62	47.14
20	DD-020	1.458	1.50557	1.3985	I/S Mix	0.09	2.97	11.65	27.14	4.28			6.81	47.07
21	DD-021	1.66214	1.45076	1.92608	Chlorite	1.83	5.31	7.91	25.49	1.15	2.36	0.85	9.19	45.91
22	DD-022	1.18397	1.99881	1.54315	I/S Mix	2.81	1.92	9.69	24.09	1.91	0.77		13.84	44.96
23	DD-023	1.3637	1.18707	1.90696	I/S Mix	0.39	2.34	13.26	27.82	4.87			3.61	47.71
24	DD-024	1.3297	1.36118	2.35941	Illite	0.43	1.87	13	28.09	6.08			3.04	47.49
25	DD-025	1.51953	1.46447	1.6363	Chlorite		4.24	8.47	19.36	1.91	0.77		22.5	42.74
26	DD-026	1.09606	1.39936	1.43826	Quartz	0.49	0.64	2.13	43.02	0.51			1.12	52.09
27	DD-027	1.66198	1.56493	4.88727	Feldspar	7.3	0.15	9.27	31.91					48.31															3.05
28	DD-028	2.33705	2.17655	2.13478	Smectite	5.67	1.21	9.69	32.08	0.63			1.85	48.87
29	DD-029	1.86416	1.69713	1.82519	Feldspar			7.21	23.35	25.17			4.27	40
30	DD-030	1.38364	1.3957	6.06825	Quartz	0.1	0.41	1.8	42.05	0.64			0.74	51.3															2.95
31	DD-031	1.23825	2.04349	1.17024	Feldspar	6.23	0.4	7.32	35.25	0.58			0.7	49.52
32	DD-032	1.78299	2.15822	4.53939	Chlorite	0.84	4.54	10.64	24.79	2.96	2.43		7.87	45.94
33	DD-033	1.35089	2.3795	2.79417	Quartz	0.5	0.47	1.97	43.75	0.36			0.56	52.39
34	DD-034	1.55528	2.57575	3.10378	I/S Mix	0.36	2.62	12.8	28.19	2.45	0.58		4.84	48.16
35	DD-035	1.58544	1.99373	3.05028	Quartz			0.91	45.94					53.15
36	DD-036	1.75791	1.53412	2.09534	I/M Mix	0.48	2.59	15.11	24.87	5.42			4.74	46.79
37	DD-037	1.60741	1.82988	2.55257	Feldspar	0.26	0.41	9.4	30.51	12.07			0.98	46.37
38	DD-038	1.85157	2.35829	2.66128	Quartz	0.35	0.79	2.74	42.04	0.8			1.49	51.78
39	DD-039	1.11913	1.35588	3.73595	I/M Mix	0.89	1.05	16.76	25.94	6.21			1.69	47.46
40	DD-040	1.68953	1.75257	2.21182	Quartz	0.08	0.46	1.2	44.46	0.55			0.77	52.49
41	DD-041	2.08843	1.86338	4.55733	Feldspar		0.3	11.46	20.98		13.86		9.5	43.9
42	DD-042	1.52827	1.66571	7.43415	Muscovite		1.21	15.78	25.02	8.01		0.67	2.73	46.59
43	DD-043	1.73278	1.89635	6.41985	Quartz		0.45	1.44	44.22	0.81			0.68	52.41
44	DD-044	1.36786	1.80257	3.62939	I/M Mix		1.76	12.95	27.65	7.79			2.85	47
45	DD-045	1.2051	1.35433	2.4273	Carbonate	0.53	21.63	1.68	4.84		35.65			35.66
46	DD-046	2.19764	2.24355	2.48155	Quartz		0.48	1.75	44.4	0.76				52.61
47	DD-047	1.46286	2.207	1.94973	Illite		1.74	14.29	26.84	6.88			3.07	47.17
48	DD-048	1.79137	1.60428	2.52432	Feldspar	8.08	0.5	10.1	31.22	0.7	0.29		0.8	48.3
49	DD-049	2.50298	2.06728	2.74593	Illite		2.55	14.41	26.61	6.4			2.72	47.3
50	DD-050	6.72167	3.62418	6.83024	Quartz		1.44	3.23	40.65	1.17			2.19	51.32
51	DD-051	1.852	1.76913	3.94688	Quartz		0.81	1.23	44.12	0.36	0.32		0.75	52.41
52	DD-052	1.75838	1.2606	3.22643	Biotite		5.75	10.77	20.38	4.95		0.87	13.36	43.92
53	DD-053	1.3624	1.33965	3.73961	I/M Mix		1.58	10.68	29.39	7.45			3.75	47.16
54	DD-054	1.59715	1.15355	2.57407	Feldspar	9.01	0.34	9.68	32.05				0.3	48.61
55	DD-056	3.51316	3.25457	13.9755	I/M Mix		3.12	9.13	19.17	5.79		2.05	18.31	42.44
56	DD-057	1.81928	1.49647	5.80008	Quartz	0.16	0.57	1.14	44.55	0.44			0.59	52.55
57	DD-058	1.40057	1.00501	11.3547	Chlorite	0.14	4.1	9.66	18.55	0.62			24.02	42.92
58	DD-059	1.81387	1.70795	13.008	Feldspar	6.5	0.12	10.07	32.58	0.18	0.94		0.56	49.06
59	DD-060	1.03916	1.41127	15.756	Feldspar	8.33	0.06	9.97	32.38	0.04	0.37			48.85
60	DD-061	1.71153	2.72584	23.6214	C/B Mix		10.78	10.63	15.95	1.7		0.38	17.64	42.91
61	DD-062	1.51832	1.49315	9.85857	Biotite	0.37	5.29	9.21	22.72	3.28	0.21	0.88	13.31	44.74
62	DD-063	1.37727	1.54807	5.07774	Illite	0.34	2.26	14.06	26.07	7.71	0.07	0.59	2.16	46.74
63	DD-064	1.97196	1.21757	4.23965	Quartz	0.06	0.35	1.81	43.73	0.49	0.02	0.07	1.15	52.33
64	DD-065	1.82337	2.60462	6.82057	Illite	0.52	2.52	11.94	24.59	5.52	1.03	0.56	7.63	45.68
65	DD-066	1.33865	1.86852	6.12376	Feldspar	7.67	0.55	9.71	32.2	0.08			0.99	48.8
66	DD-067	1.2259	1.00108	4.66228	I/S Mix	0.95	2.06	15.21	26.26	5.77			2.42	47.34
67	DD-068	2.73053	1.82276	6.03119	Feldspar	3.24	0.59	14.23	27.12	4.08	2.45		0.98	47.31
68	DD-069	1.59129	1.26336	5.96971	Illite		2.12	13.49	26.08	7.38			4.42	46.51
69	DD-070	1.32094	1.32123	6.43699	Feldspar	5.85		10.08	33.46	0.88			0.3	49.43
70	DD-071	1.49941	1.91011	6.43433	Quartz		0.5	0.91	45.11	0.28			0.42	52.78
71	DD-072	1.86971	1.17177	9.43737	Muscovite	0.43	1.05	16.4	24.89	8.21		0.43	1.99	46.6
72	DD-073	1.39205	1.28156	8.31564	Hi-Fe group	0.77	0.8	5.67	12.75	0.48	2.21		33.63	40.01	0.58	1.12			1.97
73	DD-074	1.59878	2.30344	3.27701	Quartz	0.35	1.37	1.91	40.64	0.28	0.43		4.04	50.99
74	DD-075	1.45217	1.3555	16.0922	Muscovite	0.19	1.43	15.96	24.01	9.32		0.46	2.72	45.93
75	DD-076	1.32066	1.88938	6.03778	Illite	0.44	1.96	8.49	26.52	3.96		0.99	11.87	45.78
76	DD-077	3.54244	2.20516	8.36052	Quartz	0.15	0.21	0.36	46.17					53.11
77	DD-078	1.44889	1.33144	5.02117	Quartz	0.06	0.37	0.59	45.9					53.08
78	DD-079	1.50805	1.75075	3.7385	Quartz	0.1	1.64	3.1	41.43	1.2			0.85	51.68
79	DD-080	1.3217	1.33176	3.29362	Feldspar	8.17	0.14	9.57	32.87	0.31				48.95
80	DD-081	2.04136	1.39624	4.27535	Chlorite		7.13	10.87	17.1	0.57			21.25	43.08
81	DD-082	1.23077	1.05389	4.06352	I/S Mix	0.86	0.89	7.13	14.12	2.46			1.66	59.68			13.2
82	DD-083	1.19908	2.96241	5.3411	C/B Mix	0.99	6.34	11.1	25.4	4.35			5.31	46.51
83	DD-084	1.52736	1.86762	4.00702	Chlorite	0.28	5.41	11.07	24.26	2.01			10.78	46.19
84	DD-085	1.45993	1.92083	4.82799	Illite	0.05	1.79	11.66	28.92	5.47		0.59	3.85	47.68
85	DD-087	1.87221	1.63666	3.6891	Quartz	0.05	0.2	0.77	45.3	0.29			0.62	52.77
86	DD-088	1.56674	1.30093	5.48837	Chlorite	0.93	7.78	3.02	23.74	0.67	6.93	0.68	12.38	43.86
87	DD-089	1.44043	1.23782	5.32364	Biotite	1.05	7.27	9.98	24.54	4.06		1.01	6.02	46.08
88	DD-090	1.12165	1.06205	5.39894	I/S Mix	0.38	3.42	12.17	26.3	3.91		0.49	6.31	47.02
89	DD-091	2.95719	1.79742	3.12287	I/M Mix	0.5	1.61	16.72	25.7	5.58			2.36	47.53
90	DD-092	1.1144	1.74667	3.61871	Illite	0.57	2.64	10.55	28.44	5.01	0.38		5.25	47.16
91	DD-093	1.63834	1.32286	1.44878	Chlorite		8.77	11.8	18.41	0.55			16.18	44.3
92	DD-094	1.16618	1.08413	1.32274	Quartz	0.15	1.61	2.23	42.25	0.63			1.25	51.89
93	DD-095	1.20535	1.2137	1.48782	I/S Mix	0.53	2.22	13.9	26.4	5.1		0.28	4.38	47.19
94	DD-096	1.44495	1.00909	1.14187	I/S Mix	4.76	1.99	10.31	30.29	2.57			2.02	48.05
95	DD-097	1.17092	1.51756	2.18293	Quartz		0.52	1.1	44.8	0.3			0.61	52.68
96	DD-098	1.03907	1.38913	1.04064	Quartz	0.38	1.32	2.05	42.76	0.72			0.76	52.01
97	DD-099	1.52912	1.66234	1.42434	Feldspar	8.07	0.63	9.39	31.93	0.55		0.25	0.65	48.52
98	DD-100	1.7093	1.32263	1.14959	Smectite	7.72	1.09	10.28	30.34	0.7	0.74		1.09	48.03
99	DD-101	1.38316	1.34723	1.4944	I/S Mix	0.76	2.58	13.98	25.48	4.42			5.91	46.87
100	DD-102	1.83792	1.25078	1.05466	Smectite	3.85	1.41	8.61	31.96	1.01	0.99		3.67	48.51
101	DD-103	1.6544	1.58933	1.48977	I/S Mix	1.94	3.55	11.25	27.2	3	0.73	0.28	4.16	47.49		0.41
102	DD-104	1.45954	1.43486	2.33437	Feldspar	7.94	0.38	9.95	32.21	0.27			0.44	48.81
103	DD-105	1.73763	1.53225	1.55612	I/M Mix	0.67	1.7	16.59	25.42	6.11			2.22	47.28
104	DD-106	1.41049	1.22877	1.12157	I/S Mix	0.3	2.3	7.5	34.32	2.95		0.72	2.41	49.5
105	DD-107	1.8703	1.90425	1.5293	Kaolinite	0.43	1.02	18.8	27.34	1.2	0.26		1.35	49.61
106	DD-108	1.21789	1.39199	5.15308	I/M Mix	0.33	6.07	10.53	17.21	2.87			20.52	42.48
107	DD-109	1.26749	1.27351	4.31995	Illite	0.38	3.18	11.75	26.63	5.09			6.25	46.73
108	DD-110	1.07114	1.18758	2.49255	I/S Mix	0.16	3.23	12.45	26.9	4.74			5.35	47.17
109	DD-111	1.56422	1.02346	2.53828	Quartz	0.05	0.52	0.89	45.53					53.02
110	DD-112	2.20083	1.43018	6.235	I/M Mix	0.23	1.21	16.72	25.36	7.08			2.32	47.08
111	DD-114	2.33603	1.69094	5.86003	Quartz		0.2	0.4	46.23					53.16
112	DD-115	1.35874	1.25058	5.88293	Illite	0.24	3.53	11.47	27.06	4.89		0.55	5.21	47.05
113	DD-116	2.21159	1.56523	7.14144	I/M Mix	1.07	0.52	17.43	25.32	6.96			1.54	47.15
114	DD-117	1.1527	1.17432	5.04799	Chlorite		6.36	10.34	21.32	2.23			15.12	44.63
115	DD-118	1.17814	1.46078	6.51246	Feldspar			9.23	32.04	11.64				47.09
116	DD-119	1.272	1.61249	3.45789	Feldspar	3.38	0.26	14.2	26.58	0.34	7.16		0.62	47.46
117	DD-120	4.19369	2.32664	3.88369	Illite		1.5	15.06	26.04	6.39			3.96	47.06
118	DD-121	1.29026	1.34242	7.5023	Biotite		6.74	9.44	21.44	4.93		0.84	12.45	44.17
119	DD-122	1.15104	1.06958	2.68536	Quartz		0.46	0.89	44.89	0.34			0.77	52.64
120	DD-123	2.77695	1.66117	5.0292	Muscovite		1.09	15.75	26.17	7.85			2.09	47.05
121	DD-124	1.40459	2.49429	3.36626	I/S Mix	0.59	4.13	10.72	25.62	3.28	1.04	0.43	7.44	46.22	0.53
122	DD-125	1.14317	1.99001	4.75043	Quartz			3.06	43.17	1.55				52.22
123	DD-126	1.1588	1.34389	3.55312	I/S Mix		2.77	14	26.53	5.44			3.96	47.31
124	DD-127	1.20722	1.15908	4.18727	Feldspar	8.17		10.17	32.31		0.47			48.88
125	DD-128	2.81241	2.42573	4.75457	Muscovite		1.06	15.7	23.89	7.67			1.5	44.95							5.23
126	DD-129	1.43277	1.27243	2.4527	Quartz		0.66	1.88	42.99	0.56			1.08	52.36		0.46
127	DD-130	1.14689	1.41935	3.61317	Chlorite		7.75	11.62	16.42	0.54			20	43.03				0.64
128	DD-131	1.12001	1.49421	3.17722	Smectite	6.97	1.18	9.24	32.43	0.41			0.92	48.85
129	DD-132	1.60933	1.18921	3.77968	I/M Mix			18.72	25.65	8.1				47.53
130	DD-133	1.2493	1.59262	3.11958	Illite		2.37	14.24	26.28	5.76			4.21	47.15
131	DD-134	1.40031	1.93844	3.01356	Chlorite		9.92	11.52	16.95				17.87	43.75
132	DD-135	1.8143	2.12411	5.46633	I/S Mix		3.54	13.3	26.85	5.27			3.64	47.39
133	DD-136	2.77596	2.59967	3.50931	I/M Mix		1.82	15.79	25.49	6.65			3.22	47.03
134	DD-137	1.76812	1.19197	3.04036	Smectite	7.56	1.12	10.39	30.71	0.83	0.5		0.65	48.24
135	DD-139	1.4156	1.37793	8.17785	Muscovite		0.84	16.28	25.45	7.97			2.66	46.8
136	DD-140	1.23608	2.705	3.60443	Illite	2.11	1.42	10.81	29.5	5.09			3.58	47.48
137	DD-141	1.73178	1.92736	4.70696	I/M Mix	2.67	0.99	9.89	30.66	6.66	0.75		0.99	47.4
138	DD-142	3.56744	1.75331	3.94966	Illite	0.96	2.03	14.57	26.4	6.32			2.61	47.12
139	DD-143	1.38563	1.75618	4.12689	Quartz		0.32	0.74	45.53				0.47	52.94
140	DD-144	1.46374	1.85336	7.24142	Feldspar	6.51	0.47	10.01	32.09	0.53	0.31		1.26	48.81
141	DD-145	1.60147	1.48627	2.44552	Feldspar	7.39	0.49	11.12	30.69	1.58			0.46	48.27
142	DD-146	1.50653	1.57364	2.73081	I/S Mix	0.39	2.77	12.43	28.38	4.59			3.62	47.83
143	DD-147	1.56638	1.48061	3.09038	I/S Mix	1.33	1.24	14.08	27.85	5.26			2.54	47.7
144	DD-148	1.29429	1.4712	4.95917	Illite	0.4	1.69	12.74	27.75	5.85			4.32	47.25
145	DD-149	2.05726	1.27577	6.76516	Biotite	0.13	9.86	8.99	20.28	3.94		0.55	12.21	44.05
146	DD-150	1.56594	1.32813	3.00325	Quartz	0.27	3.03	3.76	38.38	1.24			2.74	50.59
147	DD-151	1.21789	1.32898	3.55669	Biotite	0.14	7.45	10	24.74	3.11	0.35		7.99	46.23
148	DD-152	1.21707	1.3591	6.07538	Biotite	0.43	7.93	9.29	19.6	5.03		0.91	13.42	43.38
149	DD-153	1.28802	1.08586	3.91719	Muscovite	0.5	1.86	15.16	24.85	7.15		0.34	3.69	46.46
150	DD-154	1.30223	1.27624	3.64774	Illite	0.52	2.81	13.09	26.34	5.78			4.63	46.85
151	DD-155	2.00738	1.8007	6.08804	Chlorite	0.08	7.71	9.39	17.1	0.53			22.48	42.71
152	DD-156	1.67525	1.276	3.19943	Chlorite	0.48	6.88	11.75	17.91	0.98			18.36	43.64
153	DD-157	2.00811	1.48633	1.93548	Quartz		0.48	0.92	45.56					53.04
154	DD-158	1.28686	1.19112	2.62726	Illite	0.43	1.86	14.95	25.8	8.26			2.06	46.64
155	DD-159	1.31919	1.45639	1.25793	I/M Mix	0.43	1.15	16.9	25.94	7.07			1.09	47.41
156	DD-160	1.47194	1.84315	0.979006	C/B Mix	0.27	5.65	9.76	27.97	3.26			5.65	47.45
157	DD-161	1.16236	1.03772	1.18778	Chlorite	0.41	6.84	12.47	17.75	0.6			18.09	43.85
158	DD-162	1.26395	1.278	3.92729	Chlorite		7.96	12.69	14.52				22.22	42.61
159	DD-163	3.60985	2.57081	3.51827	Carbonate			0.28	0.54		24.82			48.46			7.41		13.9			4.59
160	DD-164	1.43863	1.70294	2.60438	Illite	0.24	1.57	12.66	26.55	6.27	0.73		5.45	46.54
161	DD-165	1.38163	1.58857	2.5179	Chlorite		9.66	11.14	18.66	0.69			15.52	44.33
162	DD-166	1.61696	1.80757	4.08186	Feldspar	0.6	1.18	15.49	25.93	8.07			1.94	46.79
163	DD-167	1.49347	1.63655	3.25043	I/S Mix	1.62	1.73	13.37	25.21	3.78	1.33	1.44	4.84	46.67
164	DD-169	1.61028	1.44538	2.35653	I/S Mix	1.18	2.53	13.74	27.22	4.81			2.97	47.56
165	DD-170	1.29822	2.18418	2.02611	C/B Mix	0.4	2.36	4.44	37.1	1.35		1.49	2.58	50.29
166	DD-171	2.1252	1.38549	2.44677	Carbonate		0.12	0.23	9.24	0.06			0.11	67.79			21.3				1.16
167	DD-172	1.79304	1.82348	3.67446	Illite		2.6	13.66	27.28	6.56			2.53	47.37
168	DD-173	1.48622	1.50537	1.64715	Smectite	1.15	2.76	10.92	30.1	0.84	0.94		4.57	48.73
169	DD-174	1.13856	1.17378	11.1888	Quartz		0.51	1.56	43.18	0.44		1.29	0.81	52.21
170	DD-175	1.32632	1.73794	2.10173	Illite	0.54	2.58	12.03	28	5.35		0.7	3.33	47.48
171	DD-176	3.16366	1.43713	1.398	I/S Mix	0.94	2.14	11.4	29.94	3.22			4	48.36
172	DD-177	1.26055	1.44084	5.42159	Chlorite	0.22	6.21	11.86	17.83	0.46			19.8	43.62
173	DD-178	1.64981	2.60711	3.14656	Biotite		7.49	8.13	25.66	3.02	1.28		8.33	46.1
174	DD-179	1.51173	2.8425	1.4412	C/B Mix		7.65	9.57	26.4	2.34	1.73		5.26	47.05
175	DD-180	2.23642	1.40686	1.37856	Quartz	0.15	1.58	1.04	42.05	0.37			3.35	51.45
176	DD-181	1.44612	1.22004	2.20888	Hi-Fe group		1.81	4.67	17.53				35.44	40.55
177	DD-182	2.16713	1.66901	3.18889	Chlorite		7.16	10.86	17.22	0.72			20.91	43.13
178	DD-183	2.03636	1.36435	1.75844	Biotite	0.3	4.29	8.43	28.53	3.95	0.66		6.87	46.96
179	DD-184	2.20202	1.17464	2.15238	I/M Mix	0.29	1.14	3.46	34.05	2.53			10.7	47.84
180	DD-185	1.64785	1.44543	2.64848	Feldspar	2.55		14.75	25.69	0.54	8.48		0.86	47.13
181	DD-186	1.4758	1.51302	1.53845	C/B Mix		2.68	6.03	36.8	1.78	0.5		1.82	50.39
182	DD-187	2.14447	1.26301	2.16616	I/S Mix	0.82	4.64	11.64	24.6	2.55	1.98		4.44	47.57		1.76
183	DD-188	1.13606	2.06632	3.01544	Muscovite	0.19	1.42	13.96	23.12	7.96		5.77	1.62	45.94
184	DD-189	1.24921	1.11458	7.7621	I/M Mix	0.44	1.2	15.65	25.74	6.66			3.34	46.98
185	DD-190	1.38443	1.47517	3.79378	Quartz		2.12	2.08	42.2	0.94			0.81	51.86
186	DD-191	1.14451	1.0953	3.70453	Chlorite	0.17	10.06	8.02	22.58	0.49	0.77		12.55	45.34
187	DD-192	1.36775	1.29181	3.25577	I/M Mix		0.62	3.73	29	3.99			17.55	45.12
188	DD-193	1.5829	1.24951	3.25054	Feldspar	0.38	1.07	15.23	25.94	7.63			2.99	46.77
189	DD-194	1.34575	1.2554	8.78795	Feldspar	7.87	0.23	9.8	32.95					49.15
190	DD-195	1.34819	1.19435	9.77739	Quartz	1.53	1.01	5.07	38.86	0.66			1.93	50.94
191	DD-196	1.58023	3.59511	3.37796	Quartz	0.21	0.79	2.08	43.17	0.47			1.1	52.19
192	DD-197	1.29874	1.71163	9.51437	Illite		1.98	13.21	27.23	6.97			3.58	47.04
193	DD-198	1.48878	1.14652	5.83872	Illite	1.22	2.02	13.86	25.42	6.17		0.44	4.4	46.48
194	DD-199	1.72668	1.28049	3.60954	Biotite	0.42	15.74	2.78	27.08	1.4			5.92	46.66
195	DD-200	1.46674	1.43987	3.21917	Quartz	0.34	0.75	1.86	43.49	0.47			0.83	52.26
196	DD-201	1.85815	1.56452	14.0162	Muscovite	0.11	0.88	12.66	20.87	7.55			4.53	49.51			3.89
197	DD-202	1.33364	1.19705	18.4844	I/M Mix	0.17	2.84	8	24.35	13.99			7.7	42.95
198	DD-203	2.20595	1.06995	9.24466	C/B Mix	0.5	12.17	9.85	24.18	0.97			5.35	46.99
199	DD-204	1.54219	2.81653	15.1523	I/S Mix	0.56	3.12	10.58	28.61	3.89	0.57		5.16	47.5
200	DD-205	2.0056	1.14924	4.65956	Chlorite		3.59	6.34	27.31	1.58	5.8	0.97	8.4	46.01
201	DD-206	1.26544	1.45994	19.7309	Chlorite	0.08	12	12.11	17.79				13.33	44.69
202	DD-207	1.6706	2.36203	6.9169	Muscovite	0.16	0.64	17.65	24.27	9.19		0.75	0.81	46.54
203	DD-208	2.00493	1.49703	4.34506	Illite		3.84	13.59	23.2	7.61		3.26	2.6	45.9
204	DD-209	1.02565	2.0226	1.4091	I/M Mix	0.26	5.42	15.35	21.96	5.45		0.39	5.24	45.94
205	DD-210	1.08468	1.58918	3.66883	Feldspar	8.23		11.54	30.26		1.69			48.28
206	DD-211	1.21666	1.75727	2.17787	Biotite	0.81	6.23	10.95	21.16	4.85			11.74	44.26
207	DD-212	1.38987	1.70766	1.23043	Chlorite	0.67	6.81	9.22	20.2	1.5	1.32	0.63	15.71	43.94
208	DD-213	1.57735	1.52591	0.995064	I/S Mix	3.19	2.86	10.17	28.64	2.1			5.56	47.49
209	DD-214	1.69379	1.63547	2.53434	Carbonate	0.06	7.26	1.38	2.77	0.31	22.62		0.56	52.35			12.7
210	DD-215	1.48789	1.34976	1.35961	I/S Mix	4.96	2.88	9.69	28.52	2	2.96		1.86	47.13
211	DD-217	1.90458	1.36673	2.01972	Smectite	6.22	0.97	10.41	31.05	0.67	1.15		1.05	48.48
212	DD-218	1.87585	1.15276	1.39798	Chlorite	1.1	8.66	9.01	21.33		2.91		12.19	44.8
213	DD-219	1.85455	2.83316	1.27645	I/M Mix		2.91	9.89	24.82	8.05			9.57	44.75
214	DD-220	1.42553	1.49781	2.30495	Quartz		0.53	0.89	45.02	0.3			0.54	52.72
215	DD-221	1.58403	1.43466	1.85437	I/S Mix	0.22	1.19	3.05	37.16	0.98		2.16	5.37	49.86
216	DD-222	2.09064	1.76664	0.83366	I/S Mix	1.06	4.4	13.28	25.18	3.79			5.42	46.87
217	DD-223	5.53167	2.91007	2.50821	Chlorite	0.82	10.58	4.09	25.76		6.21		6.87	45.67
218	DD-224	1.88365	1.70374	1.16792	Illite		2.47	12.8	27.6	5.23			4.48	47.44
219	DD-225	2.09666	1.46957	1.32415	Biotite		7	11.29	22.47	4.31			9.65	45.28
220	DD-226	1.19571	1.22148	3.52406	Illite	0.14	2.02	15.17	25.59	6.84			3.36	46.87
221	DD-227	1.47043	2.03442	1.79351	Illite		2.19	14.67	26.53	6.26			3.03	47.31
222	DD-229	1.77879	1.70298	2.87828	Feldspar	6.23		11.79	30.08		3.55			48.34
223	DD-230	1.75771	2.20498	1.26562	I/S Mix	0.72	4.28	12.94	23.26	4.72			8.41	45.66
224	DD-231	1.44527	1.33107	1.35014	Illite		1.87	13.77	26.5	7.2			3.87	46.8
225	DD-232	1.49773	1.02192	0.909846	Smectite	5.18	3.45	10.4	26.35	0.7	1.02		6.31	46.6
226	DD-233	1.47593	2.61621	1.75658	C/B Mix	0.31	12.03	10.96	24.54	1.76			3.01	47.39
227	DD-234	2.35521	1.74115	1.40567	I/S Mix	1.09	4.32	12.37	26	3.54			5.67	47.01
228	DD-235	1.29161	1.18062	0.973695	Feldspar	6.36		12.15	29.37	0.42	2.95		0.7	48.05
229	DD-236	1.72836	1.56155	1.5593	I/S Mix	1.2	1.63	15.34	26.57	5.18			2.52	47.55
230	DD-237	2.08471	1.60391	1.1213	I/S Mix	0.9	2.45	14.59	26.3	5.12			3.3	47.33
231	DD-238	1.45862	1.4222	0.898917	Smectite	8.22	0.95	9.83	30.49	0.91	0.54		1.17	47.88
232	DD-239	1.38227	1.50232	1.54299	Feldspar	9.49	0.26	9.55	31.7	0.27			0.41	48.31
233	DD-240	2.31318	1.60645	2.54382	Illite		1.98	13.9	27.07	6.04			3.68	47.33
234	DD-241	1.7133	1.61641	1.22504	Illite	0.26	3.54	11.9	26.8	5.34			5.27	46.89
235	DD-242	1.44604	1.15313	1.05586	Kaolinite		0.22	21.1	27.61	0.6				50.48
236	DD-243	1.18612	1.53884	3.21778	Kaolinite		0.16	20.93	27.3	0.78			0.6	50.23
237	DD-244	1.81639	1.64844	2.51862	Illite		3.25	13.59	26.05	6.4	1.33		2.55	46.84
238	DD-245	2.07142	1.7861	1.5225	Illite		1.99	14.54	26.14	7.51			2.98	46.84
239	DD-246	1.79254	1.30798	2.25017	Illite		1.67	15.4	26.09	7.26			2.5	47.08
240	DD-247	1.90835	1.59899	1.43946	I/M Mix		1.39	15.96	25.52	7.11			3.06	46.96
241	DD-248	1.14965	1.3872	3.35536	Feldspar	4.2	0.27	12.99	28.58	0.38	5.54			48.04
242	DD-249	1.87601	1.63851	2.47396	Quartz	0.26	1.1	4.5	39.35	1.66			2.2	50.93
243	DD-250	1.60204	1.60452	10.4194	I/M Mix	1.03	1.49	16.34	25.46	7.11			1.56	47
244	DD-252	1.2211	1.28898	1.59453	Quartz		2.36	3.43	40.01	0.87			2.08	51.26
245	DD-254	1.73193	1.41057	3.83104	Quartz		0.26	0.44	46.16					53.15
246	DD-255	1.60569	1.19663	1.6977	Quartz		0.45	1.87	44.02	0.54			0.63	52.49
247	DD-256	1.20659	2.57057	3.32788	Illite	0.45	1.31	14.35	25.25	7.51		0.61	4.21	46.31
248	DD-258	1.89724	1.52358	3.41808	C/B Mix	0.41	4.57	14.12	18	2.22			16.8	43.89
249	DD-259	1.56504	2.50233	1.75909	Feldspar	0.33	0.43	9.07	31.61	10.96			0.61	46.99
250	DD-260	1.94799	1.48788	2.90333	Chlorite	1.05	5.74	7.69	27.14	0.36			10.67	46.74				0.61
251	DD-261	1.86435	1.88707	1.2405	Chlorite	1.11	5.59	10.3	23.1	1.68	1.26		11.6	45.37
252	DD-262	1.01415	1.1049	1.37657	Quartz	0.28	1.37	2.07	42	0.43			2.16	51.7
253	DD-263	2.5665	1.63421	3.69538	Chlorite		4.89	10.19	23.37	1.91			14.23	45.41
254	DD-264	1.98908	1.9834	3.36486	I/S Mix	0.5	3.28	10.38	26.11	3.13	0.82		9.44	46.34
255	DD-265	2.12398	1.37277	2.32213	Biotite	0.99	7.29	8.54	23.5	2.78			11.75	45.14
256	DD-266	1.29394	1.1753	1.27704	Biotite		14.34	5.73	15.79	1.75	15.38		5.59	41.42
257	DD-267	2.08235	1.61529	2.58063	Quartz	0.23	0.69	2.34	42.75	0.94			1.07	51.98
258	DD-268	2.85216	1.90034	2.71093	C/B Mix	0.37	5.46	12.51	19.3	1.62			16.48	44.25
259	DD-269	1.84522	1.73776	2.40217	C/B Mix	0.38	4.62	9.56	30.4	0.5	0.59		5.11	48.84
260	DD-270	1.40738	1.364	1.72026	I/S Mix	1.88	2.82	12.08	20.64	1.54	1.13		5.51	43.78	1.4	0.56													8.65
261	DD-271	1.42024	1.441	1.51159	I/S Mix	0.42	2.65	13.95	25.73	4.96			5.37	46.93
262	DD-272	1.61894	1.97251	4.82393	C/B Mix	1.17	6.49	9.77	27.48	2.49	0.69	0.36	4.07	47.46
263	DD-273	1.52916	1.32554	6.78151	Feldspar	5.56	0.62	11.4	29.81	0.68	2.46		1.33	48.14
264	DD-274	1.19428	1.24973	4.31186	Quartz		0.53	0.56	45.48				0.54	52.89
265	DD-275	1.14562	1.52878	3.3976	Quartz	2.21	0.31	2.78	42.66					52.04
266	DD-276	1.41409	1.28416	3.75268	Hi-Ti group		1.67	3.41	7.74	0.23		26.13	20.42	39.49				0.9
267	DD-277	1.60759	1.20867	5.25409	I/S Mix	1.62	2.8	9.03	29.65	2.4	2.26	0.57	3.97	47.7
268	DD-279	1.81436	1.97189	2.33272	Quartz		0.34	1.03	44.98	0.45			0.5	52.7
269	DD-280	5.55923	2.38618	3.02891	Chlorite		9.48	2.17	26.34	0.51	7.06		8.76	45.05				0.63
270	DD-281	1.36343	1.16331	2.69498	I/S Mix		4.99	13.46	25.11	4.07			5.37	47
271	DD-283	1.70817	1.1872	4.80784	Hi-Fe group		1.49	2.46	6.48		0.53	0.91	52.06	34.73	0.68	0.65
272	DD-284	1.34577	1.45278	1.78078	I/S Mix	4.26	1.21	8.7	32.18	1.27	0.34		3.49	48.56
273	DD-285	4.27209	1.84282	5.30576	Chlorite	0.68	10.05	1.55	27.68	0.25	7.52		6.61	45.66
274	DD-286	1.8796	1.52831	15.8096	Muscovite	0.37	0.82	17.12	24.56	8.76			1.9	46.48
275	DD-287	1.46809	1.77368	9.15018	Feldspar		0.41	14.15	21.01	0.29	13.92		5.45	44.76
276	DD-290	1.13674	1.34301	8.64932	Illite	0.41	1.55	11.56	25.53	5.75		1.11	7.28	46.31		0.49
277	DD-291	2.11059	1.39121	15.1262	I/M Mix		1.77	13.15	25.62	9.31			4.33	45.82
278	DD-292	1.16872	1.45653	18.0769	Biotite		5.55	7.89	18.29	3.14	3.67	0.62	18.75	42.09
279	DD-293	1.14151	1.04465	8.6843	Biotite		4.21	10.5	20.78	4.3	0.55		15.92	43.73
280	DD-294	1.44993	1.86907	8.11956	Feldspar	6.24	0.72	10.16	31.9	0.62	0.54		1.03	48.8
281	DD-295	2.78504	1.55537	5.14348	Chlorite	0.84	7.16	10.33	20.65	1.65	1.77		13.18	44.43
282	DD-296	1.70417	1.56124	6.56848	I/M Mix		4.55	14.79	19.74	5.31			11.1	44.5
283	DD-297	1.80922	1.53957	4.66789	Feldspar	2.5	0.24	14.76	25.82	0.3	9.11			47.27
284	DD-298	1.9087	1.23958	2.14743	Quartz	0.11	1.24	3.5	40.66	1.27			1.86	51.35
285	DD-299	2.17131	2.82196	2.31423	Feldspar	8.45	0.36	9.32	31.12	0.37	1.58		0.82	47.98
286	DD-300	1.58494	1.30458	2.71437	Illite	0.11	2.11	13.37	26.93	6.79			3.7	46.98
287	DD-301	1.41524	1.34694	8.53461	I/M Mix	0.72	1.31	17.32	24.86	6.49	0.67		1.53	47.1
288	DD-302	1.78306	1.4874	5.47172	Quartz		1.13	2.8	40.99	0.7	0.28		1.33	51.21				1.56
289	DD-303	1.40844	1.10007	4.23675	I/S Mix	0.52	2.41	10.91	28.9	4.3			4.48	47.49				0.99
290	DD-304	2.54595	1.33587	3.8161	I/S Mix	1.84	1.28	9.18	32.36	2.89			2.99	48.63				0.83
291	DD-305	1.05823	1.31558	15.7751	Unknown	0.4	1.51	5.14	35.9	2.5			5.2	49.35
292	DD-306	1.92392	1.20497	4.14712	Quartz	0.22	0.35	1.24	44.17				1.6	52.42
293	DD-307	2.57314	1.38311	8.23937	C/B Mix	0.26	8.54	12.12	23.2	4.41			5.35	46.12
294	DD-308	2.21505	1.28035	4.51754	Illite	0.35	1.76	15.29	25.81	6.75			3.06	46.98
295	DD-309	2.11642	1.34463	4.18597	Chlorite		8.24	9.25	23.55	2.76		0.53	9.98	45.69
296	DD-310	1.85156	1.3257	4.0518	Hi-Ti group	0.42	0.72	1.74	16.74	0.6		33.3	2.01	44.47
297	DD-311	1.20436	1.00087	1.89655	Illite	0.27	2.04	14.46	25.84	7.75		0.37	2.59	46.68
298	DD-312	1.15314	1.50547	3.5903	Quartz		0.71	1.76	43.37	0.72			1.3	52.15
299	DD-313	2.15977	1.47276	1.55866	Illite		1.57	15.12	26.16	6.78		0.78	2.36	47.22
300	DD-314	2.1215	1.33892	2.2995	Chlorite	0.1	5.87	11.33	19.3	1.16	0.4		17.83	44.02
301	DD-315	1.15384	1.19137	4.86282	Chlorite	0.27	4.71	7.06	11.33	0.64	0.13		10.29	55.04			10.53
302	DD-316	1.15381	1.32551	3.50612	Hi-Fe group	0.46	0.96	4.44	8.06	0.96	0.41	0.18	33.78	44.79			5.96
303	DD-317	1.55278	1.3573	3.94303	Quartz		0.57	1.37	43.89	0.65			1.25	52.27
304	DD-318	1.20923	1.02191	1.12781	Quartz		2.87	2.4	41	0.73			1.49	51.52
305	DD-319	1.29045	1.25012	8.62052	Muscovite		1.21	15.99	24.63	8.71			3.22	46.24
306	DD-320	2.05641	1.30221	1.5245	Illite		2.7	13.9	26.61	6.61			3.05	47.13
307	DD-321	1.15384	1.19137	4.86282	Chlorite	0.41	7.32	11.45	19.27	1.04	0.21		16.01	44.28
308	DD-322	1.00967	1.60297	6.74947	I/M Mix		1.55	14.42	25.37	8.94			3.6	46.12
309	DD-323	1.25013	1.69456	1.85449	Feldspar	2.51	0.18	9.45	31.36	7.91			1.29	47.3
310	DD-324	1.66431	1.4112	1.33428	Hi-Fe group		3.16	6.66	15.52	1.31		0.4	32.68	40.27
311	DD-325	1.58544	1.38396	1.55241	Chlorite		2.9	3.98	37.19	0.65			5.12	50.16
312	DD-326	1.46657	1.74953	2.55499	Biotite		3.91	8.77	19.47	5.7		1.69	17.91	42.55
313	MA-001	1.31348	1.27704	6.95988	Feldspar	3.56	0.64	13.16	27.77	0.48	5.81		0.8	47.77
314	MA-002	1.62681	1.57154	2.87973	Feldspar	7.54	0.28	10.7	30.96	0.24	1.27		0.6	48.41
315	MA-003	1.36839	1.96156	3.80938	Feldspar	6.99		9.76	33.33	0.69				49.23
316	MA-004	1.80599	1.8692	3.06747	I/S Mix	0.82	0.99	11.31	26.35	3.03			11.1	46.4
317	MA-005	1.6692	1.69298	2.01473	Muscovite		0.79	15.56	25.55	9.15			2.53	46.43
318	MA-006	1.30827	2.41712	2.78497	I/S Mix		4.77	12.77	28.74	1.43	1.39		1.95	48.94
319	MA-007	1.39402	1.92872	3.5025	Quartz			1.09	44.77	0.47			1.11	52.56
320	MA-008	1.06839	1.37267	6.22745	Chlorite		9.55	11.66	15.81	0.3			19.55	43.13
321	MA-009	1.34875	1.75885	5.00997	Quartz				46.74					53.26
322	MA-010	1.39269	1.64845	4.02928	Quartz		0.74	2.05	43.13	0.77	0.33		0.87	52.11
323	MA-011	1.06338	2.08039	4.19344	Feldspar	6.8	0.53	10.63	31.14	0.86	1.16		0.41	48.46
324	MA-012	1.06881	1.87662	4.59577	Quartz	2.28	0.27	3.43	41.56	0.41			0.42	51.63
325	MA-013	1.26679	1.74779	5.60428	Quartz	3.03	0.2	3.9	40.13	0.75		0.31	0.65	51.02
326	MA-014	1.29428	1.45057	3.21443	Carbonate		27.67		0.58		37.79			33.96
327	MA-015	1.63169	1.61971	2.9154	Chlorite		4.87	10.32	26.81	2.7	0.59	0.28	6.64	47.37		0.4
328	MA-016	1.96379	2.02509	1.51191	C/B Mix	0.83	7.02	12.65	19.32	1.52			14.11	44.55
329	MA-017	1.54456	2.30857	1.62772	C/B Mix		1.18	17.03	28.33	1.91	0.51		1.57	49.47
330	MA-018	1.64554	1.61112	1.4511	Quartz		0.82	1.34	44.1	0.34			0.94	52.45
331	MA-019	1.65307	1.37344	1.21191	I/S Mix		2.98	12.49	27.35	3.89			5.79	47.51
332	MA-020	1.83025	3.0526	0.822151	Illite		2.61	14.82	26.43	6.18			2.58	47.38
333	MA-021	1.58663	2.22928	0.917874	I/S Mix		3.68	11.3	22.6	3.84	1		7.37	43.65							6.56
334	MA-022	1.65401	1.68648	4.00116	I/S Mix	0.75	3.01	13.46	27	3.71	0.71		3.72	47.62
335	MA-023	1.71689	2.0866	5.58597	Muscovite	0.48	0.43	18.23	24.74	8.29			0.9	46.93
336	MA-024	1.35099	2.12916	5.90786	I/M Mix		2.42	13.46	26.12	8.27			3.3	46.43
337	MA-025	1.47137	1.43554	2.11386	Quartz		0.48	2.88	42.15	0.68			1.93	51.87
338	MA-026	1.42239	1.6698	5.46341	Feldspar	7.23		9.93	33.42					49.42
339	MA-027	2.12238	1.83905	2.53998	C/B Mix		7.05	13.18	19.71	1.58			13.54	44.95
340	MA-028	1.58348	1.48568	2.594	Feldspar	7.22	0.42	11.61	29.28	0.53	2.25		0.85	47.84
341	MA-029	1.45791	1.51272	2.63297	Chlorite	0.42	5.89	11.67	23.91	2.42	0.28		9.21	46.2
342	MA-030	1.01087	1.51181	1.76484	Smectite	5.53	1.76	10.35	30.29	0.92	0.57		2.35	48.22
343	MA-031	1.2369	1.70014	1.95783	Chlorite	0.71	7.95	11.09	22.3	1.24			11	45.72
344	MA-032	1.44449	1.8632	3.37225	Quartz		0.33	0.38	45.89				0.39	53.01
345	MA-033	1.51111	1.49713	2.45635	I/S Mix	0.71	2.67	14.53	26.27	5.35		0.47	2.62	47.39
346	MA-034	1.2955	1.47956	2.79316	Chlorite		8.62	12.64	16.48	0.64			18.04	43.58
347	MA-035	1.42892	1.5754	2.5954	Hi-Fe group		2.16	2.91	20.6	0.32	0.44	0.36	31.64	41.56
348	MA-036	2.3869	1.67757	2.92716	Chlorite		14.68	6.18	25.23	0.71	0.69		5.71	46.79
349	MA-037	1.14452	1.46502	5.0819	Biotite		8.89	10.37	21.05	4.58		0.73	9.73	44.65
350	MA-038	1.23134	1.44102	4.07854	I/M Mix	0.87	0.48	18.3	24.18	7.58		0.47	1.26	46.86
351	MA-039	2.31037	1.86178	4.32881	Chlorite		10.38	9.01	23.17	0.88			10.58	45.97
352	MA-040	1.88989	1.53909	2.00509	Feldspar	6.04		12.47	29.11		3.9		0.38	48.09
353	MA-041	1.69217	1.87682	4.13319	Quartz		0.56	1.52	43.99	0.4			1.13	52.4
354	MA-042	1.46944	2.11073	1.97149	Chlorite		9.35	12.76	17.64	0.44			15.12	44.3				0.39
355	MA-043	1.50238	2.16876	1.60072	Quartz		0.99	3.95	39.53	1.05	0.31		3.25	50.93
356	MA-044	1.56013	1.60026	2.37192	Chlorite		4.63	8.25	27.35	1.7	3.61		6.42	47.26		0.79
357	MA-045	1.34693	1.84418	3.40576	Illite		3	7.65	16.03	3.69		0.45	3.4	43.8					8.14								13.85
358	MA-046	1.03119	1.10908	2.37414	Quartz	1.42	0.71	3.47	40.07	0.98			2.42	50.94
359	MA-047	1.34496	1.56913	2.7118	Quartz		0.52	1.5	44.23	0.32			0.92	52.52
360	MA-048	1.17372	1.37073	4.3667	Illite		2.7	14.06	24.78	7.39		0.42	4.43	46.21
361	MA-049	2.10888	1.66341	2.85665	Chlorite		5.16	10.6	22.07	1.99	0.51	2.13	11.58	45.57		0.4
362	MA-050	1.20784	1.78914	2.72702	Quartz		0.64	1.55	43.95	0.47		0.26	0.69	52.44
363	MA-051	1.56345	1.73214	2.0228	Quartz		0.86	1.58	43.19	0.39			1.91	52.07
364	MA-052	1.65038	1.54796	3.07385	I/S Mix		3.81	10.74	28.02	2.7	0.86	0.47	5.75	47.66
365	MA-053	1.4849	1.77241	1.96842	Quartz		0.55	1.71	43.53	0.41			1.57	52.23
366	MA-054	1.37031	1.77923	2.56505	Carbonate		23.23	1.43	3.61		30.59		5.76	35.37
367	MA-055	1.71513	1.91499	2.11006	Kaolinite		0.46	20.2	27.57	0.87			0.73	50.17
368	MA-056	1.34113	2.97117	3.71326	Feldspar	9.8		9.71	31.83				0.24	48.41
369	MA-057	1.58376	1.51668	3.87287	Quartz	0.34		0.5	46.09					53.07
370	MA-058	1.2647	1.3076	2.16607	Illite		2.79	14.41	26.55	6.7			2.29	47.26
371	MA-059	1.07405	2.10102	1.32572	Feldspar	8.44	0.47	9.43	31.66	0.79	0.22		0.72	48.27
372	MA-060	1.60777	2.44631	1.44282	Quartz		1.01	4.23	40.52	0.83			1.85	51.56
373	MA-061	1.40863	1.65859	2.19503	Quartz		0.35	1.83	44.39	0.53		0.23		52.68
374	MA-062	1.97273	2.16493	2.52414	Quartz		0.91	2.29	42.79	0.72			1.23	52.06
375	MA-063	2.10569	1.63576	2.63731	Feldspar	8.47	0.76	10.09	31.18	0.19	0.55		0.39	48.37
376	MA-064	1.87213	2.53482	3.03919	Chlorite		13.57	5.64	25.59	0.65	0.34		7.58	46.63
377	MA-065	1.48012	2.0191	2.24672	Feldspar	7.5	0.66	10.11	31.72	0.45			0.91	48.65
378	MA-066	1.46095	1.77517	4.47162	Feldspar	5.99		12.65	29.3		3.81			48.24
379	MA-067	1.32231	1.34577	1.41733	Quartz		0.9	2.62	42.24	0.64			1.69	51.91
380	MA-068	1.25632	1.82036	1.6684	Smectite	6.96	1.96	10.43	29.54	0.83	0.6		1.84	47.84
381	MA-069	1.40786	1.21273	1.51315	Quartz		1.36	3.75	40.9	0.91			1.44	51.64
382	MA-070	1.6821	1.63363	3.07084	Feldspar	8.26	0.45	10.1	30.81	0.67	0.4		1.21	48.08
383	MA-071	1.45603	2.31479	2.10951	I/S Mix	2.49	2.51	11.55	21.11	1.41	0.28		16.38	44.28
384	MA-072	1.08411	1.8649	1.92556	I/S Mix	0.95	1.74	7.67	31.48	1.03	3.62	0.31	5	48.18
385	MA-073	1.31749	1.49914	2.98979	Feldspar	4.57		13.44	28.22	0.4	5.43			47.94
386	MA-074	1.21926	1.33071	1.83884	Quartz		1.22	2.49	42.48	0.71			1.07	52.02
387	MA-075	1.21057	1.70112	2.65204	Chlorite		4.95	7.84	28.18	2.23	0.93	0.27	7.84	47.34		0.41
388	MA-076	1.64357	2.31852	3.51735	Quartz				46.74					53.26
389	MA-077	1.14181	2.08992	5.06827	Feldspar			9.12	31.82	12.2				46.86
390	MA-078	1.60187	2.16141	1.74543	Quartz		0.58	1.36	44.26	0.33			0.98	52.5
391	MA-079	1.61255	2.47707	2.42176	Chlorite		13.65	12.87	16.82	0.59			11.45	44.63
392	MA-080	2.23876	1.71405	3.53438	Feldspar		1.07	15.35	25.6	8.25		0.91	2.11	46.72
393	MA-081	1.11103	2.09503	1.86315	Feldspar	7.73		10.36	31.62	0.63	0.31		0.82	48.53
394	MA-082	1.06734	1.77327	1.77293	I/S Mix		2.75	13.71	27.16	3.69	0.53		4.37	47.79
395	MA-083	1.48162	1.50181	1.81403	Hi-Ti group		0.62	3.61	6.42			46.06	1.11	42.18
396	MA-084	1.25922	1.60833	2.44059	C/B Mix		6.34	11.71	17.14	2.01			19.78	43.03
397	MA-085	1.20378	1.2454	1.75616	Quartz	0.62	0.89	3.83	40.08	0.79	0.35	0.33	1.9	51.21
398	MA-086	1.20093	1.4666	1.88072	I/S Mix		3.97	11.81	25.98	2.96	0.55		7.83	46.9
399	MA-087	1.17305	1.72794	5.32484	Feldspar	9.59		9.69	32.14					48.58
400	MA-088	1.47444	1.2396	2.9823	Smectite	5.76	2.14	12.07	29.28	0.45	0.65		1.25	48.4
401	MA-089	1.70129	1.57051	4.90882	Quartz		0.87	1.75	38.4	1.13			8.22	49.64
402	MA-090	1.26432	1.46252	3.00745	I/S Mix		4.15	11.62	23.75	3.81	0.63	0.68	9.62	45.74
403	MA-091	2.40459	1.95305	1.3603	I/M Mix	0.65	3.78	16.13	23.24	4.51			5.07	46.63
404	MA-092	1.6517	1.61153	2.79235	Chlorite		5.65	8.95	28.66	2.31	0.61		6.13	47.68
405	MA-093	1.64167	1.50201	2.89301	I/S Mix		2	14.48	27.38	4.99			3.33	47.83
406	MA-094	1.47406	1.79512	1.79442	Chlorite		6.25	13.73	20.34	1.09	0.41		12.81	45.38
407	MA-095	1.20136	1.6692	2.3562	Feldspar	0.59	0.5	9.27	30.63	11.55			0.5	46.33														0.63
408	MA-096	1.13946	1.67878	2.0147	I/S Mix	1.48	0.78	6.52	35.87	0.78	1.59		3.15	49.84
409	MA-097	1.23898	1.76042	3.05534	Quartz		0.61	3.65	41.39	0.85	0.35		1.41	51.73
410	MA-098	1.59745	1.90739	1.74523	Quartz		1.16	2.66	41.97	0.68			1.72	51.82
411	MA-099	1.29337	1.73455	2.67179	Feldspar	7.14		10.93	31.34		1.58		0.33	48.68
412	MA-100	1.24389	1.51927	2.28576	Feldspar	5.89	0.43	11.48	30.28	0.46	2.22		0.85	48.39
413	MA-101	1.20519	1.6732	1.82576	Feldspar	8.05	0.54	9.62	31.44	0.44	0.22		1.38	48.31
414	MA-102	1.39759	1.45647	5.50812	Quartz		0.58	1.56	43.94	0.49			1.06	52.38
415	MA-103	1.57088	2.1786	2.44746	Quartz		0.44	0.9	45.15	0.28			0.46	52.78
416	MA-104	1.57933	1.81555	2.44952	Feldspar	6.14	0.59	11.33	29.36	0.56	0.81	0.46	2.76	47.99
417	MA-105	1.42883	1.30543	3.84459	Quartz		0.73	4.43	39.77	1.63		0.38	1.93	51.14
418	MA-106	1.27391	1.786	3.52899	Chlorite		4.28	6.02	15.58	0.98	0.53	0.9	30.18	40.7		0.46		0.38
419	MA-107	1.18181	1.34208	3.36876	Quartz			1.81	44.64	0.27			0.52	52.75
420	MA-108	1.32498	1.31674	4.397	Chlorite		8.67	7.97	16.75	0.46	0.38		23.53	42.24
421	MA-109	1.72727	1.93558	9.76385	Biotite		8.13	10.42	19.66	5.01		1.06	11.86	43.85
422	MA-110	1.47371	1.67295	3.27679	I/S Mix		3.03	13.4	25.22	4.72		0.38	5.91	46.96		0.37
423	MA-111	1.1467	1.76334	1.98657	Quartz		0.4	0.7	45.22	0.35			0.59	52.73
424	MA-112	1.1457	1.60868	7.51612	I/M Mix		1.67	11.2	27.9	7.9			4.8	46.53
425	MA-113	1.60629	1.44822	2.34116	I/S Mix		3.07	10.11	20.75	2.19	13.86		2.83	45.05		2.14
426	MA-114	1.78338	1.42873	5.04279	I/M Mix		0.63	18.07	25.22	7.47			1.3	47.31
427	MA-115	1.01132	1.30094	2.78163	Feldspar		0.38	12.71	29.39	0.46	8.1		0.42	48.54
428	MA-116	1.30622	2.02462	3.02364	Biotite		8.54	9.69	20.25	3.45		0.89	12.98	44.19
429	MA-117	1.38142	1.89369	4.01138	I/M Mix	0.77	1.29	13.45	23	11.54	3.06		2.81	44.07
430	MA-118	1.14999	1.58992	3.42083	Feldspar	7.73	0.33	9.78	31.88	0.39	0.73		0.6	48.56
431	MA-119	1.08616	1.65587	2.31232	Chlorite		10.91	11	19.74	1.23	0.41	0.61	10.31	45.36		0.43
432	MA-120	1.35816	1.41661	5.44131	I/S Mix		4.93	12.5	25.98	4.6			4.96	47.03
433	MA-121	2.30212	1.63902	2.12638	Chlorite		4.72	5.88	23.04	0.5	6.19		15.74	43.93
434	MA-122	1.80792	1.84545	2.59475	Quartz		0.68	1.76	43.88	0.36			0.88	52.45
435	MA-123	2.45615	1.84811	7.10137	Chlorite	0.6	8.58	11.7	17.48	0.32			17.56	43.78
436	MA-124	1.7636	2.28386	2.81782	Feldspar		0.93	13.71	28.62	0.98	5.26		1.95	48.55
437	MA-125	1.58666	1.38529	1.5904	Chlorite		7.01	10.5	25.92	1.8	0.65	0.45	6.48	47.19
438	MA-126	1.38789	1.92814	4.08937	Chlorite		13.13	11.82	18.36	0.63			11.09	44.96
439	MA-127	1.84185	1.76533	1.6025	Quartz		0.48	1.1	45				0.6	52.82
440	MA-128	2.68881	2.06818	6.72398	Illite		2.51	13.48	26.9	7.79			2.41	46.92
441	MA-129	1.63721	1.74834	2.77743	Quartz		0.4	1.16	44.37	0.32			1.29	52.46
442	MA-130	1.20517	1.46377	2.41564	I/S Mix		2.51	15.54	26.11	5.48			2.8	47.55
443	MA-131	1.35568	1.72795	3.4874	I/M Mix		1.34	16.93	28.03	4.84				48.86
444	MA-132	2.27012	1.89654	3.60873	Chlorite		11.41	12.04	19.44	1.05			10.83	45.23
445	MA-133	1.95472	2.06329	5.04499	Quartz		0.24	0.44	46.04	0.24				53.05
446	MA-134	1.6392	1.64373	2.29738	Quartz		0.34	0.88	45.32				0.57	52.89
447	MA-135	1.96209	1.36589	3.68155	Feldspar	0.6		9.63	31.28	11.26		0.31		46.92
448	MA-136	1.53039	1.65919	2.19432	Feldspar	1.22	0.9	14.44	27.03	0.87	0.82		6.68	48.03
449	MA-137	2.30359	1.94356	8.1791	Chlorite	1.01	4.42	6.15	20.9	1.36	7.55	0.58	14.94	42.74				0.35
450	MA-138	1.6959	1.82766	4.44629	Chlorite		10.28	12.99	16.7	0.41	0.7		14.84	44.08
451	MA-139	1.15863	1.71828	3.34747	Hi-Fe group			0.69	1.33			8.55	57.06	32.37
452	MA-140	1.30138	3.26095	3.79392	Unknown		23.31	1.77	3.71		34.26		1.5	35.46
453	MA-141	1.19611	1.65086	4.74351	Feldspar	5.85		11.97	29.55	0.28	4.24			48.1
454	MA-142	1.44228	1.468	3.02688	Feldspar	0.61	0.29	9.97	33.33	0.25	5.38		0.51	49.66
455	MA-143	1.11697	1.75	2.59362	Unknown			12.53	19.7		15.7		8.53	43.53
456	MA-144	1.1796	1.8615	4.73678	Illite		1.77	15.1	26.16	6.7			3.15	47.12
457	MA-145	1.55773	1.90866	1.78876	Feldspar		0.59	9.3	31.59	10.53			0.82	47.16
458	MA-146	1.18007	1.63037	1.64327	Quartz		0.35	1.52	44.5	0.34			0.65	52.63
459	MA-147	1.3543	1.9002	1.82879	I/S Mix	0.66	3.39	12.67	22.03	3.28	0.4		12.53	45.04
460	MA-148	1.30931	1.52949	2.21577	Feldspar	8.62		10.48	31.36		1.06			48.48
461	MA-149	1.47949	2.18407	1.47313	Quartz		0.79	2.06	43.47	0.38			0.94	52.36
462	MA-150	1.31794	1.4481	1.87282	Feldspar	8.62		10.19	31.58		0.56		0.55	48.5
463	MA-151	1.39505	1.61805	1.83812	Quartz		0.69	1.09	44.71				0.81	52.7
464	MA-152	1.22089	1.9504	1.73914	Quartz		0.38	1.17	45.21	0.36				52.87
465	MA-153	1.26961	2.5241	2.51599	I/S Mix	6.6	1.09	9.96	30.38	1.06	0.64		2.32	47.95
466	MA-154	1.11478	1.17376	1.90669	Feldspar	9.34	0.26	9.3	31.97	0.28			0.47	48.37
467	MA-155	1.41605	1.2508	5.27705	I/M Mix	1.82	1.14	18.25	24.42	5.34	0.65		1.12	47.27
468	MA-156	1.41233	1.3336	1.69969	Quartz		0.51	2.85	43.06	0.51			0.71	52.35
469	MA-157	1.14154	1.38629	1.65069	Quartz		0.38	1.74	44.47				0.67	52.75
470	MA-158	1.27438	1.65075	1.86566	Smectite	6.52	2.86	9.96	29.68	0.36	0.27		2.35	48.01
471	MA-159	1.19516	1.12578	4.58205	Unknown		0.36	3.39	3.99	0.88	28.54	2.03	0.63	40.94					15.44			3.79
472	MA-160	1.41333	1.65198	3.95384	Quartz		0.27	1.51	44.65	0.33			0.55	52.69
473	MA-161	1.21194	1.85676	2.66379	C/B Mix	0.64	13.67	5.82	16.19	0.98	18.55		2.59	41.56
474	MA-162	2.04626	1.67476	1.32221	Quartz			1.69	44.04				1.82	52.46
475	MA-163	1.02594	1.54004	1.59841	I/S Mix		2.77	12.77	27.86	4.91			4.03	47.66
476	MA-164				Chlorite		6.47	12.09	23.58	1.5			9.93	46.44
477	MA-165	1.2959	2.11944	2.32905	Quartz		0.47	2.24	43.27	0.83			0.99	52.2
478	MA-166	1.95337	1.55021	5.95457	Quartz				46.74					53.26
479	MA-167	1.3231	2.24246	1.49654	Quartz		0.87	2.42	41.38	0.82			3.12	51.38
480	MA-168	1.31494	1.7831	2.32357	Feldspar	8.14	0.45	9.4	32.09	0.38	0.33		0.68	48.54
481	MA-169	1.62458	1.61744	3.01791	Quartz		0.36	0.72	45.5				0.49	52.93
482	MA-170	2.66137	1.79815	4.9857	Muscovite		0.88	15.69	25.13	8.75			3.21	46.34
483	MA-171	1.59606	1.50741	1.65646	Feldspar	0.72	0.46	9.43	31.71	9.76			0.61	47.32
484	MA-172	1.49698	1.59898	1.18272	Feldspar	8.93		9.98	31.57	0.32			0.83	48.37
485	MA-173	1.14391	1.64012	2.09123	I/S Mix		3.14	9.78	28.75	1.62	1.36	0.61	6.94	47.79
486	MA-174	1.28851	1.42359	2.01318	Feldspar		0.53	11.46	29.94	1.14	1.23		0.45	48.06
487	MA-175	1.68429	1.64272	1.88632	Quartz		1.54	3	40.7	0.83			2.61	51.33
488	MA-176	1.21462	1.43373	2.47638	I/S Mix		3.14	11.33	27.11	4.24	0.58	0.49	6.04	47.06
489	MA-177	1.2411	1.75113	1.21265	Feldspar	9.61	0.4	9.84	30.92	0.31			0.9	48.03
490	MA-178	1.06076	1.3636	2.63512	Chlorite		5.66	10.58	24.64	1.67			11.12	46.33
491	MA-179	3.18491	1.91232	2.8174	Chlorite		8.39	11.31	17.11				19.66	43.52
492	MA-180	1.28565	1.71491	3.24464	Chlorite		6.56	9.7	25.28	2.86			9.27	46.32
493	MA-181	1.40489	1.91274	1.72383	Feldspar	7.76		11.5	29.91	0.36	2.42			48.05
494	MA-182	1.54531	1.98909	1.87839	Quartz		0.54	1.72	43.59	0.55			1.37	52.24
495	MA-183	1.27236	1.67607	1.93365	Chlorite		11.36	11.94	18.92	0.95			11.89	44.95
496	MA-184	1.71586	1.74857	1.84223	Chlorite		10.01	1.85	27.02	0.26	6.81		8.59	45.47
497	MA-185	1.76309	1.97532	2.37467	Quartz		0.64	1.85	43.81	0.59			0.7	52.4
498	MA-186	1.72339	1.52876	2.68405	Quartz		1.23	5.38	39.35	1.83			0.97	51.23
499	MA-187	2.17538	1.72477	4.76429	Smectite	2.02	1.25	14.28	28.26	1.32	0.61	0.79	2.82	48.67
500	MA-188	1.01767	1.33715	2.41203	Unknown		0.41	4.11	35.52			2.16	8.37	49.43
501	MA-189	1.18112	1.53178	1.31087	Feldspar	8.23	0.67	10.12	30.57	0.84	0.38		1.2	47.98
502	MA-190	1.38626	1.59575	2.10208	Quartz		0.62	0.99	44.31				1.61	52.47
503	MA-191	1.30525	1.47753	2.64427	Quartz		0.75	2.03	43.16	0.76		0.33	0.79	52.18
504	MA-192	1.00311	1.53924	1.33738	Feldspar	8.71	0.56	9.69	31.41	0.76			0.65	48.23
505	MA-193	1.64436	1.74889	1.18717	Quartz		1	2.2	42.76	0.57			1.43	52.05
506	MA-194	1.32928	1.64674	2.56553	Carbonate		20.81	2.02	4.85		29.1		7.41	35.81
507	MA-195	1.52018	1.80267	2.02163	Quartz		0.6	1.66	43.5	0.44			1.59	52.21
508	MA-196	2.71053	1.47186	2.82072	I/S Mix		3.87	11.08	27.41	2.56	1	0.45	6.13	47.49
509	MA-197	1.36473	1.68026	2.61149	I/S Mix		1.54	12.09	27.52	1.64	0.8	0.83	7.85	47.71
510	MA-198	1.87452	2.14216	2.18729	Kaolinite			20.56	27.64	0.93			0.64	50.24
511	MA-199	1.24956	2.40008	3.65025	Feldspar	9.31		9.6	32.4					48.69
512	MA-200	1.52594	2.15486	3.9403	Quartz			0.57	46.25					53.19
513	MA-201	1.30308	1.34233	2.17778	C/B Mix		6.3	10.16	27.08	2.35	0.49	0.53	5.13	47.43				0.54
514	MA-202	1.52038	1.26386	3.376	C/B Mix	3.15	4.01	9.44	28.69	3.51			3.95	47.24
515	MA-203	1.21951	1.46876	3.26873	Quartz		0.28	0.54	46.05					53.13
516	MA-204	1.43028	1.8131	1.85507	Hi-Ti group	0.51	1.73	6.65	16.08	2.17		26.15	2.27	44.44
517	MA-205	2.18135	1.81183	3.81664	Chlorite		6.92	12.55	15.29	0.33			22.17	42.73
518	MA-206	1.2011	1.36024	2.27494	Quartz		0.51	1.53	44.51	0.29			0.5	52.67
519	MA-207	1.28984	1.39122	2.58902	Muscovite		1.18	16.4	24.86	8.65		0.4	1.94	46.56
520	MA-208	1.29883	1.54321	3.92282	Hi-Fe group		0.66	2.12	4.31	0.3	0.48		55.93	32.57				3.64
521	MA-209	1.0912	1.62691	1.96564	Quartz		0.47	3.26	41.73	0.57		0.6	1.48	51.9
522	MA-210	1.4818	1.30506	1.62442	I/S Mix	0.85	1.2	6.91	23.42	1.82	0.47		21.58	43.75
523	MA-211	1.13407	1.39424	2.05729	Quartz			0.45	46.06				0.43	53.06
524	MA-212	1.13696	1.39478	1.65836	C/B Mix		6.62	10.91	26.46	1.6	0.51	0.26	6.11	47.53
525	MA-213	1.88261	1.41298	1.71996	Unknown		5.02	11.93	18.1	0.65	4.23		16.59	43.48
526	MA-214	1.19498	1.86759	1.88868	I/S Mix		3.83	12.28	26.93	2.56	0.63		6.2	47.56
527	MA-215	1.18659	1.49762	4.90045	Quartz				46.74					53.26
528	MA-216	1.29679	1.69898	1.81694	Chlorite	1.92	3.36	17.21	22.54			0.31	7.4	47.25
529	MA-217	1.35276	1.33047	2.27933	Quartz		0.49	2.56	43.26	0.78			0.61	52.3
530	MA-218	1.27094	1.47611	5.61558	Chlorite		8.51	12.19	16.96	0.29			18.35	43.7
531	MA-219	1.22198	1.34902	2.10892	Feldspar	8.79	0.53	9.66	31.72				0.82	48.49
532	MA-220	1.38081	1.23943	2.81243	Hi-Ti group		1.35	3.72	5.4	0.23	0.28	43.93	3.67	41.42
533	MA-221	1.1186	1.92509	4.52899	Chlorite		7.21	12.69	16.22	0.51	0.38	0.34	19.35	43.3
534	MA-222	1.44394	1.3964	5.57733	Illite		1.13	12.88	29.84	5.89			2	48.26
535	MA-223	1.70117	1.8857	2.54387	Illite		2.71	13.53	26.82	6.13			3.62	47.19
536	MA-224	1.86175	1.50564	5.51993	Illite		2.13	14.37	26.05	7.49			3.19	46.77
537	MA-225	1.2697	1.23819	1.66534	Feldspar	5.95	0.81	10.23	30.49	3.01	0.79		0.95	47.78
538	MA-226	1.49197	1.20281	6.52077	Chlorite		13.33	11.31	16.48				14.54	43.97				0.37
539	MA-227	1.06459	1.48909	2.15947	I/M Mix		1.05	16.62	25.21	7.08		1.1	1.79	47.15
540	MA-228	1.1383	1.13941	1.82239	Chlorite		12.23	6.21	27.98	1.03	0.92		3.92	47.71
541	MA-229	1.23607	1.72907	3.56131	Biotite	0.45	5.89	8.47	26.57	4.15		0.63	7.51	46.33
542	MA-230	1.42598	1.37081	4.95377	Muscovite		0.75	17.73	25.16	8.06			0.59	47.06
543	MA-231	1.86565	2.21111	3.51047	Quartz	0.48	0.93	2.3	42.57	0.51			1.25	51.97
544	MA-232	1.62931	1.55533	1.8079	Quartz		1.67	3.02	40.44	0.47			3.12	51.29
545	MA-233	1.53754	1.88499	4.4509	Quartz	0.72	0.7	2.83	42.21	0.76			0.9	51.87
546	MA-234	1.22334	1.46811	2.07936	Feldspar		0.37	10.17	31.11	10.07			1.03	47.24
547	MA-235	1.10708	1.54803	2.21945	Quartz		0.67	2.01	43.37	0.39		0.37	0.85	52.34
548	MA-236	1.1916	1.29219	2.63711	Quartz		1.11	5.36	38.99	2.11		0.35	1.05	51.03
549	MA-237	1.32463	1.26332	3.8375	I/S Mix		1.56	14.99	25.86	4.91		0.33	4.48	47.51		0.36
550	MA-238	1.74035	1.63244	3.05704	Illite		2.17	13.93	25.88	8.11			3.46	46.45
551	MA-239	1.54063	1.43707	3.47833	Illite		2.13	14.78	25.71	6.35			4.11	46.91
552	MA-240	1.49742	2.1957	3.28771	Quartz		0.58	4.19	41.66	0.92			0.62	52.03
553	MA-241	1.17744	1.43741	2.11774	Feldspar	5.6	0.57	12.23	29.21	0.58	2.96		0.74	48.1
554	MA-242	1.04172	1.37114	3.42023	Smectite	6.96	1.68	10.37	28.87	0.69			3.94	47.48
555	MA-243	1.66537	1.6581	2.24272	Quartz		0.34	1.21	44.8	0.36			0.6	52.68
556	MA-244	2.36139	2.59755	3.05038	I/M Mix	0.89	0.62	17.29	25.66	6.35		0.53	1.19	47.49
557	MA-245	1.48146	1.71401	4.00961	Muscovite		1.06	15.35	25.57	8.89			2.67	46.45
558	MA-246	1.15791	1.43667	2.10156	Chlorite		0.87	17.18	27.34	0.8	0.68		3.98	49.15
559	MA-247	1.27458	1.21933	2.36616	Quartz		0.54	1.52	44.36	0.26			0.71	52.61
560	MA-248	1.10327	1.95623	1.75133	Quartz		0.56	1.44	44.45	0.36			0.58	52.61
561	MA-249	1.69477	1.64341	3.39802	Chlorite		7.44	13.41	18.26	0.95			15.16	44.43				0.35
562	MA-250	1.52826	1.61734	3.00035	Quartz		0.43	1.72	44.24	0.34			0.7	52.58
563	MA-251	1.26138	1.42509	2.60216	Illite		3.18	11.65	27.47	5.59			5.05	47.06
564	MA-252	1.14897	1.34135	3.72538	Quartz	0.37	0.25	0.94	45.35	0.25				52.85
565	MA-253	1.44093	1.38412	3.793	C/B Mix		5.59	13.01	24.22	2.89	0.66		6.94	46.68
566	MA-254				Feldspar	5.25	0.7	9.02	33.06	1.1			1.87	49
567	MA-255	1.17384	1.39841	1.64498	C/B Mix		5.5	9.81	28.38	2.01	0.75		5.72	47.84
568	MA-256	1.77791	2.2986	4.35676	Muscovite		1.43	16.19	24.82	7.98		0.92	1.96	46.7
569	MA-257	1.13789	1.429	2.15658	Feldspar	6.87		12.32	29.35	0.41	2.99			48.06
570	MA-258	1.22579	1.54369	2.77702	Feldspar			13.16	28.75	10.8			0.44	46.85
571	MA-259	1.1163	1.39845	2.60205	Quartz		0.45	0.48	45.58	0.27			0.36	52.86
572	MA-260	1.33228	1.47354	2.0473	Quartz		0.52	2.08	43.63	0.61			0.8	52.37
573	MA-261	1.23378	1.55438	1.75649	Smectite		1.22	14.91	27.88	1.07		0.36	5.79	48.77
574	MA-262	1.88831	1.66425	2.30746	Feldspar	4.64	0.47	10.22	31.22	3.42	1.07		0.87	48.09
575	MA-263	1.1304	1.58787	0.976931	C/B Mix		12.9	7.38	26.03	1.04	0.56	0.82	3.91	47.37
576	MA-264	1.15245	1.23894	2.48355	Quartz		0.36	0.97	45.18	0.32			0.37	52.8
577	MA-265	2.2242	1.50477	3.41702	Biotite		8.01	10.32	23	5.6		0.51	7.3	45.27
578	MA-266	1.3891	1.3757	2.09139	Feldspar	8.33	0.47	9.68	31.91	0.45			0.63	48.53
579	MA-268	1.5856	1.74952	8.18718	Quartz				46.74					53.26
580	MA-269	1.18089	1.69521	2.00013	Quartz		0.69	1.68	43.75	0.67			0.89	52.32
581	MA-270	1.53136	1.56848	1.34648	Chlorite		6.81	12.56	21.06	2.13			12.15	45.3
582	MA-271	1.60123	1.545	3.14458	Chlorite		5.04	9.98	27.71				9.44	47.82
583	MA-272	2.15526	1.50061	5.31839	Illite		3.19	11.39	27.36	5.96			5.23	46.87
584	MA-273	1.65291	1.36968	8.39587	Biotite		5.91	9.89	20.32	5.7		1.66	12.87	43.65
585	MA-274	1.51005	1.88861	4.55251	Unknown		1.03	13.31	20.71	0.52	13.75		6.27	44.4
586	MA-275	2.85334	1.94752	2.2465	Chlorite		4.36	8.5	15.36	1.32	6.64		23.06	40.76
587	MA-276	1.61452	1.33728	3.27558	I/M Mix	0.53	1.64	15.9	25.89	6.4			2.39	47.24
588	MA-277	1.22407	1.1794	3.87413	Chlorite		6.56	11.86	20.16	1.93			14.87	44.62
589	MA-278	1.4943	1.4715	10.9484	Biotite		7.58	9.3	19.67	6.87		1.22	12.21	43.14
590	MA-279	1.79235	1.55248	3.79017	Chlorite		6.45	9.54	19.05	1.52			20.07	43.37
591	MA-280	1.00189	1.54729	4.95058	Muscovite		1.21	16.8	24.83	8.03		0.32	2.05	46.76
592	MA-281	1.14554	1.28387	5.03686	Quartz			0.7	45.67				0.68	52.95
593	MA-282	1.00622	1.66298	2.43437	Quartz		0.42	0.88	44.84	0.52			0.76	52.58
594	MA-283	1.25757	1.62238	1.11881	Quartz		1	2.39	42.45	0.68		0.33	1.16	52
595	MA-284	1.15347	1.34173	1.82062	C/B Mix		10.08	9.2	24.73	3.2		0.87	5.38	46.54
596	MA-285	1.85786	1.52039	2.65797	Quartz		0.61	5.89	39.43	1.42			1.24	51.39
597	MA-286	1.47763	1.65886	2.76289	Feldspar	7.59		10.14	31.98	0.44	0.33		0.83	48.68
598	MA-287	1.0999	1.34295	1.2095	Biotite		4.97	11.31	23.81	3.5		0.79	9.73	45.89
599	MA-288	1.27675	1.78935	1.31029	Quartz			0.73	46.1					53.17
600	MA-289	1.10044	1.30055	1.83018	I/S Mix		2.42	14.96	26.57	5.27			3.18	47.61
601	MA-290	1.73443	2.40689	2.21435	Muscovite		2.69	15.07	24.95	7.05			3.63	46.6
602	MA-291	1.19266	1.43859	1.0841	Quartz		0.93	3.3	40.54	1.08		0.46	2.38	51.3
603	MA-292	1.25566	1.79509	2.21491	I/S Mix	0.55	3.67	11.16	26.36	3.03	0.68	0.52	6.08	47.34		0.62
604	MA-293	3.45189	2.18318	1.76627	Feldspar	1.64	0.93	15.42	26.11	5.79		0.78	2.09	47.24
605	MA-294	1.67278	1.86952	1.40414	Chlorite		10.53	13.53	15.69				16.37	43.88
606	MA-295	1.24718	1.20514	2.5378	Chlorite		6	10.95	14.27				27.17	41.62
607	MA-296	1.04639	1.56307	2.78725	Muscovite		1.28	16.55	25.94	7.6			1.37	47.26
608	MA-297	1.43345	2.06628	2.31232	Feldspar	1.17		9.29	31.79	10.69				47.07
609	MA-298	1.09577	1.2405	1.58467	Quartz		0.67	1.82	43.26	0.99			1.2	52.06
610	MA-299	1.44116	1.21638	0.979759	Quartz			1.62	44.34	0.83			0.75	52.45
611	MA-300	1.71161	1.48465	2.44693	Hi-Fe group			5.36	7.69	0.65			49.68	35.97		0.65
612	MA-301	1.53092	1.77409	2.86747	Quartz			2.09	43.57	0.49			1.59	52.27
613	MA-302	1.40167	1.94285	2.5361	Biotite		4.52	7.66	20.42	4.92			19.89	42.6
614	MA-303	1.22138	1.71051	1.47626	Feldspar		1.18	15.17	27.47	6.83			1.67	47.68
615	MA-304	1.38792	1.5848	1.36121	Illite		2.5	13.93	25.83	6.48			4.53	46.73
616	MA-305	1.30134	1.40206	1.70272	Chlorite		7.13	11.58	19.18	0.83		0.73	16.13	44.43
617	MA-306	1.14187	1.48958	1.60376	Muscovite		1.2	16.37	25.85	7.79			1.67	47.11
618	MA-307	1.25816	1.91791	1.70383	C/B Mix		5.56	12.6	26.51	6			2.12	47.21
619	MA-308	1.02478	1.27568	1.0899	I/S Mix		1.98	13.97	24.19	3.84			9.75	46.27
620	MA-309	1.35292	1.87473	1.1482	Illite		1.39	15.01	26.17	7.9			2.68	46.85
621	MA-310	1.43254	1.62858	1.36943	Illite		3.4	11.37	24.3	5.72			9.79	45.42
622	MA-311	1.8286	2.20889	1.44788	Feldspar	4.85	0.61	12.96	27.79		4.97		1.08	47.73
623	MA-312	1.0459	1.40658	1.95269	Illite		2.12	13.18	28.23	5.84			2.91	47.72
624	MA-313	1.63389	1.39504	1.40937	Feldspar			16.31	28.24	7.27				48.17
625	MA-314	1.10866	1.22457	1.17368	Illite	1.23	1.56	14.51	27.28	6.44			1.56	47.42
626	MA-315	2.05045	1.64606	1.90662	Chlorite		10.13	11.43	22.03	0.73	0.51		7.73	46.71		0.73
627	MA-316	1.21946	1.31372	1.56128	I/S Mix		2.76	13.18	27.01	4.8			4.88	47.38
628	MA-317	1.29024	1.36503	1.21849	I/S Mix		4.35	12.88	22.19	3.8		0.49	10.91	45.39
629	MA-318	1.3517	1.36741	1.57557	I/S Mix		1.67	13.94	27.2	3.63	0.82		5.03	47.71
630	MA-319	1.43349	1.43332	1.0243	Chlorite	1.03	7.62	5.35	24.38	0.79	6.29		9.78	44.77
631	MA-320	1.75432	1.26681	3.20102	Quartz			0.26	46.39	0.23				53.12
632	MA-321	2.12582	1.66856	1.97103	I/S Mix		1.52	8.63	30.86	1.51	1.67		7.68	48.12
633	MA-322	1.75349	1.49207	1.2659	Quartz		0.57	1.16	45.28					52.99
634	MA-323	2.00854	1.68973	2.39792	Illite	1.75	1.16	10.17	30.73	5.36			3	47.82
635	MA-324	1.32831	1.54588	3.8921	Feldspar		0.27	9.17	32.06	10.92			0.34	47.24
636	MA-325	1.48604	1.2817	3.26151	Quartz		0.5	0.98	44.88	0.37			0.61	52.67
637	MA-326	1.56522	1.94747	1.4936	Illite		1.84	14.64	26.53	7.18			2.73	47.09
638	MA-327	1.56501	1.12951	1.30439	Smectite		3.22	10.64	29.09		1.54		7.13	48.39
639	MA-328	1.29814	1.37331	2.85504	Quartz			0.41	46.38					53.21
640	MA-329	1.99254	1.61672	1.17348	Feldspar	3.96	0.67	11.34	26.21	0.46	7.02		3.96	46.37
641	MA-330	1.41683	1.41214	1.76951	Hi-Ti group		1.33	5.43	10.62	2.1		35.34	2.34	42.84
642	MA-331	1.32256	1.31375	3.29488	Biotite		5.44	9.42	24.14	3.22		1.14	11.02	45.62
643	MA-332	1.63325	2.02604	5.81081	Biotite		6.56	10.07	19.83	4.42			15.64	43.49
644	MA-333	1.25079	1.67636	2.51534	I/S Mix		4.64	11.91	22.81	3.87	0.59	0.52	10.25	45.41
645	MA-334	1.1615	1.69819	4.83631	Quartz	0.72		1.73	43.97	0.42	0.3		0.55	52.32
646	MA-335	1.17743	1.82108	1.40545	Feldspar	4.72		12.77	29.14		5.12			48.25
647	MA-336	1.42389	1.58309	2.95078	I/S Mix	0.9	1.62	16	26.89	4.81			1.78	48
648	MA-337	1.32574	1.73542	2.29331	Quartz			0.84	45.58	0.27			0.41	52.9
649	MA-338	2.46496	2.28408	4.20127	Smectite		3.08	11.42	28.25		2.29		6.76	48.19
650	MA-339	2.67839	1.6806	5.01337	Chlorite	2.02	4.3	18.52	21.21			0.57	6.17	47.2
651	MA-340	1.47077	1.84634	2.47573	Quartz		0.38	1.28	44.77	0.25			0.61	52.71
652	MA-341	1.09718	1.52119	2.31411	Quartz		0.31	0.54	46.03					53.12
653	MA-342	1.41089	1.36587	2.21172	I/M Mix			17.12	26.4	6.87			2.03	47.58
654	MA-343	1.51967	2.51587	1.94748	C/B Mix		1.19	15.2	24	2.24			10.68	46.69
655	MA-344	3.32908	1.89239	2.4291	Chlorite		10.8	11.32	18.26	0.6			14.63	44.39
656	MA-345	1.27798	1.33523	1.76946	Chlorite		10.33	11.69	16.13				18.38	43.47
657	MA-346	1.17669	1.73775	1.67472	Chlorite		5.33	13.08	22.61	2.42			10.61	45.95
658	MA-347	1.16746	1.91199	3.96996	Chlorite		8.33	12.93	16.6	0.94			17.56	43.63
659	MA-348	2.57722	1.46148	1.6786	Feldspar	8.71	0.59	9.44	31.6	0.69			0.71	48.26
660	MA-349	1.7039	1.5876	3.00284	Chlorite		6.51	12.75	16.02	0.43	0.3		20.92	43.07
661	MA-350	1.21843	1.7831	1.44275	Quartz		0.51	1.27	44.17	0.43			1.23	52.4
662	MA-351	1.32445	1.4799	4.14408	Muscovite		0.93	16.14	26.26	7.9			1.6	47.18
663	MA-352	1.3112	1.45953	2.8254	Muscovite			17.41	25.91	8.48			1.02	47.18
664	MA-353	1.77449	1.73303	2.61046	Illite		2.07	14.25	27.08	6.86			2.42	47.33
665	MA-354	1.14235	1.53507	1.62792	Illite		3.39	14.19	26.07	5.87			3.3	47.17
666	MA-355	1.51474	1.4835	1.90066	Biotite		5.15	9.51	28.09	3.44			6.47	47.34
667	MA-356	1.35973	1.29031	1.38124	Chlorite		8.36	11.83	22.01	2.36			9.69	45.75
668	MA-357	1.29448	1.2858	1.83526	Feldspar	7.16		11.64	29.92		2.69		0.42	48.18
669	MA-358	1.28637	1.31946	1.45608	Feldspar	7.98		10.96	30.74	0.28	1.74			48.3
670	MA-359	1.10118	1.22017	5.01555	Feldspar	7.66		9.68	33			0.47		49.19
671	MA-360	1.22284	1.46863	1.38724	I/S Mix		4.32	11.81	25.4	3.41		0.58	7.77	46.71
672	MA-361	1.96979	1.58706	4.55048	Biotite		7.38	9.71	19.36	7.21		0.79	12.6	42.96
673	MA-362	1.40297	1.50464	3.96883	Illite		1.65	13.56	27.6	6.66			3.2	47.33
674	MA-363	1.61527	1.37236	1.9085	Chlorite		11.6	9.04	23.75	1.59			7.68	46.35
675	MA-364	1.82537	1.62026	2.42306	Kaolinite			19.71	28.19				1.72	50.38
676	MA-365	1.26593	1.61031	1.96774	I/S Mix		2.12	14.77	26.19	2.07			7.03	47.82
677	MA-366	1.15107	1.19268	1.46333	Feldspar		0.38	9.23	31.97	9.99			1.06	47.38
678	MA-367	1.36379	1.84643	2.35392	Quartz		0.56	1.83	43.94	0.7			0.53	52.43
679	MA-368	1.22503	1.61881	1.27376	Chlorite		3.02	4.44	36.7	0.92		0.39	4.43	50.1
680	MA-369	1.58783	1.57188	1.65372	Quartz		0.51	1.36	45.14					52.98
681	MA-370	1.27874	1.33387	2.00241	I/S Mix		2.72	11.16	25.24	2.81	0.76	0.49	9.31	46.78		0.74
682	MA-371	1.81718	1.40676	0.985176	Carbonate		23.54	1.61	24.87				3.31	46.67
683	MA-372	1.971	1.605	1.95466	Illite		2.09	12.87	26.42	7.08			5	46.53
684	MA-373	1.71926	1.37366	1.28166	Feldspar	8.14		10.14	31.52		0.9	0.71		48.59
685	MA-374	1.14867	1.56591	1.47313	Feldspar	1.17		8.9	32.51	10.01				47.41
686	MA-375	1.21138	1.4246	1.60595	Biotite	1.01	6.1	11.04	24.79	3.65			7.15	46.25
687	MA-376	1.9655	1.3514	1.84845	Quartz			1.76	44.25	0.6			0.9	52.49
688	MA-377	1.03244	1.23523	1.66304	Quartz		0.53	0.91	44.95				0.87	52.74
689	MA-378	1.68165	1.44267	1.6272	Smectite	7.69	1.22	8.83	31.76	0.45			1.7	48.34
690	MA-379	1.298	1.39542	2.87624	Feldspar			15.35	25.72	7.71			4.67	46.54
691	MA-380	5.30527	2.49989	4.06686	Quartz			0.73	46.1					53.17
692	MA-381	1.54282	1.53651	2.12704	Quartz		0.53	3.12	42.17	1.11			1.18	51.9
693	MA-382	1.73584	1.64292	2.57169	Chlorite		10.14	10.21	17.82				18.03	43.8
694	MA-383	1.40429	1.61017	1.26338	I/S Mix		4.57	12.98	24.85	4.65			6.39	46.56
695	MA-384	1.60767	1.50261	3.69602	Muscovite		2.07	16.02	24.75	7.32			3.18	46.67
696	MA-385	1.46207	1.3423	1.93783	Illite		1.32	13.59	28.79	6.19			2.17	47.95
697	MA-386	1.25387	1.63172	1.79548	Feldspar	6.75		11.7	29.97		3.34			48.24
698	MA-387	1.14431	2.09232	1.55161	Quartz		0.98	2.67	42.17	0.65			1.63	51.9
699	MA-388	1.87514	1.59587	4.03312	Chlorite		8.79	12.22	17.06				18.08	43.85
700	MA-389	1.11393	1.44445	1.92475	Smectite		1.43	14.23	31.29	0.81			1.98	50.26
701	MA-390	1.61438	1.53507	1.27419	Chlorite	1.49	8.2	7.48	23.73		5.11		8.62	45.36
702	MA-391	1.39653	1.43662	4.90734	Muscovite		1.44	15.74	25.41	7.81		0.59	2.18	46.83
703	MA-392	1.90178	2.01917	4.98919	Muscovite		1.52	15.98	25.59	7.89			2.13	46.89
704	MA-393	1.62161	1.34596	2.39178	I/M Mix		1.96	15.56	25.92	6.86			2.54	47.16
705	MA-394	1.11438	1.16727	1.71688	Feldspar	9.66		9.94	30.71	0.41	0.48		0.93	47.87
706	MA-395	2.1496	2.16432	2.46436	Biotite		4.89	11.71	22.53	3.58		1.13	10.77	45.41
707	MA-396	1.14842	1.62962	3.06197	C/B Mix		7.2	11.08	25.67	3.98			5.18	46.88
708	MA-397	2.11583	1.88085	3.10265	Feldspar			14.21	30.55	6.48				48.76
709	MA-398	1.31939	1.24133	1.59241	Feldspar	8.75		10.15	32.27					48.83
710	MA-399	2.49538	1.80401	1.77254	I/S Mix		2.41	14.05	27.26	3.23			5.08	47.97
711	MA-400	1.75077	1.49627	3.44727	Biotite		5.33	8.49	20.33	4.37		0.89	17.4	43.19
712	MA-401	1.06996	1.23638	6.80331	Muscovite	0.57	0.85	16.99	25.08	8.3			1.43	46.77
713	MA-402	2.83951	1.85237	1.67115	Feldspar			12.58	30.49	0.98	7.01			48.93
714	MA-403	1.20965	1.33544	3.75557	Quartz			0.38	46.4					53.21
715	MA-404	2.51994	1.77743	3.00457	I/S Mix		4.55	13.75	23.7	5.49			6.4	46.1
716	MA-405	1.25269	1.67294	8.67785	Illite		1.74	15.22	25.54	8.17			2.71	46.62
717	MA-406	1.62022	1.55782	3.78416	Chlorite		5.57	6.83	21.9	0.9	7.31	0.64	13.03	43.82
718	MA-407	1.64957	1.52181	5.80667	Quartz		0.48	1.7	43.92	0.57		0.8		52.52
719	MA-408	1.56423	1.3862	2.89875	Quartz		0.6	1.54	44.92					52.94
720	MA-409	2.07043	1.65019	3.99598	Quartz				46.74					53.26
721	MA-410	1.26223	1.21364	4.11918	Quartz				46.74					53.26
722	MA-411	1.4879	1.61228	1.91339	Feldspar	0.76	0.68	9.49	30.32	10.97			1.27	46.5
723	MA-412	1.34505	1.75945	1.96432	Quartz			3.29	41.43	0.76	0.53		2.44	51.54
724	MA-413	1.58129	1.49768	1.29196	Hi-Ti group			3.58	6.21	0.78		44.5	3.35	41.58
725	MA-414	3.30858	1.85459	2.37404	Feldspar	7.38		11.17	30.85		2.11			48.49
726	MA-415	1.31229	1.39358	1.58877	I/S Mix		3.3	11.07	28.7	1.46			7.32	48.15
727	MA-416	1.42405	1.42462	1.76328	Feldspar			13.25	31.38	6.49				48.87
728	MA-417	1.91871	1.44359	1.44982	Quartz		0.67	2.46	41.71	0.56		1.02	1.85	51.74
729	MA-418	1.13465	1.4853	2.22905	Chlorite		6.29	11.3	24.37	2.84			8.86	46.34
730	MA-419	1.26095	1.34122	1.75186	Chlorite		6.56	11.37	18.4				19.79	43.89
731	MA-420	1.9259	1.42493	2.3983	Kaolinite			20.66	28.5					50.84
732	PLZ4-001	1.58677	1.71303	3.42585	I/S Mix		3.04	14.3	25.95	5.38			4.17	47.17
733	PLZ4-002	1.62149	1.92496	3.5859	I/S Mix	0.91	3.29	11.32	26.4	2.34			8.83	46.91
734	PLZ4-003	1.28367	1.34454	1.41854	Unknown		1.38	9.17	13.34		11.29	1.53	21.52	40.68		1.1
735	PLZ4-004	1.41605	1.01321	1.5868	Chlorite		8.45	12.11	19.23	0.6			14.86	44.75
736	PLZ4-005	1.94915	1.37291	1.37281	Quartz			0.85	45.53				0.7	52.92
737	PLZ4-006	1.4565	1.21782	3.6885	Quartz			0.34	46.45					53.22
738	PLZ4-007	1.38811	1.01728	1.26536	Quartz		0.54	3.33	41.8	1.22			1.34	51.77
739	PLZ4-008	1.68202	1.39343	1.57408	Chlorite		10.48	12.78	15.63				17.51	43.6
740	PLZ4-009	1.70464	1.22067	1.2859	Quartz			6.33	38.23				4.37	51.07
741	PLZ4-010	1.49227	1.2546	1.267	Chrolite		8.44	9.82	27.3				6.34	48.11
742	PLZ4-011	1.35649	1.24074	9.9932	Quartz			2.89	44.19					52.92
743	PLZ4-012	1.33113	1.28138	13.7592	Quartz				46.74					53.26
744	PLZ4-013	1.66049	1.17637	8.38973	Quartz	0.22	0.25	0.62	45.73	0.22				52.95
745	PLZ4-015	2.11485	2.06902	8.24599	I/S Mix	1.42	2.86	11.42	31.67	3.32				49.3
746	PLZ4-016	1.54257	2.84281	23.9859	I/S Mix	0.78	2.44	12.24	27.26	3.84		0.32	5.82	47.31
747	PLZ4-017	1.25095	1.29686	6.15511	Feldspar	4.06	0.38	10.99	31.77	1.36	0.44		2.04	48.96
748	PLZ4-018	1.74109	1.34729	15.6977	I/S Mix	0.67	2.28	11.68	27.35	3.29		0.6	6.83	47.29
749	PLZ4-019	1.47181	1.60805	11.3096	Quartz	0.12	0.51	4.64	40.68	1.4		0.33	0.67	51.65
750	PLZ4-020	1.96041	1.47136	20.292	Illite	0.64	3.53	10.81	22.89	5.64		0.92	10.88	44.69
751	PLZ4-021	1.49984	1.08678	5.22775	Feldspar	0.51		9.37	31.35	12.08				46.7
752	PLZ4-022	1.63975	1.39039	14.9918	Quartz	1		7.32	38.24	2.03			0.39	51.01
753	PLZ4-023	1.16426	1.35581	19.6706	Smectite	0.22	0.9	8.5	31.88		0.7	0.89	6.49	49.54		0.88
754	PLZ4-024	1.77226	1.19934	7.07777	I/S Mix	5.9	0.76	11.4	30.4	1.34			1.82	48.38
755	PLZ4-025				I/S Mix	0.8	1.84	12.09	26.66	3.29		0.53	7.34	46.95				0.51
756	PLZ4-026	1.6504	1.23432	12.969	Chlorite		8.18	12.26	17.58	0.58			17.46	43.94
757	PLZ4-027	1.00816	1.08435	6.10124	Quartz	2.78	0.34	4.41	39.66	1.13			0.8	50.87
758	PLZ4-028	1.25115	1.03162	3.9472	Quartz		0.35	0.7	45.85					53.09
759	PLZ4-029	1.55242	2.63118	11.6637	Quartz	0.73	0.93	5.29	38.54	1.05	0.26		2.39	50.82
760	PLZ4-030	1.55021	1.21913	23.6937	Muscovite	0.53	0.16	18.87	23.48	8.78		1.06	0.55	46.57
761	PLZ4-032	1.46088	1.36421	7.15094	I/S Mix	1.09	2.43	11.09	28.34	3.36			6.2	47.48
762	PLZ4-033	1.38761	1.1182	6.18439	Quartz				46.74					53.26
763	PLZ4-034	2.22871	1.45743	10.4614	I/S Mix		0.88	9	32.12	2.53			3.51	49.88					2.08
764	PLZ4-035	1.99164	1.2573	7.65269	Feldspar	8.05		9.22	32.6	0.54		0.24	0.67	48.69
765	PLZ4-036	1.44665	1.31556	12.3232	Muscovite			18.92	24.45	9.06			0.71	46.85
766	PLZ4-037	2.23064	1.69522	13.8849	Illite	0.47	1.68	7.75	33.53	3.38			4.29	48.9
767	PLZ4-038	1.90924	1.39219	8.73783	Quartz	0.79		0.9	45.31	0.26				52.75
768	PLZ4-039	1.2399	1.18548	4.3711	Quartz			1.74	43.69	0.4			1.94	52.23
769	PLZ4-040	1.7286	1.23789	5.74153	Quartz		0.3	0.43	46.12					53.14
770	PLZ4-041	1.5047	1.28206	11.4684	I/S Mix		1.38	10.43	21.68	2.46			5.15	49.42	0.75	2.69			6.04
771	PLZ4-042	1.0907	1.11985	3.91247	C/B Mix		14.6	1.66	28.24		8.1		0.63	46.77
772	PLZ4-043	1.80318	1.27905	15.348	I/M Mix	0.72	0.43	18.69	24.18	7.48			1.58	46.92
773	PLZ4-045	2.1344	1.368	3.9967	Feldspar	0.93		9.37	31.42	11.47				46.8
774	PLZ4-046	1.45638	1.14942	5.38043	Quartz				46.74					53.26
775	PLZ4-047	1.00092	1.03984	12.0549	Kaolinite	10.56	0.44	20.93	20.22	0.3	0.96		0.37	46.22
776	PLZ4-048	1.49524	1.60678	8.21579	Quartz		0.49	2.5	42.63	0.85			1.57	51.96
777	PLZ4-049	1.51101	1.59764	6.91327	Quartz		0.33	1.51	44.72	0.42			0.31	52.72
778	PLZ4-050	1.38392	1.27259	20.8768	Quartz	0.22	0.27	3.96	41.47	1.73			0.69	51.67
779	PLZ4-051	1.34159	1.26276	10.7546	Quartz		0.36	2.09	43.32	0.66			1.39	52.18
780	PLZ4-052	1.59431	2.87203	6.59995	I/S Mix	0.75	2.36	11.4	25.21	2.64	0.49		9.89	46.62		0.64
781	PLZ4-053	1.48282	1.48256	13.6686	Quartz			0.61	45.77				0.64	52.97
782	PLZ4-054	1.84261	1.36308	4.4472	I/M Mix		1.53	15.87	25.73	7.13			2.68	47.05
783	PLZ4-055	1.30423	1.78026	11.0771	Quartz			2.92	43.24	1.64				52.2
784	PLZ4-056	1.66519	1.52108	6.4121	I/S Mix	0.64	2.26	11.71	28.09	2.42		1.14	5.85	47.9
785	PLZ4-057	1.44183	1.83417	7.51494	I/S Mix	0.76	2.09	8.7	32.76	2.9			3.85	48.95
786	PLZ4-058	2.08266	1.37379	6.27011	Quartz				46.74					53.26
787	PLZ4-059	1.31903	1.24751	10.704	Feldspar	2.19	0.31	7.69	34.22	7.31				48.28
788	PLZ4-060	1.44364	1.2079	3.11575	I/S Mix	0.15	1.83	12.1	27.98	4.57			5.96	47.4
789	PLZ4-061	1.94393	2.08645	3.36759	Feldspar	8.21		9.12	33.52					49.15
790	PLZ4-062	1.7379	1.43433	17.3005	Feldspar	6.62		11.8	29.84		3.53			48.21
791	PLZ4-063	1.38334	2.01285	12.4587	Feldspar	8.21	0.24	9.83	32.71					49.02
792	PLZ4-066	1.22964	1.07041	6.15872	I/S Mix	0.93	1.87	5.57	36.65	1.25			3.65	50.08
793	PLZ4-067	1.93786	1.40646	7.25107	I/S Mix		2.12	12.44	27.44	3			7.46	47.54
794	PLZ4-068	1.0416	1.75578	14.6228	Biotite		5.88	8.66	18.44	6.81		1.91	16.14	42.18
795	PLZ4-070	1.58013	1.31385	9.07784	C/B Mix	1.04	3.23	7.2	33.43	2.35			3.71	49.05
796	PLZ4-071	1.54293	1.93303	15.0691	Chrolite		8.96	10.71	19.69	1.76			14.45	44.43
797	PLZ4-072	2.05525	1.39309	6.10638	I/S Mix	1.16	4.13	11.16	27.05	3.5			5.89	47.11
798	PLZ4-073	1.39854	1.36439	19.9576	Quartz		0.64	4.12	38.65	1.18			4.92	50.48
799	PLZ4-074	1.315	1.64922	12.1321	Quartz			0.59	45.51				1.07	52.83
800	PLZ4-075	1.14732	1.12397	15.5348	Quartz			0.72	46.11					53.17
801	PLZ4-076	1.12815	1.0774	15.8572	C/B Mix	0.56	3.79	14.25	22.28	2.09	0.54	0.74	9.69	46.05
802	PLZ4-077	2.48068	2.42653	14.6391	Smectite		1.5	7.3	32.62				9.75	48.83
803	PLZ4-078	1.50117	2.31121	15.3957	I/S Mix	1.29	3.13	13.53	25.48	2.29	0.48		6.68	47.11
804	PLZ4-079	1.93944	1.30192	4.17635	Quartz				46.74					53.26
805	PLZ4-080	1.66982	1.36547	12.4583	I/M Mix	1.03	0.45	17.59	25.51	5.43			2.47	47.53
806	PLZ4-081	1.81756	1.90427	7.9665	Quartz			1.05	45.17				0.97	52.81
807	PLZ4-082	1.15042	1.96951	9.98484	Biotite		5.83	9.99	24.06	3.52			11.01	45.59
808	PLZ4-083	1.23454	2.02825	18.2725	Illite	1.04	0.9	11.57	29.43	6.86			2.82	47.39
809	PLZ4-084	1.25423	1.86762	17.3461	I/S Mix	3.37	0.87	10.35	31.52	1.82			3.39	48.69
810	PLZ4-085	1.41587	1.14712	22.0904	Muscovite	0.53	0.39	18.12	23.86	9.11			1.67	46.32
811	PLZ4-086	1.50965	2.26911	12.9566	I/S Mix	4.01	1.23	11.79	28.19	2.72		0.42	4.18	47.45
812	PLZ4-088	1.15115	1.34128	5.21951	Quartz		1.12	3.77	40.41	1.97			1.54	51.19
813	PLZ4-089	1.3309	1.02706	7.93729	Feldspar			16.15	28.55	6.98				48.32
814	PLZ4-090	4.31956	2.44186	4.128	I/M Mix		0.9	9.24	31.93	10.8				47.12
815	PLZ4-091	1.5415	1.27231	11.8152	Muscovite		1.03	16.91	24.84	8.07		0.46	1.91	46.79
816	PLZ4-092	1.63388	1.22431	4.98419	Feldspar	0.93		8.85	31.13	12.8				46.28
817	PLZ4-093	1.33719	2.53038	17.6622	Quartz		0.36	5.88	39.62	0.4		0.92	1.06	51.76
818	PLZ4-094	1.35718	1.31144	4.64373	Quartz		0.22	1.78	44.1	0.59			0.86	52.46
819	PLZ4-095	1.28087	2.12718	5.4905	Quartz		0.34	1.15	44.75	0.45			0.69	52.62
820	PLZ4-096	2.05931	1.89361	21.2961	I/S Mix	0.82	2.09	9.72	27.16	3.47	0.9	1.24	8	46.59
821	PLZ4-097	1.29319	1.26248	12.8176	Feldspar	7.22		9.48	33.35	0.31	0.45			49.18
822	PLZ4-098	3.55028	2.20082	8.86962	I/S Mix		1.55	12.48	26.88	3.41			8.57	47.12
823	PLZ4-099	1.28533	2.15469	11.2041	I/S Mix	0.76	2.62	11.29	27.63	3.94			6.6	47.16
824	PLZ4-100	1.67875	1.53764	15.3437	I/M Mix	0.83		18.8	25.31	6.26			1.17	47.63
825	PLZ4-101	3.06868	1.61265	14.7665	Muscovite		1.03	15.03	24.53	9.77			3.96	45.69
826	PLZ4-102	1.59701	1.09986	8.64995	Quartz				46.74					53.26
827	PLZ4-103	1.69831	1.27184	16.9234	Quartz				46.74					53.26
828	PLZ4-104	1.07364	1.4831	8.1724	Quartz			0.58	46.23					53.19
829	PLZ4-105	1.72313	1.2382	7.64919	Feldspar	4.34		12.65	29.24		5.5			48.27
830	PLZ4-106	1.29036	1.07615	10.5779	Quartz		0.33	1.54	44.35	0.62			0.65	52.52
831	PLZ4-107	1.83554	1.4062	8.29751	Biotite		5.26	8.57	19.91	4.43		0.56	18.35	42.93
832	PLZ4-108	1.39871	1.39243	6.10898	Quartz		0.34	5.08	38.54	1.65		1.02	2.58	50.78
833	PLZ4-109	1.44903	1.1522	8.91725	Quartz			0.98	45.58	0.54				52.91
834	PLZ4-110	1.27856	1.44258	14.5278	Quartz			0.57	45.94	0.54				52.95
835	PLZ4-111	1.483	1.24657	8.20896	Chrolite		4.84	11.98	21.27	2.03			14.96	44.92
836	PLZ4-112	1.49141	2.03476	13.2526	I/S Mix		1.26	10.72	28.63	4.15			7.99	47.26
837	PLZ4-113	2.25056	1.57161	5.92278	Feldspar	4.32		13.12	28.6		5.87			48.1
838	PLZ4-114	1.69843	1.96177	4.65384	Quartz		1.65	4.31	38.74	1.84			2.82	50.64
839	PLZ4-115	1.25513	1.15368	11.496	Smectite	6.82	0.75	9.8	31.22				2.99	48.43
840	PLZ4-116	2.37866	1.32423	5.32853	Quartz			0.72	45.72				0.59	52.98
841	PLZ4-117	1.83041	1.47918	14.3456	Feldspar	5.6		10.93	31.33	0.66	2.85			48.63
842	PLZ4-118	1.41306	1.8763	5.78458	I/S Mix		2.61	8.28	32.63	2.27			5.23	48.97
843	PLZ4-119	1.40886	1.14098	23.0664	I/S Mix		1.48	8.94	29.54	3.23			8.3	47.83		0.68
844	PLZ4-120	1.21626	1.0629	10.5804	Feldspar	7.81		10.63	31.46	0.36	0.58		0.6	48.57
845	PLZ4-121	1.23743	1.28477	7.23747	Chrolite		7.43	9.27	21.69	0.48	0.59		15.1	44.84				0.61
846	PLZ4-122	1.73238	1.24298	12.6065	I/M Mix		2.28	11.96	26.16	8.34			5.32	45.93
847	PLZ4-123	1.86339	1.09354	7.73455	Quartz			1.3	45.34	0.47				52.9
848	PLZ4-124	1.34619	1.60622	10.5183	Smectite	1.1	0.94	7.6	35.7	0.58			3.86	50.21
849	PLZ4-125	1.61373	2.14919	13.2647	I/S Mix	2.24	2.25	10.91	28.6	2.58			5.85	47.58
850	PLZ4-126	1.10947	1.14642	18.354	Quartz				46.74					53.26
851	PLZ4-127	1.56998	2.37577	12.7186	I/S Mix		1.13	10.03	32.09	3.22			4.65	48.88
852	PLZ4-128	1.27764	1.28062	24.0141	Illite		1.06	9.71	28.33	4.44			9.75	46.71
853	PLZ4-129	1.54829	1.29842	15.3421	Quartz			3.25	42.37	0.68			1.68	52.02
854	PLZ4-131	1.33714	1.38809	15.5619	Quartz		0.82	5.19	37.81	1.58		1.14	2.89	50.56
855	PLZ4-132	1.39784	1.30955	6.87804	Feldspar	9.25		9.77	32.29					48.69
856	PLZ4-133	1.79566	2.17537	18.3691	Quartz			10.22	37.71					52.06
857	PLZ4-134	1.94889	1.345	22.2272	Feldspar			12.3	35.88					51.82
858	PLZ4-135	1.39344	1.60888	6.54412	I/S Mix	0.8	3.61	12.4	25.92	3.12			7.2	46.95
859	PLZ4-136	1.52104	1.79735	15.0133	I/S Mix	0.36	1.04	14.39	24.59	5.62	1.09	2.58	3.78	46.55
860	PLZ4-137	1.52033	1.78862	23.5456	I/S Mix	0.72	2	10.69	28.52	3.38	0.5	0.72	5.96	47.51
861	PLZ4-138	1.41485	1.47328	6.04802	Feldspar	8.33		9.97	32.69					49.01
862	PLZ4-139	2.15817	1.73072	7.03753	Illite		3.24	13.86	24.65	5.64			6.25	46.37
863	PLZ4-140	1.36303	1.35718	6.00067	Quartz		0.57	3.49	38.63	1.71			5.43	50.17
864	PLZ4-141	1.33752	2.40942	18.3206	Illite		1.12	10.36	27.52	4.79			9.74	46.47
865	PLZ4-142	1.74249	1.42743	7.28307	Unknown			5.5	19.72		22.8		10.84	41.13
866	PLZ4-143	2.40943	1.3542	6.08283	Quartz			0.4	46.4					53.21
867	PLZ4-144	1.33999	1.19144	10.4744	Unknown		2.36	6.47	35.49	2.6			3.36	49.72
868	PLZ4-145	1.7899	1.78433	11.8884	Feldspar	5.14		12.4	29.58		4.54			48.33
869	PLZ4-146	1.20179	1.56062	10.4124	Muscovite	0.28	1.01	16.12	24.73	8.76			2.8	46.28
870	PLZ4-148	1.23029	1.21817	5.44688	Quartz			0.65	45.78				0.58	52.99
871	PLZ4-149	1.42822	1.33033	14.713	I/S Mix	1.79	1.73	5.96	35.75	1.71		0.49	2.86	49.7
872	PLZ4-150	1.61742	1.29699	9.69846	Illite	3.71	0.57	10.19	30.65	5.94			1.45	47.49
873	PLZ4-151	1.48954	1.52821	6.84917	Quartz			0.45	46.34					53.2
874	PLZ4-152	3.02804	1.39676	12.3692	Quartz			2.17	43.31	1.16			1.29	52.07
875	PLZ4-153	1.19565	1.45323	11.9573	Feldspar	3.63		12.12	29.48	0.49	6.12			48.17
876	PLZ4-154	1.75525	1.2606	15.3807	I/S Mix		1.24	10.43	27.59	3.35			10.62	46.77
877	PLZ4-156	1.31815	1.30543	10.6962	I/S Mix		1.82	8.85	20.13	2.37			5.03	49.51	1.35	3.49			7.46
878	PLZ4-157	1.44316	1.37018	12.965	Quartz			0.77	45.44				0.93	52.86
879	PLZ4-158	1.1	1.4694	6.00491	I/S Mix		2.65	11.31	25.54	3.11			9.29	47.07		1.03
880	PLZ4-159	1.47383	1.26848	4.97407	Quartz				46.74					53.26
881	PLZ4-160	1.39167	1.30062	19.0407	Quartz		0.42	3.15	42.23	1.39			0.94	51.88
882	PLZ4-161	1.00906	1.34788	11.0696	Kaolinite	10.12	0.48	21.14	20.62	0.29	0.83			46.52
883	PLZ4-162	1.3875	1.3356	9.74164	Quartz		0.64	1.75	43.77	0.41			1.05	52.38
884	PLZ4-163	1.21835	1.19132	7.59092	Quartz		0.38	2.94	42.18	1.11			1.58	51.82
885	PLZ4-164	1.28569	1.14601	7.37608	Quartz		0.43	2.36	43.87	0.82				52.53
886	PLZ4-165	1.42531	1.46826	6.80516	I/S Mix	0.31	3.51	13.58	22.91	4.43		0.43	9.13	45.71
887	PLZ4-166	2.06225	1.64134	3.55032	I/S Mix	0.91	2.23	12.06	27.35	2.74		0.67	6.55	47.49
888	PLZ4-167	1.30039	1.27658	4.1779	Quartz				46.74					53.26
889	PLZ4-168	1.23098	1.56485	9.28506	I/S Mix	0.39	1.33	13.76	26.4	4.25			6.78	47.1
890	PLZ4-169	1.42824	1.51138	19.2735	Quartz		0.37	1.97	43.73	0.84			0.76	52.32
891	PLZ4-170	1.85723	1.39484	11.0606	C/B Mix		26.34	4.03	22.77					46.86
892	PLZ4-171	1.58832	1.12914	3.11956	I/S Mix		0.58	3.71	19.19	0.5	2.84		2.19	41.24					7.53				6.05	12.61	3.56
893	PLZ4-172	5.58343	1.6742	8.94241	I/S Mix	1	0.53	7.59	36.39	2.28			1.98	50.23
894	PLZ4-173	2.27951	1.38451	24.6342	I/S Mix	1	1.6	11.94	25.86	3.36		0.84	8.87	46.54
895	PLZ4-174	1.29892	1.23298	11.7831	Quartz		1.19	4.2	39.98	1.63			1.81	51.18
896	PLZ4-175	1.60633	1.45496	14.8282	I/S Mix	4.72	1.29	11.12	30.6	1.63			2.15	48.5
897	PLZ4-177	1.63627	1.41625	9.57323	Quartz		0.37	1.22	44.67	0.38			0.74	52.62
898	PLZ4-178	1.36064	1.23159	17.8613	Quartz		1.14	4.01	36.96				2.71	52.14		3.04
899	PLZ4-179	1.31951	1.63707	16.9215	I/S Mix	0.64	2.61	9.59	28.36	3.77		0.34	7.63	47.06
900	PLZ4-180	1.612	1.00424	16.2748	Illite	0.57	1.37	8.69	33.04	4.49		0.31	2.76	48.78
901	PLZ4-181	1.05635	1.25716	35.2507	Illite		0.75	12.11	26.58	5.18		0.56	8.27	46.54
902	PLZ4-182	1.20039	1.28034	14.3858	Biotite		7.67	9.61	19.68	6.28		0.88	12.6	43.29
903	PLZ4-183	1.21263	1.66494	7.92005	Feldspar			12.34	25.42	3.51			7.09	44.74												6.9
904	PLZ4-184	1.54796	1.38262	10.4377	Muscovite	0.25	0.78	17.32	24.69	7.9		0.3	1.98	46.79
905	PLZ4-185	1.2608	1.02088	3.38559	Quartz		0.3	0.97	44.62	0.21			1.37	52.53
906	PLZ4-186	1.05505	1.05305	4.02697	Biotite		7.51	9.78	22.74	4.16		0.66	10.01	45.14
907	PLZ4-187	1.37403	1.1475	6.49974	Quartz		0.32	1.3	44.7	0.67			0.42	52.6
908	PLZ4-188	1.38191	1.63823	9.35011	Illite	0.47	1.65	8.29	27.46	3.37		0.77	11.82	46.18
909	PLZ4-189	2.04646	1.45966	12.7098	Chrolite		7.39	10.66	18.92	1.12		2.43	15.2	44.28
910	PLZ4-190	1.4216	1.21707	15.8668	Quartz			0.49	46.31					53.2
911	PLZ4-191	1.64801	1.29365	16.3209	Feldspar	0.4		14.62	24.65	12.26			3.04	45.04
912	PLZ4-192	1.38879	1.70673	7.25315	I/S Mix		2.52	12.31	26.82	4.17			7.11	47.07
913	PLZ4-193	1.2236	1.0014	4.04726	I/S Mix		1.62	13.38	25.97	4.31		0.81	6.95	46.96
914	PLZ4-194	1.51287	1.5397	9.29802	I/S Mix	0.6	3	11.19	27.54	3.09		0.6	6.6	47.38
915	PLZ4-195	1.82704	1.19978	8.3969	Muscovite		0.7	17.68	25.1	8.21			1.3	47.02
916	PLZ4-196	1.34998	1.08428	5.37095	Feldspar	8.31		10.78	31.08	0.31	1.12			48.4
917	PLZ4-197	1.73743	2.39276	3.77984	I/S Mix	0.79	3.68	12.38	25.49	3.38		0.51	6.99	46.78
918	PLZ4-198	1.75003	1.50869	9.80105	Feldspar			11.21	26.03	16.03		2.29		44.44
919	PLZ4-199	1.72115	1.64303	2.88799	Unknown		0.44	13.25	21.34	0.96	13.02		6.43	44.55
920	PLZ4-200	1.4786	1.21149	3.66747	Illite		1.96	13.9	27.52	5.64			3.38	47.61
921	PLZ4-201	1.16794	1.00273	8.10428	Quartz			0.8	45.51				0.78	52.9
922	PLZ4-202	1.39522	1.32073	1.96221	I/S Mix	1.93	2.59	13.7	27.15	3.03			3.84	47.76
923	PLZ4-203	1.01066	1.00114	12.1819	Quartz				46.74					53.26
924	PLZ4-204	2.07275	1.46701	7.20426	C/B Mix	0.34	5.26	14.22	17.49	2.85			16.16	43.68
925	PLZ4-205	1.93635	1.22246	6.84065	Muscovite	0.27	0.98	16.16	24.95	9.03			2.24	46.36
926	PLZ4-206	1.21391	1.9485	2.36507	I/M Mix		0.72	17.06	26.59	6.17			1.58	47.88
927	PLZ4-207	1.16726	1.25209	2.58131	I/S Mix	4.41	1.08	9.13	31.09	1.8			4.42	48.06
928	PLZ4-208	1.12637	1.03709	5.68503	Quartz			2.49	43.96	1.04				52.51
929	PLZ4-209	2.05977	2.67756	6.80087	Quartz			8.47	39.27					52.27
930	PLZ4-210	1.51116	1.29577	5.49343	Feldspar	8		10.17	31.64	0.82			0.93	48.44
931	PLZ4-211	1.30268	1.2251	13.5358	Biotite		5.27	10.77	19.74	4.47			16.3	43.45
932	PLZ4-212	1.02784	1.13018	9.80748	Quartz			2.76	39.17				7.69	50.38
933	PLZ4-213	1.54858	1.2237	6.59397	Quartz		0.52	2.55	42.15	0.63			2.37	51.78
934	PLZ4-214	1.34154	1.39634	11.7999	Quartz			7.89	38	3.16				50.96
935	PLZ4-215	1.50989	1.97264	3.75524	I/S Mix	0.87	1.78	10.79	28.12	2.89			8.29	47.26
936	PLZ4-216	1.55202	1.76592	9.27232	I/M Mix		2.13	10.58	24.86	11.47			6.64	44.33
937	PLZ4-217	1.18164	1.31964	5.61016	I/M Mix		1.27	7.36	25.61	10.42			11.64	43.7
938	PLZ4-218	1.15962	1.49826	14.4853	Quartz	0.74	0.29	3.93	41.24	1.45			0.78	51.57
939	PLZ4-219	1.44584	1.09236	5.72802	Biotite	0.24	6.37	9.31	24.93	3.52		0.71	8.93	45.99
940	PLZ4-220	1.79621	1.47931	5.90804	Quartz		0.26	1.2	45.09	0.71				52.75
941	PLZ4-221	2.05873	1.73848	7.24025	Quartz		0.68	4.62	39.38	1.72			2.69	50.92
942	PLZ4-222	1.18755	1.222	8.86159	Feldspar	2.37		8.9	30.45	10.44			1.59	46.25
943	PLZ4-223	1.12177	1.92896	7.86776	Quartz	3.19	0.56	6.62	37.3	0.89			0.97	50.46
944	PLZ4-224	1.58018	1.14706	7.60245	Hi-Fe group		1.06	5.7	8.97	0.83		0.63	46.32	36.48
945	PLZ4-225	1.3973	1.18592	4.18837	Feldspar	3.52		6.45	37.22	1.42			1.2	50.18
946	PLZ4-226	1.32233	1.87902	5.1296	Quartz				46.74					53.26
947	PLZ4-227	1.44434	2.43323	6.31125	I/S Mix	1.08	2.32	11.58	28.2	3.78			5.55	47.49
948	PLZ4-228	2.04374	1.66565	8.72726	I/S Mix		0.7	8.72	35.76	2.16			2.28	50.38
949	PLZ4-229	1.61406	1.84931	3.98934	Quartz		0.84	3.23	41.65	0.84			1.68	51.77
950	PLZ4-230	1.53143	1.7144	6.36378	Feldspar	8.18		9.56	32.33	0.6			0.72	48.61
951	PLZ4-231	1.43122	1.21352	3.08777	I/M Mix	2.35	0.93	16.07	26.59	5.89			0.67	47.51
952	PLZ4-232	1.12266	2.01335	9.61269	Muscovite		0.45	18.44	24.33	8.82			1.21	46.74
953	PLZ4-233	2.27299	2.13585	11.2916	Illite		1.65	7.59	32.75	3.41			6.11	48.48
954	PLZ4-234	1.47253	1.74018	6.23089	Hi-Fe group				2.22				59.15	30.59	1.14	0.77				6.14
955	PLZ4-235	1.33759	1.39073	2.57303	Quartz			0.5	46.3					53.2
956	PLZ4-236	1.23794	1.36609	30.8107	Biotite		9.64	9.53	21.29	3.14		0.78	10.76	44.86
957	PLZ4-237	1.81412	1.24316	4.16026	Illite	3.93	0.5	9.77	31.47	5.2			1.27	47.85
958	PLZ4-238	1.47606	1.15828	17.0411	I/S Mix	0.83	0.58	10.43	32.28	2.83			4.01	49.03
959	PLZ4-239	1.27458	1.54223	13.28	Quartz		0.46	2.87	41.72	0.88			2.45	51.62
960	PLZ4-240	1.40825	1.47763	5.3427	Quartz			1.23	44.78	0.5			0.9	52.6
961	PLZ4-241	1.83136	1.45437	5.32895	Quartz			1.66	43.1	0.58		1.41	1.12	52.12
962	PLZ4-242	1.3339	1.67042	6.78932	Illite		3.23	10.72	24.59	4.74			11.24	45.48
963	PLZ4-243	1.37965	1.04196	3.89355	Quartz	0.81	0.23	4.77	40.34	1.47			1.01	51.37
964	PLZ4-244	1.36373	1.02751	5.55961	I/S Mix		1.17	12.53	26.57	3.97			8.92	46.83
965	PLZ4-245	1.25293	1.11029	6.84971	Quartz		0.23	0.84	45.82					53.11
966	PLZ4-246	1.76233	1.63708	5.82005	Quartz			0.33	46.45					53.22
967	PLZ4-247	2.71014	1.77665	26.8535	Feldspar			12.11	28.28	1.03	9.73		1.24	47.61
968	PLZ4-248	1.6017	1.86501	7.59991	I/S Mix	1.11	2.45	10.45	28.82	2.92		0.44	6.15	47.66
969	PLZ4-249	1.60687	1.52097	13.7132	Quartz		0.33	1.94	43.27			0.76	1.36	52.34
970	PLZ4-250	1.54902	1.20229	8.02432	Feldspar	8.7		10.35	31.66			0.7		48.59
971	PLZ4-251	1.36564	1.15058	8.02819	Kaolinite	1.3		22.52	24.36	0.93	0.88		0.86	49.15
972	PLZ4-252	1.69544	1.25894	4.30823	Illite		1.9	12.01	29.38	4.93			3.76	48.03
973	PLZ4-253	1.70991	1.54477	14.2074	Quartz			0.19	46.58					53.23
974	PLZ4-254	1.45628	1.15997	11.7743	Quartz			2.18	43.67	0.47			1.33	52.36
975	PLZ4-256	1.52471	1.27634	2.98657	Feldspar	0.89		10.22	31.05	10.08			0.64	47.11
976	PLZ4-257	1.43012	1.46959	5.64986	I/S Mix		1.94	13.64	26.91	4.41			5.68	47.41
977	PLZ4-258	1.77095	1.6278	4.61226	Feldspar	3.21		12.48	29.3	2.5	1.59		2.91	48
978	PLZ4-259	1.08739	1.16015	12.8125	Quartz		0.7	5.74	38.43	2.34			2.08	50.72
979	PLZ4-260	2.01273	2.51531	4.43055	Quartz		0.64	3.29	41.84	1.2			1.24	51.79
980	PLZ4-261	2.22794	1.75901	14.0015	Muscovite	0.51		18.95	23.95	8.93			1.07	46.6
981	PLZ4-262	1.40778	1.30507	3.53563	Illite		2.04	15.46	25.96	7.68			1.84	47.03
982	PLZ4-263	1.65258	1.43421	10.6231	Feldspar	6.31		9.71	32.65	0.41			1.95	48.96
983	PLZ4-264	2.14904	1.46676	5.64164	Feldspar			9.37	31.22	12.87				46.54
984	PLZ4-265	1.17295	1.50348	16.6065	I/S Mix	1.14	1.73	10.6	29.21	3.3		0.5	5.8	47.73
985	PLZ4-266	1.09373	1.98622	22.0793	Illite	1.02	2.1	13.11	27.94	7.56			1.05	47.23
986	PLZ4-267	1.17514	1.55142	24.2757	I/S Mix	2.14	2.75	11.06	28.38	2.9			5.22	47.55
987	PLZ4-268	1.40129	1.22838	7.0486	Muscovite			17.01	24.41	13				45.59
988	PLZ4-269	1.51377	1.65635	6.38052	Quartz				46.74					53.26

## Sheet: Oxide ratio
Series	Sample	AR	Circlarity	3-D diameter	Mineral Type	SiO2	Al2O3	Fe2O3	MgO	CaO	Na2O	K2O	TiO2	MnO	ZnO	P2O5	SO3	CO2	PtO2	ZrO2	Y2O3	La2O3	Ce2O3	Nd2O3	PdO	BaO
1	DD-001	1.41853	1.71756	4.13794	Muscovite	51.67	35.77	0.78	0.58		0.5	10.7
2	DD-002	1.59091	1.77259	3.72076	Chlorite	33.59	23.47	28.36	14.05			0.53
3	DD-003	1.277	2.36892	2.95486	Illite	52.19	26.64	8.04	5.31		0.91	6.92
4	DD-004	1.15592	1.97113	8.24496	Feldspar	73.55	18.13		0.16		8.16
5	DD-005	1.4783	1.58466	3.97906	Smectite	67.63	24.23	1.79	4.31	1.76	0.23				0.04
6	DD-006	1.42605	2.48759	2.46738	I/M Mix	61.16	19.29	7.1	2.73		0.69	9.03
7	DD-007	2.36385	2.20442	3.83338	Quartz	92.62	3.8	1.28	1.06		0.27	0.97
8	DD-008	2.86305	1.95254	3.7126	Illite	53.64	26.11	5.77	4.26		0.18	9.46	0.58
9	DD-009	1.62236	2.2093	4.74171	Quartz	98.45	0.97		0.16		0.42
10	DD-010	1.12619	1.31357	4.17272	I/M Mix	54.15	30.04	3.8	2.68		0.79	7.74	0.81
11	DD-011	1.59617	1.4644	5.45008	Quartz	77.3	13.78	3.09	1.54		0.48	3.8
12	DD-012	2.73051	1.77015	2.05974	Chlorite	55.39	5.89	14.43	14.16	9.06	0.48	0.6
13	DD-013	2.06833	1.5281	2.84262	Quartz	98.3	0.95		0.68		0.08
14	DD-014	1.79066	1.38265	4.35531	Illite	54.91	23.55	8.93	3.61			8.19	0.81
15	DD-015	1.77947	1.34311	2.23421	I/S Mix	71.98	17.11	3.14	3.66		0.7	3.41
16	DD-016	1.61416	1.48783	2.25421	Quartz	96.15	2.72		0.48		0.18	0.47
17	DD-017	1.68362	1.458	1.91997	Chlorite	45.69	10.32	38.2	2.57	0.59	1.27	1.37
18	DD-018	1.26506	1.54382	1.96619	Chlorite	61.96	15.36	7.79	5.87	2.41	0.95	2.42	3.24
19	DD-019	2.27913	2.03318	1.6084	I/M Mix	63.62	17.78	2.31	4.37	0.62	4.12	7.18
20	DD-020	1.458	1.50557	1.3985	I/S Mix	58.06	22.01	9.74	4.92		0.12	5.15
21	DD-021	1.66214	1.45076	1.92608	Chlorite	54.54	14.95	13.14	8.8	3.3	2.47	1.38	1.42
22	DD-022	1.18397	1.99881	1.54315	I/S Mix	51.53	18.32	19.79	3.19	1.08	3.79	2.3
23	DD-023	1.3637	1.18707	1.90696	I/S Mix	59.51	25.05	5.17	3.89		0.52	5.86
24	DD-024	1.3297	1.36118	2.35941	Illite	60.09	24.57	4.35	3.1		0.57	7.33
25	DD-025	1.51953	1.46447	1.6363	Chlorite	41.41	16	32.18	7.03	1.08		2.3
26	DD-026	1.09606	1.39936	1.43826	Quartz	92.04	4.03	1.6	1.06		0.66	0.61
27	DD-027	1.66198	1.56493	4.88727	Feldspar	68.27	17.52		0.25		9.83									4.13
28	DD-028	2.33705	2.17655	2.13478	Smectite	68.63	18.32	2.65	2.01		7.64	0.75
29	DD-029	1.86416	1.69713	1.82519	Feldspar	49.95	13.62	6.1				30.32
30	DD-030	1.38364	1.3957	6.06825	Quartz	89.96	3.4	1.06	0.68		0.14	0.77								3.98
31	DD-031	1.23825	2.04349	1.17024	Feldspar	75.41	13.84	1	0.66		8.4	0.69
32	DD-032	1.78299	2.15822	4.53939	Chlorite	53.03	20.1	11.26	7.52	3.4	1.13	3.56
33	DD-033	1.35089	2.3795	2.79417	Quartz	93.59	3.72	0.8	0.78		0.67	0.44
34	DD-034	1.55528	2.57575	3.10378	I/S Mix	60.32	24.18	6.92	4.34	0.81	0.49	2.95
35	DD-035	1.58544	1.99373	3.05028	Quartz	98.29	1.71
36	DD-036	1.75791	1.53412	2.09534	I/M Mix	53.21	28.54	6.78	4.29		0.65	6.53
37	DD-037	1.60741	1.82988	2.55257	Feldspar	65.28	17.75	1.4	0.68		0.34	14.54
38	DD-038	1.85157	2.35829	2.66128	Quartz	89.94	5.19	2.13	1.31		0.48	0.97
39	DD-039	1.11913	1.35588	3.73595	I/M Mix	55.49	31.67	2.42	1.74		1.21	7.48
40	DD-040	1.68953	1.75257	2.21182	Quartz	95.11	2.26	1.1	0.76		0.1	0.66
41	DD-041	2.08843	1.86338	4.55733	Feldspar	44.87	21.64	13.58	0.5	19.4
42	DD-042	1.52827	1.66571	7.43415	Muscovite	53.51	29.82	3.91	2			9.64	1.11
43	DD-043	1.73278	1.89635	6.41985	Quartz	94.59	2.72	0.97	0.74			0.97
44	DD-044	1.36786	1.80257	3.62939	I/M Mix	59.15	24.47	4.08	2.93			9.38
45	DD-045	1.2051	1.35433	2.4273	Carbonate	10.36	3.18		35.86	49.88	0.72
46	DD-046	2.19764	2.24355	2.48155	Quartz	94.98	3.3		0.79			0.92
47	DD-047	1.46286	2.207	1.94973	Illite	57.42	27.01	4.4	2.89			8.29
48	DD-048	1.79137	1.60428	2.52432	Feldspar	66.79	19.09	1.14	0.84	0.41	10.89	0.85
49	DD-049	2.50298	2.06728	2.74593	Illite	56.93	27.23	3.9	4.24			7.71
50	DD-050	6.72167	3.62418	6.83024	Quartz	86.97	6.1	3.14	2.38			1.41
51	DD-051	1.852	1.76913	3.94688	Quartz	94.38	2.32	1.07	1.34	0.45		0.43
52	DD-052	1.75838	1.2606	3.22643	Biotite	43.59	20.35	19.11	9.54			5.97	1.44
53	DD-053	1.3624	1.33965	3.73961	I/M Mix	62.88	20.17	5.36	2.62			8.97
54	DD-054	1.59715	1.15355	2.57407	Feldspar	68.57	18.28	0.44	0.57		12.15
55	DD-056	3.51316	3.25457	13.9755	I/M Mix	41.02	17.25	26.17	5.16			6.98	3.41
56	DD-057	1.81928	1.49647	5.80008	Quartz	95.31	2.16	0.84	0.95		0.21	0.53
57	DD-058	1.40057	1.00501	11.3547	Chlorite	39.68	18.24	34.34	6.8		0.19	0.74
58	DD-059	1.81387	1.70795	13.008	Feldspar	69.69	19.03	0.8	0.19	1.31	8.76	0.22
59	DD-060	1.03916	1.41127	15.756	Feldspar	69.27	18.84		0.09	0.51	11.23	0.05
60	DD-061	1.71153	2.72584	23.6214	C/B Mix	34.13	20.09	25.22	17.87			2.05	0.64
61	DD-062	1.51832	1.49315	9.85857	Biotite	48.61	17.4	19.03	8.76	0.3	0.49	3.95	1.46
62	DD-063	1.37727	1.54807	5.07774	Illite	55.77	26.57	3.09	3.74	0.09	0.46	9.28	0.99
63	DD-064	1.97196	1.21757	4.23965	Quartz	93.54	3.43	1.65	0.57	0.03	0.09	0.59	0.11
64	DD-065	1.82337	2.60462	6.82057	Illite	52.61	22.56	10.91	4.18	1.45	0.7	6.65	0.94
65	DD-066	1.33865	1.86852	6.12376	Feldspar	68.89	18.35	1.42	0.91		10.34	0.1
66	DD-067	1.2259	1.00108	4.66228	I/S Mix	56.17	28.73	3.46	3.41		1.28	6.95
67	DD-068	2.73053	1.82276	6.03119	Feldspar	58.02	26.88	1.41	0.97	3.43	4.37	4.91
68	DD-069	1.59129	1.26336	5.96971	Illite	55.8	25.48	6.32	3.51			8.88
69	DD-070	1.32094	1.32123	6.43699	Feldspar	71.58	19.05	0.42			7.89	1.06
70	DD-071	1.49941	1.91011	6.43433	Quartz	96.51	1.73	0.6	0.82			0.33
71	DD-072	1.86971	1.17177	9.43737	Muscovite	53.25	30.98	2.84	1.74		0.58	9.89	0.72
72	DD-073	1.39205	1.28156	8.31564	Hi-Fe group	27.27	10.71	48.09	1.33	3.09	1.04	0.58				4.51	2.79
73	DD-074	1.59878	2.30344	3.27701	Quartz	86.95	3.61	5.78	2.26	0.59	0.48	0.34
74	DD-075	1.45217	1.3555	16.0922	Muscovite	51.36	30.15	3.89	2.36		0.25	11.22	0.76
75	DD-076	1.32066	1.88938	6.03778	Illite	56.73	16.04	16.97	3.26		0.59	4.77	1.65
76	DD-077	3.54244	2.20516	8.36052	Quartz	98.76	0.69		0.35		0.21
77	DD-078	1.44889	1.33144	5.02117	Quartz	98.18	1.12		0.61		0.08
78	DD-079	1.50805	1.75075	3.7385	Quartz	88.64	5.85	1.21	2.72		0.14	1.44
79	DD-080	1.3217	1.33176	3.29362	Feldspar	70.32	18.07		0.23		11.02	0.37
80	DD-081	2.04136	1.39624	4.27535	Chlorite	36.58	20.53	30.38	11.82			0.69
81	DD-082	1.23077	1.05389	4.06352	I/S Mix	30.21	13.47	2.37	1.48		1.16	2.96						48.35
82	DD-083	1.19908	2.96241	5.3411	C/B Mix	54.35	20.97	7.59	10.52		1.34	5.24
83	DD-084	1.52736	1.86762	4.00702	Chlorite	51.9	20.92	15.41	8.97		0.38	2.42
84	DD-085	1.45993	1.92083	4.82799	Illite	61.87	22.02	5.51	2.96		0.07	6.58	0.98
85	DD-087	1.87221	1.63666	3.6891	Quartz	96.91	1.46	0.89	0.33		0.07	0.34
86	DD-088	1.56674	1.30093	5.48837	Chlorite	50.78	5.71	17.7	12.91	9.7	1.26	0.81	1.14
87	DD-089	1.44043	1.23782	5.32364	Biotite	52.5	18.86	8.6	12.05		1.41	4.89	1.69
88	DD-090	1.12165	1.06205	5.39894	I/S Mix	56.27	22.99	9.02	5.68		0.51	4.71	0.82
89	DD-091	2.95719	1.79742	3.12287	I/M Mix	54.97	31.58	3.38	2.66		0.68	6.73
90	DD-092	1.1144	1.74667	3.61871	Illite	60.85	19.93	7.51	4.37	0.53	0.77	6.04
91	DD-093	1.63834	1.32286	1.44878	Chlorite	39.39	22.29	23.13	14.53			0.66
92	DD-094	1.16618	1.08413	1.32274	Quartz	90.38	4.21	1.79	2.67		0.2	0.76
93	DD-095	1.20535	1.2137	1.48782	I/S Mix	56.48	26.25	6.26	3.68		0.71	6.15	0.46
94	DD-096	1.44495	1.00909	1.14187	I/S Mix	64.81	19.49	2.89	3.3		6.42	3.1
95	DD-097	1.17092	1.51756	2.18293	Quartz	95.84	2.07	0.87	0.86			0.36
96	DD-098	1.03907	1.38913	1.04064	Quartz	91.47	3.88	1.09	2.18		0.51	0.87
97	DD-099	1.52912	1.66234	1.42434	Feldspar	68.31	17.74	0.93	1.05		10.88	0.66	0.42
98	DD-100	1.7093	1.32263	1.14959	Smectite	64.91	19.43	1.56	1.81	1.04	10.41	0.85
99	DD-101	1.38316	1.34723	1.4944	I/S Mix	54.5	26.42	8.44	4.28		1.03	5.33
100	DD-102	1.83792	1.25078	1.05466	Smectite	68.37	16.26	5.24	2.34	1.38	5.19	1.22
101	DD-103	1.6544	1.58933	1.48977	I/S Mix	58.19	21.26	5.95	5.88	1.02	2.61	3.62	0.46				1.01
102	DD-104	1.45954	1.43486	2.33437	Feldspar	68.91	18.8	0.63	0.63		10.7	0.33
103	DD-105	1.73763	1.53225	1.55612	I/M Mix	54.39	31.35	3.17	2.83		0.91	7.36
104	DD-106	1.41049	1.22877	1.12157	I/S Mix	73.41	14.17	3.44	3.82		0.4	3.56	1.19
105	DD-107	1.8703	1.90425	1.5293	Kaolinite	58.48	35.51	1.93	1.69	0.36	0.58	1.45
106	DD-108	1.21789	1.39199	5.15308	I/M Mix	36.81	19.89	29.34	10.06		0.44	3.46
107	DD-109	1.26749	1.27351	4.31995	Illite	56.97	22.2	8.93	5.27		0.51	6.13
108	DD-110	1.07114	1.18758	2.49255	I/S Mix	57.54	23.52	7.64	5.35		0.22	5.72
109	DD-111	1.56422	1.02346	2.53828	Quartz	97.4	1.68		0.86		0.06
110	DD-112	2.20083	1.43018	6.235	I/M Mix	54.25	31.58	3.32	2.01		0.31	8.53
111	DD-114	2.33603	1.69094	5.86003	Quartz	98.91	0.76		0.33
112	DD-115	1.35874	1.25058	5.88293	Illite	57.89	21.68	7.45	5.85		0.33	5.89	0.91
113	DD-116	2.21159	1.56523	7.14144	I/M Mix	54.17	32.93	2.21	0.87		1.45	8.38
114	DD-117	1.1527	1.17432	5.04799	Chlorite	45.61	19.54	21.62	10.55			2.68
115	DD-118	1.17814	1.46078	6.51246	Feldspar	68.54	17.43					14.02
116	DD-119	1.272	1.61249	3.45789	Feldspar	56.87	26.83	0.88	0.43	10.02	4.56	0.41
117	DD-120	4.19369	2.32664	3.88369	Illite	55.71	28.45	5.66	2.49			7.69
118	DD-121	1.29026	1.34242	7.5023	Biotite	45.86	17.83	17.8	11.17			5.93	1.4
119	DD-122	1.15104	1.06958	2.68536	Quartz	96.04	1.68	1.1	0.77			0.41
120	DD-123	2.77695	1.66117	5.0292	Muscovite	55.98	29.77	2.99	1.8			9.46
121	DD-124	1.40459	2.49429	3.36626	I/S Mix	54.8	20.25	10.64	6.85	1.45	0.8	3.95	0.72
122	DD-125	1.14317	1.99001	4.75043	Quartz	92.34	5.79					1.87
123	DD-126	1.1588	1.34389	3.55312	I/S Mix	56.75	26.44	5.67	4.59			6.55
124	DD-127	1.20722	1.15908	4.18727	Feldspar	69.12	19.21			0.66	11.01
125	DD-128	2.81241	2.42573	4.75457	Muscovite	51.11	29.66	2.15	1.75			9.24							6.08
126	DD-129	1.43277	1.27243	2.4527	Quartz	91.97	3.56	1.55	1.1			0.68					1.14
127	DD-130	1.14689	1.41935	3.61317	Chlorite	35.13	21.96	28.6	12.85			0.64		0.82
128	DD-131	1.12001	1.49421	3.17722	Smectite	69.38	17.46	1.31	1.95		9.4	0.49
129	DD-132	1.60933	1.18921	3.77968	I/M Mix	54.88	35.36					9.76
130	DD-133	1.2493	1.59262	3.11958	Illite	56.21	26.91	6.01	3.93			6.93
131	DD-134	1.40031	1.93844	3.01356	Chlorite	36.25	21.76	25.54	16.44
132	DD-135	1.8143	2.12411	5.46633	I/S Mix	57.44	25.14	5.2	5.88			6.35
133	DD-136	2.77596	2.59967	3.50931	I/M Mix	54.53	29.84	4.61	3.01			8.01
134	DD-137	1.76812	1.19197	3.04036	Smectite	65.69	19.64	0.92	1.86	0.7	10.19	1
135	DD-139	1.4156	1.37793	8.17785	Muscovite	54.44	30.76	3.81	1.39			9.6
136	DD-140	1.23608	2.705	3.60443	Illite	63.12	20.43	5.12	2.36		2.84	6.13
137	DD-141	1.73178	1.92736	4.70696	I/M Mix	65.6	18.7	1.41	1.64	1.04	3.59	8.02
138	DD-142	3.56744	1.75331	3.94966	Illite	56.48	27.52	3.73	3.36		1.29	7.61
139	DD-143	1.38563	1.75618	4.12689	Quartz	97.4	1.4	0.68	0.53
140	DD-144	1.46374	1.85336	7.24142	Feldspar	68.65	18.92	1.8	0.79	0.44	8.78	0.63
141	DD-145	1.60147	1.48627	2.44552	Feldspar	65.66	21.01	0.66	0.8		9.97	1.91
142	DD-146	1.50653	1.57364	2.73081	I/S Mix	60.71	23.48	5.17	4.59		0.53	5.52
143	DD-147	1.56638	1.48061	3.09038	I/S Mix	59.57	26.61	3.63	2.06		1.79	6.34
144	DD-148	1.29429	1.4712	4.95917	Illite	59.35	24.08	6.17	2.8		0.54	7.05
145	DD-149	2.05726	1.27577	6.76516	Biotite	43.37	16.99	17.46	16.34		0.18	4.75	0.91
146	DD-150	1.56594	1.32813	3.00325	Quartz	82.1	7.11	3.91	5.02		0.37	1.49
147	DD-151	1.21789	1.32898	3.55669	Biotite	52.92	18.89	11.42	12.35	0.49	0.19	3.74
148	DD-152	1.21707	1.3591	6.07538	Biotite	41.94	17.56	19.18	13.15		0.58	6.06	1.53
149	DD-153	1.28802	1.08586	3.91719	Muscovite	53.16	28.64	5.27	3.09		0.68	8.61	0.56
150	DD-154	1.30223	1.27624	3.64774	Illite	56.35	24.72	6.62	4.66		0.7	6.96
151	DD-155	2.00738	1.8007	6.08804	Chlorite	36.58	17.75	32.14	12.78		0.11	0.63
152	DD-156	1.67525	1.276	3.19943	Chlorite	38.31	22.21	26.25	11.41		0.65	1.18
153	DD-157	2.00811	1.48633	1.93548	Quartz	97.47	1.74		0.79
154	DD-158	1.28686	1.19112	2.62726	Illite	55.2	28.25	2.94	3.08		0.57	9.96
155	DD-159	1.31919	1.45639	1.25793	I/M Mix	55.5	31.94	1.56	1.9		0.58	8.52
156	DD-160	1.47194	1.84315	0.979006	C/B Mix	59.83	18.44	8.08	9.37		0.36	3.93
157	DD-161	1.16236	1.03772	1.18778	Chlorite	37.97	23.55	25.86	11.34		0.55	0.72
158	DD-162	1.26395	1.278	3.92729	Chlorite	31.07	23.97	31.77	13.19
159	DD-163	3.60985	2.57081	3.51827	Carbonate	1.16	0.53			34.72						31.85		27.14
160	DD-164	1.43863	1.70294	2.60438	Illite	56.8	23.91	7.8	2.6	1.02	0.32	7.55
161	DD-165	1.38163	1.58857	2.5179	Chlorite	39.93	21.04	22.19	16.01			0.83
162	DD-166	1.61696	1.80757	4.08186	Feldspar	55.47	29.27	2.77	1.96		0.81	9.72
163	DD-167	1.49347	1.63655	3.25043	I/S Mix	53.93	25.27	6.92	2.87	1.86	2.18	4.55	2.41
164	DD-169	1.61028	1.44538	2.35653	I/S Mix	58.23	25.95	4.24	4.2		1.59	5.79
165	DD-170	1.29822	2.18418	2.02611	C/B Mix	79.37	8.38	3.68	3.92		0.54	1.63	2.49
166	DD-171	2.1252	1.38549	2.44677	Carbonate	19.78	0.43	0.15	0.19			0.07						78.03	1.35
167	DD-172	1.79304	1.82348	3.67446	Illite	58.36	25.81	3.62	4.31			7.9
168	DD-173	1.48622	1.50537	1.64715	Smectite	64.38	20.64	6.53	4.58	1.31	1.55	1.01
169	DD-174	1.13856	1.17378	11.1888	Quartz	92.37	2.94	1.16	0.84			0.53	2.15
170	DD-175	1.32632	1.73794	2.10173	Illite	59.9	22.74	4.76	4.28		0.72	6.44	1.16
171	DD-176	3.16366	1.43713	1.398	I/S Mix	64.05	21.54	5.71	3.55		1.27	3.88
172	DD-177	1.26055	1.44084	5.42159	Chlorite	38.14	22.41	28.3	10.3		0.29	0.56
173	DD-178	1.64981	2.60711	3.14656	Biotite	54.89	15.36	11.91	12.41	1.79		3.64
174	DD-179	1.51173	2.8425	1.4412	C/B Mix	56.48	18.08	7.51	12.69	2.42		2.81
175	DD-180	2.23642	1.40686	1.37856	Quartz	89.97	1.97	4.79	2.62		0.2	0.44
176	DD-181	1.44612	1.22004	2.20888	Hi-Fe group	37.5	8.83	50.67	3
177	DD-182	2.16713	1.66901	3.18889	Chlorite	36.85	20.51	29.9	11.87			0.86
178	DD-183	2.03636	1.36435	1.75844	Biotite	61.04	15.92	9.82	7.12	0.92	0.41	4.76
179	DD-184	2.20202	1.17464	2.15238	I/M Mix	72.85	6.54	15.29	1.89		0.39	3.04
180	DD-185	1.64785	1.44543	2.64848	Feldspar	54.95	27.87	1.23		11.87	3.44	0.65
181	DD-186	1.4758	1.51302	1.53845	C/B Mix	78.72	11.39	2.6	4.44	0.7		2.15
182	DD-187	2.14447	1.26301	2.16616	I/S Mix	52.62	21.99	6.35	7.69	2.77	1.11	3.07					4.39
183	DD-188	1.13606	2.06632	3.01544	Muscovite	49.46	26.38	2.31	2.36		0.26	9.59	9.63
184	DD-189	1.24921	1.11458	7.7621	I/M Mix	55.07	29.56	4.77	1.99		0.59	8.02
185	DD-190	1.38443	1.47517	3.79378	Quartz	90.27	3.92	1.15	3.52			1.13
186	DD-191	1.14451	1.0953	3.70453	Chlorite	48.3	15.16	17.95	16.69	1.08	0.24	0.59
187	DD-192	1.36775	1.29181	3.25577	I/M Mix	62.03	7.05	25.09	1.03			4.8
188	DD-193	1.5829	1.24951	3.25054	Feldspar	55.49	28.77	4.27	1.78		0.51	9.19
189	DD-194	1.34575	1.2554	8.78795	Feldspar	70.5	18.52		0.38		10.61
190	DD-195	1.34819	1.19435	9.77739	Quartz	83.13	9.58	2.76	1.68		2.06	0.8
191	DD-196	1.58023	3.59511	3.37796	Quartz	92.36	3.93	1.57	1.3		0.28	0.56
192	DD-197	1.29874	1.71163	9.51437	Illite	58.24	24.96	5.12	3.29			8.39
193	DD-198	1.48878	1.14652	5.83872	Illite	54.38	26.18	6.28	3.34		1.64	7.44	0.73
194	DD-199	1.72668	1.28049	3.60954	Biotite	57.92	5.26	8.46	26.1		0.56	1.69
195	DD-200	1.46674	1.43987	3.21917	Quartz	93.03	3.51	1.19	1.24		0.46	0.56
196	DD-201	1.85815	1.56452	14.0162	Muscovite	44.64	23.92	6.48	1.46		0.15	9.09						14.27
197	DD-202	1.33364	1.19705	18.4844	I/M Mix	52.08	15.12	11.01	4.7		0.23	16.86
198	DD-203	2.20595	1.06995	9.24466	C/B Mix	51.72	18.61	7.65	20.18		0.67	1.16
199	DD-204	1.54219	2.81653	15.1523	I/S Mix	61.21	20	7.38	5.17	0.8	0.76	4.69
200	DD-205	2.0056	1.14924	4.65956	Chlorite	58.42	11.97	12.01	5.96	8.11		1.9	1.62
201	DD-206	1.26544	1.45994	19.7309	Chlorite	38.06	22.88	19.05	19.89		0.11
202	DD-207	1.6706	2.36203	6.9169	Muscovite	51.91	33.34	1.16	1.06		0.21	11.07	1.24
203	DD-208	2.00493	1.49703	4.34506	Illite	49.63	25.68	3.72	6.37			9.17	5.43
204	DD-209	1.02565	2.0226	1.4091	I/M Mix	46.97	28.99	7.5	8.98		0.35	6.56	0.65
205	DD-210	1.08468	1.58918	3.66883	Feldspar	64.73	21.81			2.37	11.1
206	DD-211	1.21666	1.75727	2.17787	Biotite	45.26	20.69	16.78	10.32		1.09	5.84
207	DD-212	1.38987	1.70766	1.23043	Chlorite	43.22	17.42	22.47	11.29	1.84	0.91	1.81	1.05
208	DD-213	1.57735	1.52591	0.995064	I/S Mix	61.28	19.22	7.95	4.74		4.3	2.53
209	DD-214	1.69379	1.63547	2.53434	Carbonate	5.93	2.61	0.8	12.03	31.65	0.08	0.37						46.53
210	DD-215	1.48789	1.34976	1.35961	I/S Mix	61.01	18.31	2.66	4.78	4.15	6.69	2.4
211	DD-217	1.90458	1.36673	2.01972	Smectite	66.41	19.67	1.5	1.61	1.61	8.39	0.81
212	DD-218	1.87585	1.15276	1.39798	Chlorite	45.64	17.02	17.43	14.36	4.08	1.48
213	DD-219	1.85455	2.83316	1.27645	I/M Mix	53.1	18.68	13.68	4.83			9.7
214	DD-220	1.42553	1.49781	2.30495	Quartz	96.31	1.68	0.77	0.88			0.37
215	DD-221	1.58403	1.43466	1.85437	I/S Mix	79.49	5.76	7.68	1.98		0.3	1.18	3.61
216	DD-222	2.09064	1.76664	0.83366	I/S Mix	53.87	25.09	7.75	7.29		1.43	4.57
217	DD-223	5.53167	2.91007	2.50821	Chlorite	55.11	7.73	9.82	17.55	8.69	1.1
218	DD-224	1.88365	1.70374	1.16792	Illite	59.03	24.18	6.4	4.09			6.3
219	DD-225	2.09666	1.46957	1.32415	Biotite	48.07	21.33	13.8	11.61			5.19
220	DD-226	1.19571	1.22148	3.52406	Illite	54.75	28.67	4.81	3.35		0.19	8.24
221	DD-227	1.47043	2.03442	1.79351	Illite	56.76	27.72	4.33	3.63			7.54
222	DD-229	1.77879	1.70298	2.87828	Feldspar	64.36	22.27			4.97	8.4
223	DD-230	1.75771	2.20498	1.26562	I/S Mix	49.76	24.46	12.02	7.1		0.97	5.68
224	DD-231	1.44527	1.33107	1.35014	Illite	56.69	26.01	5.54	3.09			8.67
225	DD-232	1.49773	1.02192	0.909846	Smectite	56.37	19.64	9.01	5.72	1.42	6.99	0.85
226	DD-233	1.47593	2.61621	1.75658	C/B Mix	52.5	20.71	4.3	19.95		0.41	2.12
227	DD-234	2.35521	1.74115	1.40567	I/S Mix	55.63	23.37	8.1	7.17		1.47	4.27
228	DD-235	1.29161	1.18062	0.973695	Feldspar	62.83	22.96	1		4.13	8.57	0.5
229	DD-236	1.72836	1.56155	1.5593	I/S Mix	56.85	28.99	3.6	2.71		1.62	6.24
230	DD-237	2.08471	1.60391	1.1213	I/S Mix	56.27	27.56	4.72	4.07		1.22	6.17
231	DD-238	1.45862	1.4222	0.898917	Smectite	65.23	18.58	1.68	1.58	0.75	11.08	1.1
232	DD-239	1.38227	1.50232	1.54299	Feldspar	67.81	18.05	0.59	0.43		12.79	0.33
233	DD-240	2.31318	1.60645	2.54382	Illite	57.91	26.26	5.27	3.29			7.27
234	DD-241	1.7133	1.61641	1.22504	Illite	57.32	22.49	7.54	5.87		0.35	6.43
235	DD-242	1.44604	1.15313	1.05586	Kaolinite	59.06	39.86		0.36			0.72
236	DD-243	1.18612	1.53884	3.21778	Kaolinite	58.39	39.54	0.86	0.26			0.94
237	DD-244	1.81639	1.64844	2.51862	Illite	55.74	25.67	3.65	5.39	1.86		7.7
238	DD-245	2.07142	1.7861	1.5225	Illite	55.92	27.48	4.25	3.3			9.05
239	DD-246	1.79254	1.30798	2.25017	Illite	55.81	29.1	3.58	2.77			8.74
240	DD-247	1.90835	1.59899	1.43946	I/M Mix	54.6	30.15	4.38	2.3			8.56
241	DD-248	1.14965	1.3872	3.35536	Feldspar	61.13	24.55		0.45	7.75	5.66	0.46
242	DD-249	1.87601	1.63851	2.47396	Quartz	84.18	8.5	3.15	1.82		0.36	1.99
243	DD-250	1.60204	1.60452	10.4194	I/M Mix	54.46	30.88	2.23	2.48		1.39	8.57
244	DD-252	1.2211	1.28898	1.59453	Quartz	85.59	6.48	2.97	3.92			1.05
245	DD-254	1.73193	1.41057	3.83104	Quartz	98.74	0.83		0.43
246	DD-255	1.60569	1.19663	1.6977	Quartz	94.18	3.53	0.9	0.74			0.65
247	DD-256	1.20659	2.57057	3.32788	Illite	54.01	27.12	6.03	2.18		0.61	9.04	1.01
248	DD-258	1.89724	1.52358	3.41808	C/B Mix	38.5	26.69	24.02	7.57		0.55	2.67
249	DD-259	1.56504	2.50233	1.75909	Feldspar	67.63	17.14	0.87	0.72		0.44	13.21
250	DD-260	1.94799	1.48788	2.90333	Chlorite	58.07	14.53	15.26	9.51		1.41	0.44		0.79
251	DD-261	1.86435	1.88707	1.2405	Chlorite	49.42	19.47	16.58	9.26	1.76	1.5	2.02
252	DD-262	1.01415	1.1049	1.37657	Quartz	89.84	3.91	3.09	2.27		0.38	0.52
253	DD-263	2.5665	1.63421	3.69538	Chlorite	49.99	19.26	20.35	8.1			2.3
254	DD-264	1.98908	1.9834	3.36486	I/S Mix	55.86	19.62	13.5	5.43	1.15	0.67	3.77
255	DD-265	2.12398	1.37277	2.32213	Biotite	50.28	16.14	16.8	12.09		1.34	3.35
256	DD-266	1.29394	1.1753	1.27704	Biotite	33.78	10.83	7.99	23.77	21.52		2.1
257	DD-267	2.08235	1.61529	2.58063	Quartz	91.46	4.41	1.53	1.15		0.31	1.14
258	DD-268	2.85216	1.90034	2.71093	C/B Mix	41.29	23.65	23.56	9.05		0.5	1.95
259	DD-269	1.84522	1.73776	2.40217	C/B Mix	65.03	18.06	7.31	7.66	0.83	0.51	0.61
260	DD-270	1.40738	1.364	1.72026	I/S Mix	44.16	22.83	7.88	4.67	1.58	2.54	1.86					1.41			11.68
261	DD-271	1.42024	1.441	1.51159	I/S Mix	55.05	26.35	7.68	4.39		0.56	5.98
262	DD-272	1.61894	1.97251	4.82393	C/B Mix	58.8	18.46	5.82	10.76	0.97	1.58	3	0.61
263	DD-273	1.52916	1.32554	6.78151	Feldspar	63.77	21.54	1.91	1.03	3.44	7.5	0.81
264	DD-274	1.19428	1.24973	4.31186	Quartz	97.3	1.07	0.77	0.87
265	DD-275	1.14562	1.52878	3.3976	Quartz	91.25	5.26		0.51		2.98
266	DD-276	1.41409	1.28416	3.75268	Hi-Ti group	16.56	6.44	29.2	2.77			0.28	43.59	1.16
267	DD-277	1.60759	1.20867	5.25409	I/S Mix	63.42	17.06	5.68	4.65	3.17	2.18	2.89	0.95
268	DD-279	1.81436	1.97189	2.33272	Quartz	96.23	1.94	0.72	0.56			0.54
269	DD-280	5.55923	2.38618	3.02891	Chlorite	56.35	4.1	12.53	15.72	9.87		0.62		0.82
270	DD-281	1.36343	1.16331	2.69498	I/S Mix	53.72	25.43	7.67	8.27			4.9
271	DD-283	1.70817	1.1872	4.80784	Hi-Fe group	13.87	4.64	74.43	2.47	0.75			1.52				1.63
272	DD-284	1.34577	1.45278	1.78078	I/S Mix	68.84	16.43	4.99	2	0.48	5.74	1.53
273	DD-285	4.27209	1.84282	5.30576	Chlorite	59.21	2.94	9.45	16.66	10.53	0.91	0.3
274	DD-286	1.8796	1.52831	15.8096	Muscovite	52.54	32.34	2.71	1.35		0.5	10.56
275	DD-287	1.46809	1.77368	9.15018	Feldspar	44.96	26.73	7.8	0.69	19.48		0.35
276	DD-290	1.13674	1.34301	8.64932	Illite	54.61	21.84	10.42	2.57		0.56	6.92	1.85				1.23
277	DD-291	2.11059	1.39121	15.1262	I/M Mix	54.82	24.84	6.19	2.93			11.22
278	DD-292	1.16872	1.45653	18.0769	Biotite	39.13	14.9	26.81	9.2	5.13		3.78	1.04
279	DD-293	1.14151	1.04465	8.6843	Biotite	44.46	19.84	22.77	6.98	0.77		5.18
280	DD-294	1.44993	1.86907	8.11956	Feldspar	68.24	19.19	1.47	1.19	0.75	8.41	0.75
281	DD-295	2.78504	1.55537	5.14348	Chlorite	44.18	19.52	18.84	11.87	2.48	1.13	1.98
282	DD-296	1.70417	1.56124	6.56848	I/M Mix	42.23	27.95	15.87	7.55			6.39
283	DD-297	1.80922	1.53957	4.66789	Feldspar	55.24	27.88		0.4	12.75	3.37	0.37
284	DD-298	1.9087	1.23958	2.14743	Quartz	86.98	6.62	2.66	2.05		0.15	1.53
285	DD-299	2.17131	2.82196	2.31423	Feldspar	66.57	17.61	1.17	0.6	2.21	11.39	0.45
286	DD-300	1.58494	1.30458	2.71437	Illite	57.62	25.26	5.3	3.49		0.15	8.18
287	DD-301	1.41524	1.34694	8.53461	I/M Mix	53.18	32.73	2.18	2.17	0.94	0.97	7.82
288	DD-302	1.78306	1.4874	5.47172	Quartz	87.69	5.29	1.9	1.87	0.4		0.84		2.01
289	DD-303	1.40844	1.10007	4.23675	I/S Mix	61.83	20.62	6.4	4		0.7	5.18		1.28
290	DD-304	2.54595	1.33587	3.8161	I/S Mix	69.22	17.35	4.27	2.12		2.48	3.48		1.07
291	DD-305	1.05823	1.31558	15.7751	Unknown	76.8	9.71	7.43	2.5		0.54	3.01
292	DD-306	1.92392	1.20497	4.14712	Quartz	94.49	2.34	2.29	0.59		0.29
293	DD-307	2.57314	1.38311	8.23937	C/B Mix	49.63	22.9	7.65	14.16		0.35	5.31
294	DD-308	2.21505	1.28035	4.51754	Illite	55.21	28.88	4.38	2.92		0.47	8.14
295	DD-309	2.11642	1.34463	4.18597	Chlorite	50.38	17.48	14.27	13.66			3.33	0.88
296	DD-310	1.85156	1.3257	4.0518	Hi-Ti group	35.82	3.28	2.88	1.19		0.56	0.73	55.54
297	DD-311	1.20436	1.00087	1.89655	Illite	55.28	27.32	3.7	3.38		0.36	9.34	0.62
298	DD-312	1.15314	1.50547	3.5903	Quartz	92.77	3.32	1.86	1.18			0.87
299	DD-313	2.15977	1.47276	1.55866	Illite	55.96	28.58	3.38	2.61			8.17	1.3
300	DD-314	2.1215	1.33892	2.2995	Chlorite	41.28	21.4	25.5	9.74	0.56	0.14	1.4
301	DD-315	1.15384	1.19137	4.86282	Chlorite	24.24	13.34	14.71	7.82	0.19	0.36	0.77						38.58
302	DD-316	1.15381	1.32551	3.50612	Hi-Fe group	17.23	8.39	48.3	1.59	0.57	0.62	1.15	0.3					21.84
303	DD-317	1.55278	1.3573	3.94303	Quartz	93.88	2.6	1.79	0.95			0.79
304	DD-318	1.20923	1.02191	1.12781	Quartz	87.71	4.53	2.12	4.76			0.87
305	DD-319	1.29045	1.25012	8.62052	Muscovite	52.69	30.22	4.6	2			10.49
306	DD-320	2.05641	1.30221	1.5245	Illite	56.93	26.27	4.36	4.48			7.96
307	DD-321	1.15384	1.19137	4.86282	Chlorite	41.23	21.63	22.88	12.14	0.3	0.56	1.26
308	DD-322	1.00967	1.60297	6.74947	I/M Mix	54.27	27.25	5.14	2.57			10.77
309	DD-323	1.25013	1.69456	1.85449	Feldspar	67.09	17.86	1.84	0.3		3.38	9.53
310	DD-324	1.66431	1.4112	1.33428	Hi-Fe group	33.21	12.59	46.72	5.24			1.58	0.66
311	DD-325	1.58544	1.38396	1.55241	Chlorite	79.57	7.51	7.32	4.81			0.78
312	DD-326	1.46657	1.74953	2.55499	Biotite	41.64	16.57	25.61	6.49			6.87	2.82
313	MA-001	1.31348	1.27704	6.95988	Feldspar	59.41	24.87	1.15	1.06	8.13	4.81	0.58
314	MA-002	1.62681	1.57154	2.87973	Feldspar	66.23	20.21	0.85	0.46	1.78	10.17	0.29
315	MA-003	1.36839	1.96156	3.80938	Feldspar	71.31	18.44				9.42	0.83
316	MA-004	1.80599	1.8692	3.06747	I/S Mix	56.37	21.37	15.86	1.64		1.11	3.65
317	MA-005	1.6692	1.69298	2.01473	Muscovite	54.66	29.4	3.61	1.31			11.02
318	MA-006	1.30827	2.41712	2.78497	I/S Mix	61.49	24.13	2.79	7.91	1.95		1.72
319	MA-007	1.39402	1.92872	3.5025	Quartz	95.79	2.07	1.58				0.56
320	MA-008	1.06839	1.37267	6.22745	Chlorite	33.82	22.04	27.95	15.83			0.36
321	MA-009	1.34875	1.75885	5.00997	Quartz	100
322	MA-010	1.39269	1.64845	4.02928	Quartz	92.27	3.87	1.24	1.22	0.46		0.93
323	MA-011	1.06338	2.08039	4.19344	Feldspar	66.61	20.08	0.59	0.88	1.63	9.17	1.04
324	MA-012	1.06881	1.87662	4.59577	Quartz	88.91	6.48	0.6	0.44		3.07	0.5
325	MA-013	1.26679	1.74779	5.60428	Quartz	85.86	7.36	0.94	0.34		4.09	0.9	0.52
326	MA-014	1.29428	1.45057	3.21443	Carbonate	1.24			45.89	52.87
327	MA-015	1.63169	1.61971	2.9154	Chlorite	57.36	19.51	9.49	8.08	0.83		3.25	0.47				1.01
328	MA-016	1.96379	2.02509	1.51191	C/B Mix	41.33	23.91	20.17	11.63		1.12	1.83
329	MA-017	1.54456	2.30857	1.62772	C/B Mix	60.61	32.18	2.24	1.96	0.71		2.3
330	MA-018	1.64554	1.61112	1.4511	Quartz	94.35	2.52	1.34	1.37			0.41
331	MA-019	1.65307	1.37344	1.21191	I/S Mix	58.51	23.59	8.28	4.94			4.68
332	MA-020	1.83025	3.0526	0.822151	Illite	56.55	27.99	3.69	4.32			7.44
333	MA-021	1.58663	2.22928	0.917874	I/S Mix	48.35	21.35	10.54	6.1	1.4		4.63							7.63
334	MA-022	1.65401	1.68648	4.00116	I/S Mix	57.76	25.44	5.32	5	1	1.01	4.47
335	MA-023	1.71689	2.0866	5.58597	Muscovite	52.92	34.45	1.28	0.71		0.65	9.99
336	MA-024	1.35099	2.12916	5.90786	I/M Mix	55.88	25.44	4.72	4.01			9.96
337	MA-025	1.47137	1.43554	2.11386	Quartz	90.17	5.45	2.76	0.79			0.82
338	MA-026	1.42239	1.6698	5.46341	Feldspar	71.5	18.76				9.74
339	MA-027	2.12238	1.83905	2.53998	C/B Mix	42.16	24.9	19.36	11.68			1.9
340	MA-028	1.58348	1.48568	2.594	Feldspar	62.64	21.93	1.22	0.7	3.15	9.73	0.63
341	MA-029	1.45791	1.51272	2.63297	Chlorite	51.15	22.04	13.17	9.77	0.39	0.57	2.92
342	MA-030	1.01087	1.51181	1.76484	Smectite	64.79	19.56	3.37	2.92	0.8	7.45	1.11
343	MA-031	1.2369	1.70014	1.95783	Chlorite	47.7	20.95	15.72	13.18		0.96	1.49
344	MA-032	1.44449	1.8632	3.37225	Quartz	98.17	0.72	0.56	0.54
345	MA-033	1.51111	1.49713	2.45635	I/S Mix	56.2	27.45	3.74	4.42		0.96	6.44	0.78
346	MA-034	1.2955	1.47956	2.79316	Chlorite	35.26	23.89	25.79	14.3			0.77
347	MA-035	1.42892	1.5754	2.5954	Hi-Fe group	44.08	5.5	45.24	3.59	0.61		0.38	0.61
348	MA-036	2.3869	1.67757	2.92716	Chlorite	53.98	11.69	8.16	24.34	0.97		0.86
349	MA-037	1.14452	1.46502	5.0819	Biotite	45.02	19.59	13.91	14.74			5.52	1.22
350	MA-038	1.23134	1.44102	4.07854	I/M Mix	51.74	34.58	1.8	0.8		1.17	9.13	0.79
351	MA-039	2.31037	1.86178	4.32881	Chlorite	49.57	17.03	15.13	17.22			1.06
352	MA-040	1.88989	1.53909	2.00509	Feldspar	62.28	23.57	0.55		5.46	8.15
353	MA-041	1.69217	1.87682	4.13319	Quartz	94.1	2.87	1.62	0.94			0.48
354	MA-042	1.46944	2.11073	1.97149	Chlorite	37.74	24.1	21.62	15.51			0.53		0.5
355	MA-043	1.50238	2.16876	1.60072	Quartz	84.56	7.47	4.64	1.64	0.43		1.27
356	MA-044	1.56013	1.60026	2.37192	Chlorite	58.51	15.59	9.17	7.67	5.05		2.05					1.96
357	MA-045	1.34693	1.84418	3.40576	Illite	34.29	14.45	4.86	4.97			4.44	0.74			18.66					17.59
358	MA-046	1.03119	1.10908	2.37414	Quartz	85.73	6.55	3.45	1.18		1.91	1.18
359	MA-047	1.34496	1.56913	2.7118	Quartz	94.61	2.84	1.31	0.86			0.38
360	MA-048	1.17372	1.37073	4.3667	Illite	53.01	26.57	6.33	4.48			8.9	0.71
361	MA-049	2.10888	1.66341	2.85665	Chlorite	47.2	20.04	16.55	8.56	0.72		2.39	3.54				0.99
362	MA-050	1.20784	1.78914	2.72702	Quartz	94.03	2.92	0.99	1.06			0.57	0.43
363	MA-051	1.56345	1.73214	2.0228	Quartz	92.39	2.99	2.73	1.43			0.47
364	MA-052	1.65038	1.54796	3.07385	I/S Mix	59.94	20.29	8.21	6.32	1.2		3.25	0.79
365	MA-053	1.4849	1.77241	1.96842	Quartz	93.13	3.23	2.24	0.91			0.5
366	MA-054	1.37031	1.77923	2.56505	Carbonate	7.72	2.71	8.24	38.52	42.8
367	MA-055	1.71513	1.91499	2.11006	Kaolinite	58.99	38.16	1.04	0.77			1.04
368	MA-056	1.34113	2.97117	3.71326	Feldspar	68.09	18.35	0.35			13.21
369	MA-057	1.58376	1.51668	3.87287	Quartz	98.6	0.94				0.46
370	MA-058	1.2647	1.3076	2.16607	Illite	56.81	27.22	3.28	4.62			8.07
371	MA-059	1.07405	2.10102	1.32572	Feldspar	67.73	17.82	1.03	0.78	0.3	11.38	0.95
372	MA-060	1.60777	2.44631	1.44282	Quartz	86.69	8	2.64	1.67			1
373	MA-061	1.40863	1.65859	2.19503	Quartz	94.95	3.45		0.57			0.63	0.39
374	MA-062	1.97273	2.16493	2.52414	Quartz	91.54	4.33	1.75	1.52			0.86
375	MA-063	2.10569	1.63576	2.63731	Feldspar	66.71	19.07	0.56	1.26	0.77	11.41	0.23
376	MA-064	1.87213	2.53482	3.03919	Chlorite	54.75	10.66	10.84	22.5	0.48		0.78
377	MA-065	1.48012	2.0191	2.24672	Feldspar	67.85	19.11	1.3	1.09		10.11	0.54
378	MA-066	1.46095	1.77517	4.47162	Feldspar	62.68	23.91			5.33	8.08
379	MA-067	1.32231	1.34577	1.41733	Quartz	90.37	4.95	2.42	1.49			0.77
380	MA-068	1.25632	1.82036	1.6684	Smectite	63.18	19.7	2.63	3.26	0.84	9.38	1
381	MA-069	1.40786	1.21273	1.51315	Quartz	87.5	7.09	2.05	2.26			1.09
382	MA-070	1.6821	1.63363	3.07084	Feldspar	65.92	19.09	1.74	0.75	0.56	11.13	0.81
383	MA-071	1.45603	2.31479	2.10951	I/S Mix	45.16	21.82	23.42	4.16	0.39	3.36	1.69
384	MA-072	1.08411	1.8649	1.92556	I/S Mix	67.35	14.49	7.15	2.89	5.07	1.29	1.24	0.52
385	MA-073	1.31749	1.49914	2.98979	Feldspar	60.36	25.4			7.59	6.16	0.49
386	MA-074	1.21926	1.33071	1.83884	Quartz	90.88	4.71	1.54	2.02			0.86
387	MA-075	1.21057	1.70112	2.65204	Chlorite	60.3	14.82	11.21	8.22	1.3		2.69	0.45				1.02
388	MA-076	1.64357	2.31852	3.51735	Quartz	100
389	MA-077	1.14181	2.08992	5.06827	Feldspar	68.06	17.24					14.7
390	MA-078	1.60187	2.16141	1.74543	Quartz	94.68	2.56	1.4	0.95			0.4
391	MA-079	1.61255	2.47707	2.42176	Chlorite	35.97	24.31	16.37	22.64			0.71
392	MA-080	2.23876	1.71405	3.53438	Feldspar	54.77	28.99	3.02	1.77			9.93	1.52
393	MA-081	1.11103	2.09503	1.86315	Feldspar	67.64	19.58	1.17		0.44	10.42	0.76
394	MA-082	1.06734	1.77327	1.77293	I/S Mix	58.11	25.9	6.25	4.56	0.74		4.45
395	MA-083	1.48162	1.50181	1.81403	Hi-Ti group	13.74	6.81	1.59	1.03				76.83
396	MA-084	1.25922	1.60833	2.44059	C/B Mix	36.68	22.12	28.28	10.51			2.42
397	MA-085	1.20378	1.2454	1.75616	Quartz	85.74	7.24	2.72	1.48	0.49	0.84	0.95	0.55
398	MA-086	1.20093	1.4666	1.88072	I/S Mix	55.57	22.32	11.19	6.59	0.77		3.57
399	MA-087	1.17305	1.72794	5.32484	Feldspar	68.76	18.31				12.93
400	MA-088	1.47444	1.2396	2.9823	Smectite	62.64	22.81	1.79	3.55	0.9	7.76	0.54
401	MA-089	1.70129	1.57051	4.90882	Quartz	82.14	3.31	11.75	1.44			1.36
402	MA-090	1.26432	1.46252	3.00745	I/S Mix	50.8	21.95	13.76	6.88	0.88		4.59	1.13
403	MA-091	2.40459	1.95305	1.3603	I/M Mix	49.72	30.47	7.24	6.27		0.87	5.43
404	MA-092	1.6517	1.61153	2.79235	Chlorite	61.31	16.91	8.77	9.37	0.86		2.78
405	MA-093	1.64167	1.50201	2.89301	I/S Mix	58.56	27.35	4.76	3.32			6.01
406	MA-094	1.47406	1.79512	1.79442	Chlorite	43.5	25.94	18.31	10.36	0.58		1.31
407	MA-095	1.20136	1.6692	2.3562	Feldspar	65.53	17.51	0.72	0.83		0.8	13.92														0.7
408	MA-096	1.13946	1.67878	2.0147	I/S Mix	76.73	12.32	4.5	1.3	2.22	1.99	0.94
409	MA-097	1.23898	1.76042	3.05534	Quartz	88.55	6.89	2.02	1.01	0.49		1.03
410	MA-098	1.59745	1.90739	1.74523	Quartz	89.79	5.02	2.46	1.92			0.82
411	MA-099	1.29337	1.73455	2.67179	Feldspar	67.05	20.64	0.47		2.21	9.63
412	MA-100	1.24389	1.51927	2.28576	Feldspar	64.78	21.7	1.21	0.72	3.11	7.94	0.55
413	MA-101	1.20519	1.6732	1.82576	Feldspar	67.27	18.17	1.97	0.9	0.31	10.85	0.54
414	MA-102	1.39759	1.45647	5.50812	Quartz	93.99	2.94	1.52	0.96			0.59
415	MA-103	1.57088	2.1786	2.44746	Quartz	96.58	1.7	0.66	0.72			0.34
416	MA-104	1.57933	1.81555	2.44952	Feldspar	62.81	21.41	3.95	0.98	1.13	8.27	0.67	0.77
417	MA-105	1.42883	1.30543	3.84459	Quartz	85.07	8.38	2.75	1.2			1.96	0.63
418	MA-106	1.27391	1.786	3.52899	Chlorite	33.34	11.38	43.15	7.09	0.74		1.18	1.5	0.49			1.14
419	MA-107	1.18181	1.34208	3.36876	Quartz	95.5	3.43	0.75				0.33
420	MA-108	1.32498	1.31674	4.397	Chlorite	35.84	15.05	33.65	14.37	0.53		0.55
421	MA-109	1.72727	1.93558	9.76385	Biotite	42.06	19.69	16.95	13.49			6.04	1.77
422	MA-110	1.47371	1.67295	3.27679	I/S Mix	53.96	25.31	8.46	5.02			5.69	0.63				0.93
423	MA-111	1.1467	1.76334	1.98657	Quartz	96.74	1.33	0.84	0.67			0.43
424	MA-112	1.1457	1.60868	7.51612	I/M Mix	59.69	21.16	6.87	2.77			9.52
425	MA-113	1.60629	1.44822	2.34116	I/S Mix	44.4	19.11	4.04	5.08	19.39		2.64					5.34
426	MA-114	1.78338	1.42873	5.04279	I/M Mix	53.95	34.14	1.86	1.05			9
427	MA-115	1.01132	1.30094	2.78163	Feldspar	62.87	24.01	0.6	0.63	11.34		0.55
428	MA-116	1.30622	2.02462	3.02364	Biotite	43.33	18.31	18.56	14.16			4.16	1.48
429	MA-117	1.38142	1.89369	4.01138	I/M Mix	49.21	25.41	4.02	2.13	4.28	1.04	13.91
430	MA-118	1.14999	1.58992	3.42083	Feldspar	68.2	18.49	0.85	0.54	1.02	10.41	0.48
431	MA-119	1.08616	1.65587	2.31232	Chlorite	42.23	20.78	14.74	18.09	0.57		1.48	1.02				1.08
432	MA-120	1.35816	1.41661	5.44131	I/S Mix	55.57	23.61	7.09	8.18			5.55
433	MA-121	2.30212	1.63902	2.12638	Chlorite	49.3	11.1	22.51	7.83	8.66		0.6
434	MA-122	1.80792	1.84545	2.59475	Quartz	93.86	3.32	1.26	1.12			0.44
435	MA-123	2.45615	1.84811	7.10137	Chlorite	37.39	22.1	25.11	14.22		0.8	0.38
436	MA-124	1.7636	2.28386	2.81782	Feldspar	61.22	25.91	2.79	1.54	7.36		1.18
437	MA-125	1.58666	1.38529	1.5904	Chlorite	55.44	19.84	9.27	11.62	0.91		2.17	0.74
438	MA-126	1.38789	1.92814	4.08937	Chlorite	39.27	22.33	15.86	21.77			0.76
439	MA-127	1.84185	1.76533	1.6025	Quartz	96.26	2.08	0.85	0.8
440	MA-128	2.68881	2.06818	6.72398	Illite	57.55	25.47	3.45	4.16			9.38
441	MA-129	1.63721	1.74834	2.77743	Quartz	94.92	2.19	1.85	0.67			0.38
442	MA-130	1.20517	1.46377	2.41564	I/S Mix	55.86	29.37	4.01	4.17			6.6
443	MA-131	1.35568	1.72795	3.4874	I/M Mix	59.97	31.98		2.21			5.83
444	MA-132	2.27012	1.89654	3.60873	Chlorite	41.59	22.75	15.48	18.91			1.27
445	MA-133	1.95472	2.06329	5.04499	Quartz	98.49	0.83		0.4			0.29
446	MA-134	1.6392	1.64373	2.29738	Quartz	96.95	1.67	0.82	0.56
447	MA-135	1.96209	1.36589	3.68155	Feldspar	66.92	18.2				0.81	13.56	0.51
448	MA-136	1.53039	1.65919	2.19432	Feldspar	57.82	27.29	9.55	1.49	1.14	1.65	1.05
449	MA-137	2.30359	1.94356	8.1791	Chlorite	44.7	11.63	21.37	7.33	10.57	1.36	1.64	0.96	0.45
450	MA-138	1.6959	1.82766	4.44629	Chlorite	35.72	24.55	21.22	17.04	0.98		0.5
451	MA-139	1.15863	1.71828	3.34747	Hi-Fe group	2.85	1.31	81.58					14.25
452	MA-140	1.30138	3.26095	3.79392	Unknown	7.93	3.35	2.14	38.64	47.94
453	MA-141	1.19611	1.65086	4.74351	Feldspar	63.22	22.62			5.93	7.89	0.33
454	MA-142	1.44228	1.468	3.02688	Feldspar	71.3	18.85	0.73	0.47	7.53	0.82	0.31
455	MA-143	1.11697	1.75	2.59362	Unknown	42.15	23.68	12.2		21.97
456	MA-144	1.1796	1.8615	4.73678	Illite	55.97	28.53	4.5	2.93			8.07
457	MA-145	1.55773	1.90866	1.78876	Feldspar	67.58	17.57	1.18	0.98			12.68
458	MA-146	1.18007	1.63037	1.64327	Quartz	95.2	2.88	0.94	0.58			0.41
459	MA-147	1.3543	1.9002	1.82879	I/S Mix	47.12	23.94	17.91	5.62	0.56	0.89	3.95
460	MA-148	1.30931	1.52949	2.21577	Feldspar	67.1	19.81			1.48	11.62
461	MA-149	1.47949	2.18407	1.47313	Quartz	93	3.89	1.35	1.31			0.46
462	MA-150	1.31794	1.4481	1.87282	Feldspar	67.57	19.25	0.78		0.78	11.61
463	MA-151	1.39505	1.61805	1.83812	Quartz	95.64	2.07	1.16	1.14
464	MA-152	1.22089	1.9504	1.73914	Quartz	96.72	2.22		0.63			0.44
465	MA-153	1.26961	2.5241	2.51599	I/S Mix	64.99	18.82	3.31	1.8	0.9	8.9	1.28
466	MA-154	1.11478	1.17376	1.90669	Feldspar	68.38	17.57	0.68	0.43		12.6	0.34
467	MA-155	1.41605	1.2508	5.27705	I/M Mix	52.23	34.49	1.6	1.88	0.91	2.45	6.43
468	MA-156	1.41233	1.3336	1.69969	Quartz	92.12	5.39	1.02	0.85			0.62
469	MA-157	1.14154	1.38629	1.65069	Quartz	95.13	3.28	0.95	0.63
470	MA-158	1.27438	1.65075	1.86566	Smectite	63.5	18.81	3.35	4.74	0.37	8.79	0.43
471	MA-159	1.19516	1.12578	4.58205	Unknown	8.54	6.41	0.91	0.6	39.93		1.06	3.39			35.38
472	MA-160	1.41333	1.65198	3.95384	Quartz	95.51	2.86	0.79	0.45			0.39
473	MA-161	1.21194	1.85676	2.66379	C/B Mix	34.63	11.01	3.71	22.67	25.96	0.86	1.18
474	MA-162	2.04626	1.67476	1.32221	Quartz	94.21	3.2	2.6
475	MA-163	1.02594	1.54004	1.59841	I/S Mix	59.6	24.13	5.76	4.59			5.92
476	MA-164				Chlorite	50.45	22.84	14.19	10.72			1.81
477	MA-165	1.2959	2.11944	2.32905	Quartz	92.57	4.23	1.42	0.78			1
478	MA-166	1.95337	1.55021	5.95457	Quartz	100
479	MA-167	1.3231	2.24246	1.49654	Quartz	88.53	4.57	4.47	1.45			0.98
480	MA-168	1.31494	1.7831	2.32357	Feldspar	68.64	17.76	0.97	0.74	0.46	10.97	0.45
481	MA-169	1.62458	1.61744	3.01791	Quartz	97.34	1.36	0.7	0.59
482	MA-170	2.66137	1.79815	4.9857	Muscovite	53.76	29.65	4.59	1.45			10.54
483	MA-171	1.59606	1.50741	1.65646	Feldspar	67.83	17.81	0.88	0.76		0.97	11.76
484	MA-172	1.49698	1.59898	1.18272	Feldspar	67.53	18.86	1.19			12.04	0.38
485	MA-173	1.14391	1.64012	2.09123	I/S Mix	61.51	18.48	9.92	5.21	1.91		1.95	1.01
486	MA-174	1.28851	1.42359	2.01318	Feldspar	64.04	21.65	0.64	0.88	1.72	9.69	1.38
487	MA-175	1.68429	1.64272	1.88632	Quartz	87.06	5.66	3.72	2.55			1
488	MA-176	1.21462	1.43373	2.47638	I/S Mix	58	21.4	8.64	5.21	0.82		5.11	0.83
489	MA-177	1.2411	1.75113	1.21265	Feldspar	66.14	18.6	1.28	0.67		12.95	0.37
490	MA-178	1.06076	1.3636	2.63512	Chlorite	52.71	19.99	15.9	9.39			2.01
491	MA-179	3.18491	1.91232	2.8174	Chlorite	36.59	21.37	28.11	13.92
492	MA-180	1.28565	1.71491	3.24464	Chlorite	54.08	18.34	13.26	10.88			3.44
493	MA-181	1.40489	1.91274	1.72383	Feldspar	63.99	21.74			3.38	10.46	0.43
494	MA-182	1.54531	1.98909	1.87839	Quartz	93.24	3.24	1.96	0.9			0.66
495	MA-183	1.27236	1.67607	1.93365	Chlorite	40.48	22.55	17	18.83			1.14
496	MA-184	1.71586	1.74857	1.84223	Chlorite	57.8	3.49	12.28	16.59	9.53		0.32
497	MA-185	1.76309	1.97532	2.37467	Quartz	93.73	3.49	1.01	1.07			0.71
498	MA-186	1.72339	1.52876	2.68405	Quartz	84.18	10.17	1.39	2.05			2.2
499	MA-187	2.17538	1.72477	4.76429	Smectite	60.45	26.98	4.04	2.06	0.86	2.72	1.58	1.32
500	MA-188	1.01767	1.33715	2.41203	Unknown	75.98	7.76	11.96	0.69				3.61
501	MA-189	1.18112	1.53178	1.31087	Feldspar	65.39	19.13	1.72	1.12	0.53	11.1	1.02
502	MA-190	1.38626	1.59575	2.10208	Quartz	94.79	1.87	2.31	1.03
503	MA-191	1.30525	1.47753	2.64427	Quartz	92.32	3.84	1.13	1.24			0.92	0.55
504	MA-192	1.00311	1.53924	1.33738	Feldspar	67.2	18.31	0.93	0.92		11.74	0.91
505	MA-193	1.64436	1.74889	1.18717	Quartz	91.47	4.15	2.04	1.66			0.69
506	MA-194	1.32928	1.64674	2.56553	Carbonate	10.37	3.82	10.59	34.5	40.72
507	MA-195	1.52018	1.80267	2.02163	Quartz	93.06	3.14	2.27	1			0.52
508	MA-196	2.71053	1.47186	2.82072	I/S Mix	58.64	20.94	8.77	6.42	1.4		3.08	0.76
509	MA-197	1.36473	1.68026	2.61149	I/S Mix	58.88	22.85	11.23	2.55	1.13		1.98	1.38
510	MA-198	1.87452	2.14216	2.18729	Kaolinite	59.12	38.85	0.91				1.12
511	MA-199	1.24956	2.40008	3.65025	Feldspar	69.32	18.13				12.54
512	MA-200	1.52594	2.15486	3.9403	Quartz	98.93	1.07
513	MA-201	1.30308	1.34233	2.17778	C/B Mix	57.93	19.2	7.33	10.45	0.68		2.83	0.88	0.7
514	MA-202	1.52038	1.26386	3.376	C/B Mix	61.39	17.84	5.64	6.65		4.25	4.23
515	MA-203	1.21951	1.46876	3.26873	Quartz	98.51	1.02		0.47
516	MA-204	1.43028	1.8131	1.85507	Hi-Ti group	34.4	12.56	3.25	2.86		0.69	2.61	43.62
517	MA-205	2.18135	1.81183	3.81664	Chlorite	32.71	23.72	31.7	11.48			0.4
518	MA-206	1.2011	1.36024	2.27494	Quartz	95.21	2.89	0.71	0.84			0.35
519	MA-207	1.28984	1.39122	2.58902	Muscovite	53.19	30.98	2.78	1.96			10.42	0.67
520	MA-208	1.29883	1.54321	3.92282	Hi-Fe group	9.21	4	79.96	1.1	0.68		0.36		4.7
521	MA-209	1.0912	1.62691	1.96564	Quartz	89.27	6.16	2.11	0.78			0.69	1
522	MA-210	1.4818	1.30506	1.62442	I/S Mix	50.1	13.06	30.86	1.99	0.66	1.14	2.2
523	MA-211	1.13407	1.39424	2.05729	Quartz	98.54	0.85	0.62
524	MA-212	1.13696	1.39478	1.65836	C/B Mix	56.6	20.62	8.74	10.98	0.71		1.93	0.43
525	MA-213	1.88261	1.41298	1.71996	Unknown	38.71	22.54	23.72	8.32	5.92		0.79
526	MA-214	1.19498	1.86759	1.88868	I/S Mix	57.6	23.2	8.87	6.36	0.88		3.08
527	MA-215	1.18659	1.49762	4.90045	Quartz	100
528	MA-216	1.29679	1.69898	1.81694	Chlorite	48.21	32.52	10.58	5.57		2.59		0.52
529	MA-217	1.35276	1.33047	2.27933	Quartz	92.55	4.83	0.87	0.82			0.94
530	MA-218	1.27094	1.47611	5.61558	Chlorite	36.27	23.03	26.23	14.11			0.35
531	MA-219	1.22198	1.34902	2.10892	Feldspar	67.85	18.25	1.17	0.88		11.85
532	MA-220	1.38081	1.23943	2.81243	Hi-Ti group	11.54	7.02	5.25	2.24	0.4		0.27	73.27
533	MA-221	1.1186	1.92509	4.52899	Chlorite	34.69	23.97	27.67	11.95	0.53		0.62	0.57
534	MA-222	1.44394	1.3964	5.57733	Illite	63.83	24.33	2.86	1.88			7.1
535	MA-223	1.70117	1.8857	2.54387	Illite	57.38	25.57	5.18	4.49			7.38
536	MA-224	1.86175	1.50564	5.51993	Illite	55.73	27.16	4.56	3.54			9.02
537	MA-225	1.2697	1.23819	1.66534	Feldspar	65.22	19.34	1.35	1.35	1.1	8.02	3.62
538	MA-226	1.49197	1.20281	6.52077	Chlorite	35.26	21.38	20.79	22.1					0.47
539	MA-227	1.06459	1.48909	2.15947	I/M Mix	53.94	31.4	2.57	1.74			8.53	1.83
540	MA-228	1.1383	1.13941	1.82239	Chlorite	59.86	11.73	5.6	20.27	1.29		1.24
541	MA-229	1.23607	1.72907	3.56131	Biotite	56.83	16.01	10.74	9.76		0.6	4.99	1.06
542	MA-230	1.42598	1.37081	4.95377	Muscovite	53.82	33.5	0.85	1.25		0.87	9.71
543	MA-231	1.86565	2.21111	3.51047	Quartz	91.07	4.35	1.78	1.53		0.64	0.61
544	MA-232	1.62931	1.55533	1.8079	Quartz	86.5	5.71	4.45	2.76			0.57
545	MA-233	1.53754	1.88499	4.4509	Quartz	90.3	5.35	1.29	1.17		0.97	0.92
546	MA-234	1.22334	1.46811	2.07936	Feldspar	66.56	19.22	1.48	0.61			12.13
547	MA-235	1.10708	1.54803	2.21945	Quartz	92.78	3.81	1.21	1.12			0.47	0.62
548	MA-236	1.1916	1.29219	2.63711	Quartz	83.41	10.13	1.5	1.84			2.54	0.59
549	MA-237	1.32463	1.26332	3.8375	I/S Mix	55.33	28.33	6.41	2.58			5.91	0.55				0.9
550	MA-238	1.74035	1.63244	3.05704	Illite	55.36	26.32	4.94	3.6			9.77
551	MA-239	1.54063	1.43707	3.47833	Illite	55.01	27.92	5.88	3.54			7.65
552	MA-240	1.49742	2.1957	3.28771	Quartz	89.13	7.91	0.89	0.96			1.1
553	MA-241	1.17744	1.43741	2.11774	Feldspar	62.48	23.11	1.06	0.95	4.15	7.55	0.7
554	MA-242	1.04172	1.37114	3.42023	Smectite	61.77	19.59	5.64	2.79		9.38	0.83
555	MA-243	1.66537	1.6581	2.24272	Quartz	95.85	2.29	0.86	0.57			0.43
556	MA-244	2.36139	2.59755	3.05038	I/M Mix	54.89	32.66	1.7	1.03		1.19	7.64	0.88
557	MA-245	1.48146	1.71401	4.00961	Muscovite	54.71	29.01	3.81	1.76			10.71
558	MA-246	1.15791	1.43667	2.10156	Chlorite	58.48	32.46	5.69	1.44	0.96		0.97
559	MA-247	1.27458	1.21933	2.36616	Quartz	94.91	2.86	1.02	0.9			0.31
560	MA-248	1.10327	1.95623	1.75133	Quartz	95.09	2.72	0.83	0.92			0.44
561	MA-249	1.69477	1.64341	3.39802	Chlorite	39.06	25.34	21.67	12.33			1.14		0.46
562	MA-250	1.52826	1.61734	3.00035	Quartz	94.63	3.25	0.99	0.71			0.42
563	MA-251	1.26138	1.42509	2.60216	Illite	58.76	22.01	7.22	5.27			6.74
564	MA-252	1.14897	1.34135	3.72538	Quartz	97.02	1.78		0.41		0.49	0.3
565	MA-253	1.44093	1.38412	3.793	C/B Mix	51.81	24.59	9.92	9.27	0.93		3.48
566	MA-254				Feldspar	70.72	17.04	2.67	1.17		7.08	1.33
567	MA-255	1.17384	1.39841	1.64498	C/B Mix	60.7	18.53	8.17	9.12	1.05		2.42
568	MA-256	1.77791	2.2986	4.35676	Muscovite	53.09	30.59	2.8	2.37			9.61	1.53
569	MA-257	1.13789	1.429	2.15658	Feldspar	62.79	23.27			4.18	9.26	0.5
570	MA-258	1.22579	1.54369	2.77702	Feldspar	61.5	24.86	0.63				13.01
571	MA-259	1.1163	1.39845	2.60205	Quartz	97.5	0.91	0.51	0.75			0.32
572	MA-260	1.33228	1.47354	2.0473	Quartz	93.34	3.93	1.14	0.85			0.73
573	MA-261	1.23378	1.55438	1.75649	Smectite	59.64	28.18	8.28	2.02			1.28	0.6
574	MA-262	1.88831	1.66425	2.30746	Feldspar	66.8	19.31	1.25	0.77	1.5	6.26	4.12
575	MA-263	1.1304	1.58787	0.976931	C/B Mix	55.68	13.94	5.59	21.4	0.78		1.25	1.36
576	MA-264	1.15245	1.23894	2.48355	Quartz	96.65	1.83	0.54	0.6			0.39
577	MA-265	2.2242	1.50477	3.41702	Biotite	49.19	19.5	10.43	13.27			6.74	0.85
578	MA-266	1.3891	1.3757	2.09139	Feldspar	68.26	18.28	0.9	0.78		11.23	0.54
579	MA-268	1.5856	1.74952	8.18718	Quartz	100
580	MA-269	1.18089	1.69521	2.00013	Quartz	93.6	3.18	1.28	1.14			0.81
581	MA-270	1.53136	1.56848	1.34648	Chlorite	45.05	23.72	17.37	11.29			2.57
582	MA-271	1.60123	1.545	3.14458	Chlorite	59.28	18.86	13.5	8.36
583	MA-272	2.15526	1.50061	5.31839	Illite	58.54	21.52	7.48	5.29			7.17
584	MA-273	1.65291	1.36968	8.39587	Biotite	43.48	18.69	18.4	9.8			6.87	2.77
585	MA-274	1.51005	1.88861	4.55251	Unknown	44.3	25.15	8.97	1.71	19.24		0.62
586	MA-275	2.85334	1.94752	2.2465	Chlorite	32.86	16.05	32.97	7.23	9.3		1.59
587	MA-276	1.61452	1.33728	3.27558	I/M Mix	55.39	30.05	3.42	2.72		0.72	7.7
588	MA-277	1.22407	1.1794	3.87413	Chlorite	43.14	22.4	21.26	10.87			2.32
589	MA-278	1.4943	1.4715	10.9484	Biotite	42.08	17.57	17.45	12.57			8.28	2.04
590	MA-279	1.79235	1.55248	3.79017	Chlorite	40.75	18.02	28.7	10.7			1.83
591	MA-280	1.00189	1.54729	4.95058	Muscovite	53.12	31.74	2.92	2.01			9.68	0.53
592	MA-281	1.14554	1.28387	5.03686	Quartz	97.71	1.31	0.98
593	MA-282	1.00622	1.66298	2.43437	Quartz	95.93	1.66	1.09	0.69			0.62
594	MA-283	1.25757	1.62238	1.11881	Quartz	90.8	4.52	1.66	1.65			0.82	0.55
595	MA-284	1.15347	1.34173	1.82062	C/B Mix	52.9	17.39	7.7	16.71			3.85	1.45
596	MA-285	1.85786	1.52039	2.65797	Quartz	84.35	11.14	1.78	1.02			1.71
597	MA-286	1.47763	1.65886	2.76289	Feldspar	68.42	19.16	1.19		0.46	10.23	0.53
598	MA-287	1.0999	1.34295	1.2095	Biotite	50.94	21.37	13.91	8.25			4.21	1.32
599	MA-288	1.27675	1.78935	1.31029	Quartz	98.63	1.37
600	MA-289	1.10044	1.30055	1.83018	I/S Mix	56.85	28.26	4.54	4.01			6.35
601	MA-290	1.73443	2.40689	2.21435	Muscovite	53.38	28.47	5.2	4.46			8.5
602	MA-291	1.19266	1.43859	1.0841	Quartz	86.74	6.24	3.4	1.55			1.3	0.77
603	MA-292	1.25566	1.79509	2.21491	I/S Mix	56.39	21.09	8.69	6.09	0.95	0.73	3.65	0.87				1.54
604	MA-293	3.45189	2.18318	1.76627	Feldspar	55.85	29.14	2.99	1.54		2.21	6.98	1.29
605	MA-294	1.67278	1.86952	1.40414	Chlorite	33.57	25.56	23.41	17.46
606	MA-295	1.24718	1.20514	2.5378	Chlorite	30.53	20.68	38.84	9.95
607	MA-296	1.04639	1.56307	2.78725	Muscovite	55.5	31.27	1.96	2.12			9.15
608	MA-297	1.43345	2.06628	2.31232	Feldspar	68.01	17.54				1.57	12.87
609	MA-298	1.09577	1.2405	1.58467	Quartz	92.54	3.45	1.72	1.11			1.19
610	MA-299	1.44116	1.21638	0.979759	Quartz	94.85	3.07	1.08				1
611	MA-300	1.71161	1.48465	2.44693	Hi-Fe group	16.45	10.12	71.02				0.79					1.62
612	MA-301	1.53092	1.77409	2.86747	Quartz	93.2	3.95	2.27				0.59
613	MA-302	1.40167	1.94285	2.5361	Biotite	43.68	14.47	28.43	7.49			5.93
614	MA-303	1.22138	1.71051	1.47626	Feldspar	58.76	28.66	2.39	1.96			8.23
615	MA-304	1.38792	1.5848	1.36121	Illite	55.25	26.31	6.48	4.15			7.81
616	MA-305	1.30134	1.40206	1.70272	Chlorite	41.02	21.88	23.05	11.82			1	1.22
617	MA-306	1.14187	1.48958	1.60376	Muscovite	55.3	30.93	2.39	1.99			9.39
618	MA-307	1.25816	1.91791	1.70383	C/B Mix	56.71	23.8	3.03	9.22			7.23
619	MA-308	1.02478	1.27568	1.0899	I/S Mix	51.76	26.4	13.93	3.28			4.63
620	MA-309	1.35292	1.87473	1.1482	Illite	55.99	28.36	3.83	2.3			9.52
621	MA-310	1.43254	1.62858	1.36943	Illite	51.99	21.48	14	5.64			6.89
622	MA-311	1.8286	2.20889	1.44788	Feldspar	59.46	24.49	1.55	1.01	6.95	6.54
623	MA-312	1.0459	1.40658	1.95269	Illite	60.39	24.9	4.16	3.52			7.03
624	MA-313	1.63389	1.39504	1.40937	Feldspar	60.42	30.82					8.76
625	MA-314	1.10866	1.22457	1.17368	Illite	58.35	27.41	2.23	2.59		1.66	7.75
626	MA-315	2.05045	1.64606	1.90662	Chlorite	47.13	21.6	11.05	16.79	0.71		0.88					1.83
627	MA-316	1.21946	1.31372	1.56128	I/S Mix	57.78	24.89	6.98	4.57			5.78
628	MA-317	1.29024	1.36503	1.21849	I/S Mix	47.47	24.33	15.59	7.21			4.58	0.81
629	MA-318	1.3517	1.36741	1.57557	I/S Mix	58.18	26.33	7.19	2.78	1.15		4.37
630	MA-319	1.43349	1.43332	1.0243	Chlorite	52.15	10.11	13.98	12.64	8.8	1.39	0.95
631	MA-320	1.75432	1.26681	3.20102	Quartz	99.24	0.48					0.28
632	MA-321	2.12582	1.66856	1.97103	I/S Mix	66.02	16.31	10.99	2.53	2.33		1.82
633	MA-322	1.75349	1.49207	1.2659	Quartz	96.86	2.2		0.94
634	MA-323	2.00854	1.68973	2.39792	Illite	65.75	19.22	4.29	1.92		2.36	6.46
635	MA-324	1.32831	1.54588	3.8921	Feldspar	68.59	17.32	0.49	0.44			13.15
636	MA-325	1.48604	1.2817	3.26151	Quartz	96.01	1.86	0.87	0.82			0.44
637	MA-326	1.56522	1.94747	1.4936	Illite	56.75	27.65	3.9	3.05			8.64
638	MA-327	1.56501	1.12951	1.30439	Smectite	62.22	20.09	10.2	5.33	2.16
639	MA-328	1.29814	1.37331	2.85504	Quartz	99.23	0.77
640	MA-329	1.99254	1.61672	1.17348	Feldspar	56.08	21.43	5.67	1.12	9.82	5.34	0.56
641	MA-330	1.41683	1.41214	1.76951	Hi-Ti group	22.71	10.26	3.34	2.21			2.53	58.94
642	MA-331	1.32256	1.31375	3.29488	Biotite	51.65	17.8	15.76	9.02			3.88	1.9
643	MA-332	1.63325	2.02604	5.81081	Biotite	42.42	19.02	22.36	10.88			5.32
644	MA-333	1.25079	1.67636	2.51534	I/S Mix	48.8	22.51	14.65	7.7	0.82		4.66	0.86
645	MA-334	1.1615	1.69819	4.83631	Quartz	94.07	3.26	0.78		0.42	0.97	0.51
646	MA-335	1.17743	1.82108	1.40545	Feldspar	62.34	24.13			7.17	6.36
647	MA-336	1.42389	1.58309	2.95078	I/S Mix	57.52	30.24	2.54	2.69		1.21	5.8
648	MA-337	1.32574	1.73542	2.29331	Quartz	97.5	1.58	0.59				0.33
649	MA-338	2.46496	2.28408	4.20127	Smectite	60.43	21.58	9.67	5.11	3.2
650	MA-339	2.67839	1.6806	5.01337	Chlorite	45.38	34.98	8.83	7.14		2.72		0.95
651	MA-340	1.47077	1.84634	2.47573	Quartz	95.79	2.41	0.88	0.62			0.3
652	MA-341	1.09718	1.52119	2.31411	Quartz	98.47	1.01		0.51
653	MA-342	1.41089	1.36587	2.21172	I/M Mix	56.47	32.35	2.9				8.28
654	MA-343	1.51967	2.51587	1.94748	C/B Mix	51.35	28.72	15.27	1.97			2.7
655	MA-344	3.32908	1.89239	2.4291	Chlorite	39.06	21.38	20.92	17.91			0.72
656	MA-345	1.27798	1.33523	1.76946	Chlorite	34.51	22.08	26.27	17.13
657	MA-346	1.17669	1.73775	1.67472	Chlorite	48.37	24.71	15.17	8.84			2.92
658	MA-347	1.16746	1.91199	3.96996	Chlorite	35.51	24.44	25.1	13.81			1.14
659	MA-348	2.57722	1.46148	1.6786	Feldspar	67.61	17.84	1.02	0.97		11.74	0.83
660	MA-349	1.7039	1.5876	3.00284	Chlorite	34.27	24.1	29.9	10.79	0.42		0.52
661	MA-350	1.21843	1.7831	1.44275	Quartz	94.48	2.41	1.76	0.84			0.52
662	MA-351	1.32445	1.4799	4.14408	Muscovite	56.17	30.49	2.29	1.53			9.51
663	MA-352	1.3112	1.45953	2.8254	Muscovite	55.42	32.9	1.46				10.22
664	MA-353	1.77449	1.73303	2.61046	Illite	57.93	26.92	3.46	3.43			8.26
665	MA-354	1.14235	1.53507	1.62792	Illite	55.76	26.81	4.72	5.63			7.07
666	MA-355	1.51474	1.4835	1.90066	Biotite	60.1	17.97	9.24	8.54			4.14
667	MA-356	1.35973	1.29031	1.38124	Chlorite	47.09	22.34	13.85	13.86			2.85
668	MA-357	1.29448	1.2858	1.83526	Feldspar	64	21.99	0.6		3.76	9.65
669	MA-358	1.28637	1.31946	1.45608	Feldspar	65.77	20.7			2.44	10.75	0.34
670	MA-359	1.10118	1.22017	5.01555	Feldspar	70.59	18.28				10.33		0.79
671	MA-360	1.22284	1.46863	1.38724	I/S Mix	54.34	22.31	11.11	7.16			4.11	0.97
672	MA-361	1.96979	1.58706	4.55048	Biotite	41.41	18.34	18.01	12.23			8.68	1.32
673	MA-362	1.40297	1.50464	3.96883	Illite	59.05	25.61	4.57	2.74			8.02
674	MA-363	1.61527	1.37236	1.9085	Chlorite	50.8	17.07	10.97	19.24			1.91
675	MA-364	1.82537	1.62026	2.42306	Kaolinite	60.31	37.24	2.45
676	MA-365	1.26593	1.61031	1.96774	I/S Mix	56.03	27.91	10.05	3.52			2.5
677	MA-366	1.15107	1.19268	1.46333	Feldspar	68.39	17.43	1.51	0.63			12.03
678	MA-367	1.36379	1.84643	2.35392	Quartz	94.01	3.46	0.76	0.93			0.84
679	MA-368	1.22503	1.61881	1.27376	Chlorite	78.51	8.39	6.33	5.01			1.11	0.64
680	MA-369	1.58783	1.57188	1.65372	Quartz	96.58	2.57		0.85
681	MA-370	1.27874	1.33387	2.00241	I/S Mix	53.99	21.09	13.3	4.51	1.06		3.38	0.83				1.85
682	MA-371	1.81718	1.40676	0.985176	Carbonate	53.19	3.04	4.73	39.03
683	MA-372	1.971	1.605	1.95466	Illite	56.53	24.33	7.15	3.46			8.53
684	MA-373	1.71926	1.37366	1.28166	Feldspar	67.44	19.15			1.26	10.97		1.18
685	MA-374	1.14867	1.56591	1.47313	Feldspar	69.56	16.81				1.58	12.05
686	MA-375	1.21138	1.4246	1.60595	Biotite	53.04	20.86	10.23	10.12		1.35	4.4
687	MA-376	1.9655	1.3514	1.84845	Quartz	94.66	3.33	1.28				0.73
688	MA-377	1.03244	1.23523	1.66304	Quartz	96.16	1.72	1.24	0.88
689	MA-378	1.68165	1.44267	1.6272	Smectite	67.95	16.69	2.43	2.03		10.36	0.54
690	MA-379	1.298	1.39542	2.87624	Feldspar	55.03	29	6.68				9.29
691	MA-380	5.30527	2.49989	4.06686	Quartz	98.61	1.39
692	MA-381	1.54282	1.53651	2.12704	Quartz	90.22	5.89	1.68	0.88			1.34
693	MA-382	1.73584	1.64292	2.57169	Chlorite	38.12	19.3	25.77	16.81
694	MA-383	1.40429	1.61017	1.26338	I/S Mix	53.16	24.53	9.13	7.57			5.6
695	MA-384	1.60767	1.50261	3.69602	Muscovite	52.95	30.26	4.54	3.43			8.81
696	MA-385	1.46207	1.3423	1.93783	Illite	61.58	25.68	3.1	2.19			7.46
697	MA-386	1.25387	1.63172	1.79548	Feldspar	64.12	22.1			4.67	9.1
698	MA-387	1.14431	2.09232	1.55161	Quartz	90.21	5.04	2.33	1.63			0.78
699	MA-388	1.87514	1.59587	4.03312	Chlorite	36.49	23.1	25.85	14.57
700	MA-389	1.11393	1.44445	1.92475	Smectite	66.94	26.88	2.84	2.37			0.97
701	MA-390	1.61438	1.53507	1.27419	Chlorite	50.77	14.14	12.33	13.6	7.16	2
702	MA-391	1.39653	1.43662	4.90734	Muscovite	54.36	29.74	3.12	2.39			9.41	0.98
703	MA-392	1.90178	2.01917	4.98919	Muscovite	54.74	30.2	3.04	2.52			9.5
704	MA-393	1.62161	1.34596	2.39178	I/M Mix	55.46	29.41	3.63	3.24			8.27
705	MA-394	1.11438	1.16727	1.71688	Feldspar	65.7	18.78	1.33		0.68	13.02	0.49
706	MA-395	2.1496	2.16432	2.46436	Biotite	48.19	22.12	15.39	8.1			4.31	1.88
707	MA-396	1.14842	1.62962	3.06197	C/B Mix	54.92	20.94	7.4	11.94			4.8
708	MA-397	2.11583	1.88085	3.10265	Feldspar	65.35	26.85					7.8
709	MA-398	1.31939	1.24133	1.59241	Feldspar	69.03	19.17				11.79
710	MA-399	2.49538	1.80401	1.77254	I/S Mix	58.31	26.54	7.27	3.99			3.89
711	MA-400	1.75077	1.49627	3.44727	Biotite	43.5	16.04	24.88	8.84			5.27	1.48
712	MA-401	1.06996	1.23638	6.80331	Muscovite	53.66	32.11	2.05	1.42		0.76	10
713	MA-402	2.83951	1.85237	1.67115	Feldspar	65.23	23.78			9.81		1.19
714	MA-403	1.20965	1.33544	3.75557	Quartz	99.27	0.73
715	MA-404	2.51994	1.77743	3.00457	I/S Mix	50.71	25.98	9.15	7.55			6.61
716	MA-405	1.25269	1.67294	8.67785	Illite	54.65	28.75	3.87	2.89			9.84
717	MA-406	1.62022	1.55782	3.78416	Chlorite	46.84	12.91	18.63	9.24	10.22		1.09	1.07
718	MA-407	1.64957	1.52181	5.80667	Quartz	93.96	3.2		0.8			0.69	1.34
719	MA-408	1.56423	1.3862	2.89875	Quartz	96.1	2.92		0.99
720	MA-409	2.07043	1.65019	3.99598	Quartz	100
721	MA-410	1.26223	1.21364	4.11918	Quartz	100
722	MA-411	1.4879	1.61228	1.91339	Feldspar	64.87	17.93	1.82	1.13		1.03	13.22
723	MA-412	1.34505	1.75945	1.96432	Quartz	88.63	6.21	3.49		0.75		0.92
724	MA-413	1.58129	1.49768	1.29196	Hi-Ti group	13.28	6.77	4.78				0.93	74.23
725	MA-414	3.30858	1.85459	2.37404	Feldspar	66	21.11			2.95	9.94
726	MA-415	1.31229	1.39358	1.58877	I/S Mix	61.39	20.92	10.46	5.47			1.76
727	MA-416	1.42405	1.42462	1.76328	Feldspar	67.14	25.04					7.82
728	MA-417	1.91871	1.44359	1.44982	Quartz	89.23	4.65	2.64	1.11			0.67	1.7
729	MA-418	1.13465	1.4853	2.22905	Chlorite	52.14	21.35	12.67	10.43			3.42
730	MA-419	1.26095	1.34122	1.75186	Chlorite	39.35	21.47	28.3	10.87
731	MA-420	1.9259	1.42493	2.3983	Kaolinite	60.97	39.03
732	PLZ4-001	1.58677	1.71303	3.42585	I/S Mix	55.51	27.01	5.96	5.03			6.49
733	PLZ4-002	1.62149	1.92496	3.5859	I/S Mix	56.48	21.39	12.62	5.46		1.23	2.81
734	PLZ4-003	1.28367	1.34454	1.41854	Unknown	28.53	17.32	30.76	2.28	15.79			2.55				2.76
735	PLZ4-004	1.41605	1.01321	1.5868	Chlorite	41.14	22.88	21.25	14.02			0.72
736	PLZ4-005	1.94915	1.37291	1.37281	Quartz	97.4	1.6	1
737	PLZ4-006	1.4565	1.21782	3.6885	Quartz	99.36	0.64
738	PLZ4-007	1.38811	1.01728	1.26536	Quartz	89.43	6.28	1.92	0.89			1.47
739	PLZ4-008	1.68202	1.39343	1.57408	Chlorite	33.44	24.15	25.04	17.38
740	PLZ4-009	1.70464	1.22067	1.2859	Quartz	81.79	11.96	6.25
741	PLZ4-010	1.49227	1.2546	1.267	Chrolite	58.4	18.55	9.06	13.99
742	PLZ4-011	1.35649	1.24074	9.9932	Quartz	94.53	5.47
743	PLZ4-012	1.33113	1.28138	13.7592	Quartz	100
744	PLZ4-013	1.66049	1.17637	8.38973	Quartz	97.84	1.18		0.42		0.3	0.26
745	PLZ4-015	2.11485	2.06902	8.24599	I/S Mix	67.76	21.58		4.75		1.91	4
746	PLZ4-016	1.54257	2.84281	23.9859	I/S Mix	58.31	23.12	8.33	4.04		1.05	4.63	0.53
747	PLZ4-017	1.25095	1.29686	6.15511	Feldspar	67.96	20.76	2.91	0.64	0.62	5.48	1.64
748	PLZ4-018	1.74109	1.34729	15.6977	I/S Mix	58.51	22.06	9.77	3.78		0.91	3.97	1
749	PLZ4-019	1.47181	1.60805	11.3096	Quartz	87.03	8.77	0.96	0.84		0.16	1.69	0.55
750	PLZ4-020	1.96041	1.47136	20.292	Illite	48.98	20.42	15.55	5.86		0.87	6.79	1.53
751	PLZ4-021	1.49984	1.08678	5.22775	Feldspar	67.07	17.7				0.68	14.55
752	PLZ4-022	1.63975	1.39039	14.9918	Quartz	81.81	13.82	0.56			1.35	2.45
753	PLZ4-023	1.16426	1.35581	19.6706	Smectite	68.2	16.07	9.28	1.5	0.97	0.3		1.48				2.21
754	PLZ4-024	1.77226	1.19934	7.07777	I/S Mix	65.02	21.54	2.6	1.27		7.95	1.62
755	PLZ4-025				I/S Mix	57.03	22.84	10.49	3.06		1.08	3.96	0.88	0.66
756	PLZ4-026	1.6504	1.23432	12.969	Chlorite	37.62	23.16	24.96	13.56			0.7
757	PLZ4-027	1.00816	1.08435	6.10124	Quartz	84.84	8.34	1.15	0.56		3.74	1.37
758	PLZ4-028	1.25115	1.03162	3.9472	Quartz	98.1	1.32		0.59
759	PLZ4-029	1.55242	2.63118	11.6637	Quartz	82.44	10	3.42	1.53	0.36	0.98	1.26
760	PLZ4-030	1.55021	1.21913	23.6937	Muscovite	50.24	35.65	0.79	0.26		0.71	10.58	1.77
761	PLZ4-032	1.46088	1.36421	7.15094	I/S Mix	60.62	20.96	8.86	4.03		1.48	4.05
762	PLZ4-033	1.38761	1.1182	6.18439	Quartz	100
763	PLZ4-034	2.22871	1.45743	10.4614	I/S Mix	68.71	17	5.03	1.45			3.05				4.76
764	PLZ4-035	1.99164	1.2573	7.65269	Feldspar	69.74	17.41	0.96			10.85	0.65	0.4
765	PLZ4-036	1.44665	1.31556	12.3232	Muscovite	52.32	35.76	1.01				10.92
766	PLZ4-037	2.23064	1.69522	13.8849	Illite	71.73	14.64	6.14	2.79		0.63	4.07
767	PLZ4-038	1.90924	1.39219	8.73783	Quartz	96.93	1.7				1.06	0.31
768	PLZ4-039	1.2399	1.18548	4.3711	Quartz	93.46	3.28	2.78				0.48
769	PLZ4-040	1.7286	1.23789	5.74153	Quartz	98.67	0.82		0.51
770	PLZ4-041	1.5047	1.28206	11.4684	I/S Mix	46.39	19.7	7.37	2.29			2.96				13.83	6.71
771	PLZ4-042	1.0907	1.11985	3.91247	C/B Mix	60.42	3.14	0.9	24.21	11.33
772	PLZ4-043	1.80318	1.27905	15.348	I/M Mix	51.72	35.32	2.26	0.71		0.98	9.01
773	PLZ4-045	2.1344	1.368	3.9967	Feldspar	67.22	17.7				1.25	13.82
774	PLZ4-046	1.45638	1.14942	5.38043	Quartz	100
775	PLZ4-047	1.00092	1.03984	12.0549	Kaolinite	43.25	39.54	0.53	0.74	1.34	14.24	0.36
776	PLZ4-048	1.49524	1.60678	8.21579	Quartz	91.19	4.72	2.25	0.82			1.02
777	PLZ4-049	1.51101	1.59764	6.91327	Quartz	95.66	2.85	0.44	0.55			0.5
778	PLZ4-050	1.38392	1.27259	20.8768	Quartz	88.71	7.48	0.99	0.44		0.29	2.09
779	PLZ4-051	1.34159	1.26276	10.7546	Quartz	92.68	3.94	1.98	0.59			0.8
780	PLZ4-052	1.59431	2.87203	6.59995	I/S Mix	53.94	21.53	14.14	3.91	0.68	1.01	3.18					1.6
781	PLZ4-053	1.48282	1.48256	13.6686	Quartz	97.93	1.15	0.92
782	PLZ4-054	1.84261	1.36308	4.4472	I/M Mix	55.04	29.99	3.84	2.54			8.59
783	PLZ4-055	1.30423	1.78026	11.0771	Quartz	92.51	5.51					1.98
784	PLZ4-056	1.66519	1.52108	6.4121	I/S Mix	60.08	22.13	8.36	3.76		0.86	2.91	1.9
785	PLZ4-057	1.44183	1.83417	7.51494	I/S Mix	70.08	16.44	5.5	3.46		1.03	3.49
786	PLZ4-058	2.08266	1.37379	6.27011	Quartz	100
787	PLZ4-059	1.31903	1.24751	10.704	Feldspar	73.2	14.52		0.51		2.96	8.81
788	PLZ4-060	1.44364	1.2079	3.11575	I/S Mix	59.86	22.87	8.52	3.04		0.2	5.51
789	PLZ4-061	1.94393	2.08645	3.36759	Feldspar	71.71	17.23				11.06
790	PLZ4-062	1.7379	1.43433	17.3005	Feldspar	63.84	22.3			4.94	8.93
791	PLZ4-063	1.38334	2.01285	12.4587	Feldspar	69.97	18.56		0.4		11.07
792	PLZ4-066	1.22964	1.07041	6.15872	I/S Mix	78.41	10.52	5.22	3.09		1.26	1.5
793	PLZ4-067	1.93786	1.40646	7.25107	I/S Mix	58.7	23.51	10.67	3.52			3.61
794	PLZ4-068	1.0416	1.75578	14.6228	Biotite	39.45	16.36	23.07	9.74			8.2	3.18
795	PLZ4-070	1.58013	1.31385	9.07784	C/B Mix	71.52	13.6	5.31	5.35		1.41	2.83
796	PLZ4-071	1.54293	1.93303	15.0691	Chrolite	42.13	20.24	20.66	14.85			2.12
797	PLZ4-072	2.05525	1.39309	6.10638	I/S Mix	57.87	21.08	8.42	6.85		1.56	4.22
798	PLZ4-073	1.39854	1.36439	19.9576	Quartz	82.69	7.79	7.03	1.07			1.43
799	PLZ4-074	1.315	1.64922	12.1321	Quartz	97.36	1.11	1.52
800	PLZ4-075	1.14732	1.12397	15.5348	Quartz	98.64	1.36
801	PLZ4-076	1.12815	1.0774	15.8572	C/B Mix	47.66	26.93	13.85	6.28	0.75	0.76	2.52	1.24
802	PLZ4-077	2.48068	2.42653	14.6391	Smectite	69.79	13.79	13.94	2.48
803	PLZ4-078	1.50117	2.31121	15.3957	I/S Mix	54.52	25.57	9.55	5.2	0.67	1.74	2.76
804	PLZ4-079	1.93944	1.30192	4.17635	Quartz	100
805	PLZ4-080	1.66982	1.36547	12.4583	I/M Mix	54.57	33.23	3.53	0.75		1.38	6.53
806	PLZ4-081	1.81756	1.90427	7.9665	Quartz	96.62	1.99	1.39
807	PLZ4-082	1.15042	1.96951	9.98484	Biotite	51.48	18.88	15.74	9.67			4.24
808	PLZ4-083	1.23454	2.02825	18.2725	Illite	62.96	21.85	4.03	1.49		1.4	8.26
809	PLZ4-084	1.25423	1.86762	17.3461	I/S Mix	67.43	19.56	4.85	1.44		4.54	2.19
810	PLZ4-085	1.41587	1.14712	22.0904	Muscovite	51.04	34.24	2.39	0.65		0.71	10.97
811	PLZ4-086	1.50965	2.26911	12.9566	I/S Mix	60.32	22.29	5.98	2.03		5.41	3.28	0.7
812	PLZ4-088	1.15115	1.34128	5.21951	Quartz	86.45	7.12	2.2	1.86			2.37
813	PLZ4-089	1.3309	1.02706	7.93729	Feldspar	61.08	30.51					8.41
814	PLZ4-090	4.31956	2.44186	4.128	I/M Mix	68.32	17.46				1.21	13.02
815	PLZ4-091	1.5415	1.27231	11.8152	Muscovite	53.13	31.94	2.74	1.7			9.72	0.77
816	PLZ4-092	1.63388	1.22431	4.98419	Feldspar	66.6	16.72				1.26	15.42
817	PLZ4-093	1.33719	2.53038	17.6622	Quartz	84.75	11.11	1.51	0.6			0.49	1.53
818	PLZ4-094	1.35718	1.31144	4.64373	Quartz	94.34	3.36	1.23	0.36			0.71
819	PLZ4-095	1.28087	2.12718	5.4905	Quartz	95.74	2.16	0.99	0.56			0.55
820	PLZ4-096	2.05931	1.89361	21.2961	I/S Mix	58.11	18.37	11.43	3.46	1.26	1.1	4.18	2.07
821	PLZ4-097	1.29319	1.26248	12.8176	Feldspar	71.34	17.92			0.63	9.73	0.38
822	PLZ4-098	3.55028	2.20082	8.86962	I/S Mix	57.5	23.57	12.26	2.57			4.1
823	PLZ4-099	1.28533	2.15469	11.2041	I/S Mix	59.12	21.34	9.44	4.34		1.02	4.74
824	PLZ4-100	1.67875	1.53764	15.3437	I/M Mix	54.14	35.51	1.68			1.12	7.55
825	PLZ4-101	3.06868	1.61265	14.7665	Muscovite	52.47	28.39	5.66	1.71			11.77
826	PLZ4-102	1.59701	1.09986	8.64995	Quartz	100
827	PLZ4-103	1.69831	1.27184	16.9234	Quartz	100
828	PLZ4-104	1.07364	1.4831	8.1724	Quartz	98.9	1.1
829	PLZ4-105	1.72313	1.2382	7.64919	Feldspar	62.56	23.89			7.7	5.85
830	PLZ4-106	1.29036	1.07615	10.5779	Quartz	94.87	2.9	0.93	0.55			0.75
831	PLZ4-107	1.83554	1.4062	8.29751	Biotite	42.59	16.19	26.23	8.72			5.34	0.93
832	PLZ4-108	1.39871	1.39243	6.10898	Quartz	82.46	9.6	3.69	0.56			1.99	1.71
833	PLZ4-109	1.44903	1.1522	8.91725	Quartz	97.5	1.85					0.65
834	PLZ4-110	1.27856	1.44258	14.5278	Quartz	98.28	1.07					0.65
835	PLZ4-111	1.483	1.24657	8.20896	Chrolite	45.51	22.63	21.39	8.02			2.45
836	PLZ4-112	1.49141	2.03476	13.2526	I/S Mix	61.24	20.25	11.42	2.09			5
837	PLZ4-113	2.25056	1.57161	5.92278	Feldspar	61.17	24.79			8.21	5.82
838	PLZ4-114	1.69843	1.96177	4.65384	Quartz	82.88	8.15	4.03	2.73			2.21
839	PLZ4-115	1.25513	1.15368	11.496	Smectite	66.79	18.51	4.27	1.24		9.19
840	PLZ4-116	2.37866	1.32423	5.32853	Quartz	97.8	1.35	0.84
841	PLZ4-117	1.83041	1.47918	14.3456	Feldspar	67.02	20.65			3.99	7.55	0.8
842	PLZ4-118	1.41306	1.8763	5.78458	I/S Mix	69.81	15.64	7.48	4.33			2.74
843	PLZ4-119	1.40886	1.14098	23.0664	I/S Mix	63.19	16.89	11.87	2.45			3.89					1.7
844	PLZ4-120	1.21626	1.0629	10.5804	Feldspar	67.3	20.08	0.85		0.81	10.52	0.43
845	PLZ4-121	1.23743	1.28477	7.23747	Chrolite	46.39	17.52	21.59	12.31	0.82		0.58		0.78
846	PLZ4-122	1.73238	1.24298	12.6065	I/M Mix	55.96	22.6	7.61	3.78			10.05
847	PLZ4-123	1.86339	1.09354	7.73455	Quartz	96.99	2.45					0.56
848	PLZ4-124	1.34619	1.60622	10.5183	Smectite	76.37	14.37	5.52	1.56		1.49	0.7
849	PLZ4-125	1.61373	2.14919	13.2647	I/S Mix	61.18	20.61	8.36	3.73		3.02	3.1
850	PLZ4-126	1.10947	1.14642	18.354	Quartz	100
851	PLZ4-127	1.56998	2.37577	12.7186	I/S Mix	68.66	18.95	6.65	1.87			3.88
852	PLZ4-128	1.27764	1.28062	24.0141	Illite	60.6	18.35	13.93	1.76			5.35
853	PLZ4-129	1.54829	1.29842	15.3421	Quartz	90.64	6.14	2.41				0.82
854	PLZ4-131	1.33714	1.38809	15.5619	Quartz	80.88	9.81	4.13	1.37			1.91	1.9
855	PLZ4-132	1.39784	1.30955	6.87804	Feldspar	69.07	18.46				12.47
856	PLZ4-133	1.79566	2.17537	18.3691	Quartz	80.68	19.32
857	PLZ4-134	1.94889	1.345	22.2272	Feldspar	76.76	23.24
858	PLZ4-135	1.39344	1.60888	6.54412	I/S Mix	55.44	23.43	10.3	5.99		1.08	3.76
859	PLZ4-136	1.52104	1.79735	15.0133	I/S Mix	52.6	27.18	5.41	1.73	1.53	0.48	6.77	4.3
860	PLZ4-137	1.52033	1.78862	23.5456	I/S Mix	61.01	20.21	8.52	3.31	0.7	0.98	4.07	1.21
861	PLZ4-138	1.41485	1.47328	6.04802	Feldspar	69.94	18.83				11.23
862	PLZ4-139	2.15817	1.73072	7.03753	Illite	52.72	26.18	8.93	5.37			6.79
863	PLZ4-140	1.36303	1.35718	6.00067	Quartz	82.64	6.59	7.76	0.95			2.06
864	PLZ4-141	1.33752	2.40942	18.3206	Illite	58.87	19.58	13.92	1.86			5.77
865	PLZ4-142	1.74249	1.42743	7.28307	Unknown	42.19	10.4	15.51		31.91
866	PLZ4-143	2.40943	1.3542	6.08283	Quartz	99.25	0.75
867	PLZ4-144	1.33999	1.19144	10.4744	Unknown	75.93	12.22	4.81	3.92			3.13
868	PLZ4-145	1.7899	1.78433	11.8884	Feldspar	63.28	23.43			6.35	6.93
869	PLZ4-146	1.20179	1.56062	10.4124	Muscovite	52.91	30.47	4.01	1.68		0.38	10.56
870	PLZ4-148	1.23029	1.21817	5.44688	Quartz	97.95	1.23	0.82
871	PLZ4-149	1.42822	1.33033	14.713	I/S Mix	76.49	11.26	4.09	2.87		2.41	2.05	0.82
872	PLZ4-150	1.61742	1.29699	9.69846	Illite	65.56	19.26	2.08	0.94		5.01	7.15
873	PLZ4-151	1.48954	1.52821	6.84917	Quartz	99.14	0.86
874	PLZ4-152	3.02804	1.39676	12.3692	Quartz	92.64	4.11	1.85				1.4
875	PLZ4-153	1.19565	1.45323	11.9573	Feldspar	63.06	22.9			8.56	4.9	0.58
876	PLZ4-154	1.75525	1.2606	15.3807	I/S Mix	59.02	19.7	15.19	2.05			4.04
877	PLZ4-156	1.31815	1.30543	10.6962	I/S Mix	43.06	16.72	7.19	3.02			2.85				17.1	8.71
878	PLZ4-157	1.44316	1.37018	12.965	Quartz	97.21	1.46	1.33
879	PLZ4-158	1.1	1.4694	6.00491	I/S Mix	54.64	21.37	13.28	4.39			3.75					2.58
880	PLZ4-159	1.47383	1.26848	4.97407	Quartz	100
881	PLZ4-160	1.39167	1.30062	19.0407	Quartz	90.34	5.95	1.34	0.7			1.67
882	PLZ4-161	1.00906	1.34788	11.0696	Kaolinite	44.1	39.93		0.8	1.17	13.64	0.35
883	PLZ4-162	1.3875	1.3356	9.74164	Quartz	93.63	3.31	1.49	1.06			0.49
884	PLZ4-163	1.21835	1.19132	7.59092	Quartz	90.23	5.55	2.26	0.62			1.34
885	PLZ4-164	1.28569	1.14601	7.37608	Quartz	93.84	4.47		0.71			0.98
886	PLZ4-165	1.42531	1.46826	6.80516	I/S Mix	49.01	25.65	13.05	5.83		0.41	5.33	0.71
887	PLZ4-166	2.06225	1.64134	3.55032	I/S Mix	58.51	22.78	9.36	3.7		1.23	3.3	1.12
888	PLZ4-167	1.30039	1.27658	4.1779	Quartz	100
889	PLZ4-168	1.23098	1.56485	9.28506	I/S Mix	56.47	26	9.69	2.2		0.52	5.12
890	PLZ4-169	1.42824	1.51138	19.2735	Quartz	93.56	3.72	1.09	0.61			1.01
891	PLZ4-170	1.85723	1.39484	11.0606	C/B Mix	48.72	7.62		43.67
892	PLZ4-171	1.58832	1.12914	3.11956	I/S Mix	41.05	7	3.14	0.97	3.97		0.61				17.26						7.09	14.77	4.15
893	PLZ4-172	5.58343	1.6742	8.94241	I/S Mix	77.86	14.34	2.83	0.88		1.35	2.74
894	PLZ4-173	2.27951	1.38451	24.6342	I/S Mix	55.32	22.56	12.68	2.65		1.35	4.05	1.4
895	PLZ4-174	1.29892	1.23298	11.7831	Quartz	85.53	7.94	2.59	1.97			1.96
896	PLZ4-175	1.60633	1.45496	14.8282	I/S Mix	65.47	21.01	3.07	2.13		6.36	1.96
897	PLZ4-177	1.63627	1.41625	9.57323	Quartz	95.55	2.31	1.06	0.61			0.46
898	PLZ4-178	1.36064	1.23159	17.8613	Quartz	79.08	7.58	3.87	1.89								7.59
899	PLZ4-179	1.31951	1.63707	16.9215	I/S Mix	60.67	18.12	10.91	4.33		0.86	4.54	0.57
900	PLZ4-180	1.612	1.00424	16.2748	Illite	70.67	16.42	3.95	2.27		0.76	5.41	0.51
901	PLZ4-181	1.05635	1.25716	35.2507	Illite	56.87	22.88	11.82	1.25			6.24	0.93
902	PLZ4-182	1.20039	1.28034	14.3858	Biotite	42.09	18.16	18.02	12.71			7.56	1.46
903	PLZ4-183	1.21263	1.66494	7.92005	Feldspar	54.37	23.32	10.13				4.23													7.94
904	PLZ4-184	1.54796	1.38262	10.4377	Muscovite	52.81	32.72	2.82	1.29		0.34	9.52	0.49
905	PLZ4-185	1.2608	1.02088	3.38559	Quartz	95.45	1.84	1.96	0.5			0.26
906	PLZ4-186	1.05505	1.05305	4.02697	Biotite	48.66	18.48	14.31	12.46			5.01	1.1
907	PLZ4-187	1.37403	1.1475	6.49974	Quartz	95.62	2.45	0.6	0.52			0.8
908	PLZ4-188	1.38191	1.63823	9.35011	Illite	58.74	15.66	16.9	2.73		0.64	4.06	1.29
909	PLZ4-189	2.04646	1.45966	12.7098	Chrolite	40.48	20.13	21.74	12.25			1.35	4.05
910	PLZ4-190	1.4216	1.21707	15.8668	Quartz	99.07	0.93
911	PLZ4-191	1.64801	1.29365	16.3209	Feldspar	52.73	27.62	4.34			0.54	14.77
912	PLZ4-192	1.38879	1.70673	7.25315	I/S Mix	57.38	23.26	10.17	4.17			5.03
913	PLZ4-193	1.2236	1.0014	4.04726	I/S Mix	55.55	25.28	9.93	2.69			5.19	1.36
914	PLZ4-194	1.51287	1.5397	9.29802	I/S Mix	58.91	21.14	9.43	4.98		0.81	3.72	1
915	PLZ4-195	1.82704	1.19978	8.3969	Muscovite	53.69	33.4	1.85	1.17			9.89
916	PLZ4-196	1.34998	1.08428	5.37095	Feldspar	66.49	20.37			1.57	11.2	0.37
917	PLZ4-197	1.73743	2.39276	3.77984	I/S Mix	54.52	23.4	10	6.1		1.06	4.07	0.85
918	PLZ4-198	1.75003	1.50869	9.80105	Feldspar	55.7	21.19					19.31	3.81
919	PLZ4-199	1.72115	1.64303	2.88799	Unknown	45.66	25.03	9.19	0.73	18.22		1.16
920	PLZ4-200	1.4786	1.21149	3.66747	Illite	58.88	26.25	4.83	3.24			6.79
921	PLZ4-201	1.16794	1.00273	8.10428	Quartz	97.36	1.52	1.12
922	PLZ4-202	1.39522	1.32073	1.96221	I/S Mix	58.09	25.88	5.49	4.29		2.6	3.65
923	PLZ4-203	1.01066	1.00114	12.1819	Quartz	100
924	PLZ4-204	2.07275	1.46701	7.20426	C/B Mix	37.42	26.86	23.11	8.72		0.46	3.43
925	PLZ4-205	1.93635	1.22246	6.84065	Muscovite	53.38	30.54	3.2	1.63		0.36	10.88
926	PLZ4-206	1.21391	1.9485	2.36507	I/M Mix	56.89	32.23	2.26	1.2			7.43
927	PLZ4-207	1.16726	1.25209	2.58131	I/S Mix	66.52	17.26	6.32	1.8		5.94	2.17
928	PLZ4-208	1.12637	1.03709	5.68503	Quartz	94.04	4.71					1.25
929	PLZ4-209	2.05977	2.67756	6.80087	Quartz	84.01	15.99
930	PLZ4-210	1.51116	1.29577	5.49343	Feldspar	67.68	19.22	1.33			10.78	0.98
931	PLZ4-211	1.30268	1.2251	13.5358	Biotite	42.22	20.35	23.3	8.75			5.38
932	PLZ4-212	1.02784	1.13018	9.80748	Quartz	83.8	5.21	10.99
933	PLZ4-213	1.54858	1.2237	6.59397	Quartz	90.16	4.83	3.39	0.86			0.76
934	PLZ4-214	1.34154	1.39634	11.7999	Quartz	81.29	14.91					3.8
935	PLZ4-215	1.50989	1.97264	3.75524	I/S Mix	60.15	20.39	11.85	2.96		1.17	3.48
936	PLZ4-216	1.55202	1.76592	9.27232	I/M Mix	53.18	19.98	9.49	3.53			13.81
937	PLZ4-217	1.18164	1.31964	5.61016	I/M Mix	54.79	13.91	16.65	2.11			12.55
938	PLZ4-218	1.15962	1.49826	14.4853	Quartz	88.23	7.43	1.12	0.48		1	1.74
939	PLZ4-219	1.44584	1.09236	5.72802	Biotite	53.33	17.59	12.76	10.57		0.32	4.24	1.18
940	PLZ4-220	1.79621	1.47931	5.90804	Quartz	96.45	2.27		0.43			0.85
941	PLZ4-221	2.05873	1.73848	7.24025	Quartz	84.24	8.72	3.84	1.13			2.07
942	PLZ4-222	1.18755	1.222	8.86159	Feldspar	65.14	16.82	2.27			3.2	12.58
943	PLZ4-223	1.12177	1.92896	7.86776	Quartz	79.79	12.52	1.38	0.93		4.3	1.08
944	PLZ4-224	1.58018	1.14706	7.60245	Hi-Fe group	19.2	10.77	66.23	1.75			1.01	1.05
945	PLZ4-225	1.3973	1.18592	4.18837	Feldspar	79.63	12.19	1.72			4.74	1.72
946	PLZ4-226	1.32233	1.87902	5.1296	Quartz	100
947	PLZ4-227	1.44434	2.43323	6.31125	I/S Mix	60.32	21.88	7.94	3.85		1.46	4.56
948	PLZ4-228	2.04374	1.66565	8.72726	I/S Mix	76.5	16.47	3.26	1.16			2.61
949	PLZ4-229	1.61406	1.84931	3.98934	Quartz	89.1	6.09	2.4	1.39			1.01
950	PLZ4-230	1.53143	1.7144	6.36378	Feldspar	69.16	18.06	1.02			11.03	0.73
951	PLZ4-231	1.43122	1.21352	3.08777	I/M Mix	56.89	30.37	0.95	1.54		3.16	7.1
952	PLZ4-232	1.12266	2.01335	9.61269	Muscovite	52.05	34.84	1.73	0.75			10.63
953	PLZ4-233	2.27299	2.13585	11.2916	Illite	70.07	14.35	8.73	2.73			4.11
954	PLZ4-234	1.47253	1.74018	6.23089	Hi-Fe group	4.75		84.56							7.65		1.91
955	PLZ4-235	1.33759	1.39073	2.57303	Quartz	99.05	0.95
956	PLZ4-236	1.23794	1.36609	30.8107	Biotite	45.54	18	15.38	15.99			3.79	1.3
957	PLZ4-237	1.81412	1.24316	4.16026	Illite	67.33	18.46	1.82	0.83		5.29	6.26
958	PLZ4-238	1.47606	1.15828	17.0411	I/S Mix	69.05	19.71	5.74	0.97		1.12	3.41
959	PLZ4-239	1.27458	1.54223	13.28	Quartz	89.26	5.42	3.5	0.77			1.06
960	PLZ4-240	1.40825	1.47763	5.3427	Quartz	95.79	2.32	1.28				0.6
961	PLZ4-241	1.83136	1.45437	5.32895	Quartz	92.2	3.14	1.61				0.7	2.36
962	PLZ4-242	1.3339	1.67042	6.78932	Illite	52.6	20.26	16.07	5.36			5.72
963	PLZ4-243	1.37965	1.04196	3.89355	Quartz	86.3	9.01	1.45	0.38		1.09	1.77
964	PLZ4-244	1.36373	1.02751	5.55961	I/S Mix	56.85	23.67	12.76	1.94			4.79
965	PLZ4-245	1.25293	1.11029	6.84971	Quartz	98.03	1.58		0.39
966	PLZ4-246	1.76233	1.63708	5.82005	Quartz	99.38	0.62
967	PLZ4-247	2.71014	1.77665	26.8535	Feldspar	60.49	22.89	1.77		13.62		1.24
968	PLZ4-248	1.6017	1.86501	7.59991	I/S Mix	61.66	19.74	8.79	4.06		1.5	3.52	0.73
969	PLZ4-249	1.60687	1.52097	13.7132	Quartz	92.57	3.67	1.94	0.55				1.26
970	PLZ4-250	1.54902	1.20229	8.02432	Feldspar	67.74	19.55			0.98	11.73
971	PLZ4-251	1.36564	1.15058	8.02819	Kaolinite	52.11	42.55	1.23		1.24	1.75	1.12
972	PLZ4-252	1.69544	1.25894	4.30823	Illite	62.85	22.7	5.37	3.15			5.94
973	PLZ4-253	1.70991	1.54477	14.2074	Quartz	99.64	0.36
974	PLZ4-254	1.45628	1.15997	11.7743	Quartz	93.42	4.11	1.9				0.57
975	PLZ4-256	1.52471	1.27634	2.98657	Feldspar	66.43	19.3	0.92			1.2	12.14
976	PLZ4-257	1.43012	1.46959	5.64986	I/S Mix	57.57	25.77	8.13	3.22			5.31
977	PLZ4-258	1.77095	1.6278	4.61226	Feldspar	62.68	23.59	4.17		2.22	4.33	3.01
978	PLZ4-259	1.08739	1.16015	12.8125	Quartz	82.21	10.85	2.97	1.16			2.82
979	PLZ4-260	2.01273	2.51531	4.43055	Quartz	89.52	6.21	1.77	1.05			1.45
980	PLZ4-261	2.22794	1.75901	14.0015	Muscovite	51.23	35.81	1.52			0.69	10.75
981	PLZ4-262	1.40778	1.30507	3.53563	Illite	55.53	29.21	2.63	3.39			9.25
982	PLZ4-263	1.65258	1.43421	10.6231	Feldspar	69.85	18.35	2.79			8.51	0.5
983	PLZ4-264	2.14904	1.46676	5.64164	Feldspar	66.79	17.7					15.5
984	PLZ4-265	1.17295	1.50348	16.6065	I/S Mix	62.48	20.02	8.3	2.86		1.53	3.98	0.83
985	PLZ4-266	1.09373	1.98622	22.0793	Illite	59.78	24.77	1.5	3.48		1.37	9.1
986	PLZ4-267	1.17514	1.55142	24.2757	I/S Mix	60.71	20.89	7.46	4.56		2.89	3.49
987	PLZ4-268	1.40129	1.22838	7.0486	Muscovite	52.21	32.13					15.66
988	PLZ4-269	1.51377	1.65635	6.38052	Quartz	100
